# Supplementary material
Source: publisher figshare collection journal article supplement (https://acs.figshare.com/ndownloader/files/22129152)
Supplement: Supplementary file 1 [file 22129152]

# Supporting Information

## Optimization of Indazole-Based GSK-3 Inhibitors with Mitigated hERG Issue and *In Vivo* Activity in a Mood Disorder Model

*Federica Prati, Rosa Buonfiglio, Guido Furlotti, Claudia Cavarischia, Giorgina Mangano, Rossella Picollo, Laura Oggianu, Anna di Matteo, Silvana Olivieri, Graziella Bovi, Pier Francesca Porceddu, Angelo Reggiani, Beatrice Garrone, Francesco Paolo Di Giorgio, and Rosella Ombrato\**

| <b>Table of contents</b>                                                          | <b>Pg</b> |
|-----------------------------------------------------------------------------------|-----------|
| Figure S1                                                                         | S2        |
| Tables S1-S5                                                                      | S2-S5     |
| Chemistry                                                                         | S6-S10    |
| X-ray crystal structure of GSK-3 $\beta$ kinase in complex with compound <b>1</b> | S10-S11   |
| Docking material                                                                  | S11       |
| MD setup                                                                          | S11       |
| Enzymatic GSK-3 $\beta$ assay                                                     | S12       |
| hERG assay                                                                        | S12       |
| Cellular GSK-3 $\beta$ assay                                                      | S12       |
| In vitro ADME methods                                                             | S12-S13   |
| PK study                                                                          | S13       |
| Amphetamine model                                                                 | S14       |
| Kinase selectivity panel                                                          | S14       |
| <sup>1</sup> HNMR and <sup>13</sup> CNMR spectra of final compounds               | S15-S26   |
| HPLC analysis data of final compounds                                             | S27-S41   |
| References                                                                        | S42       |

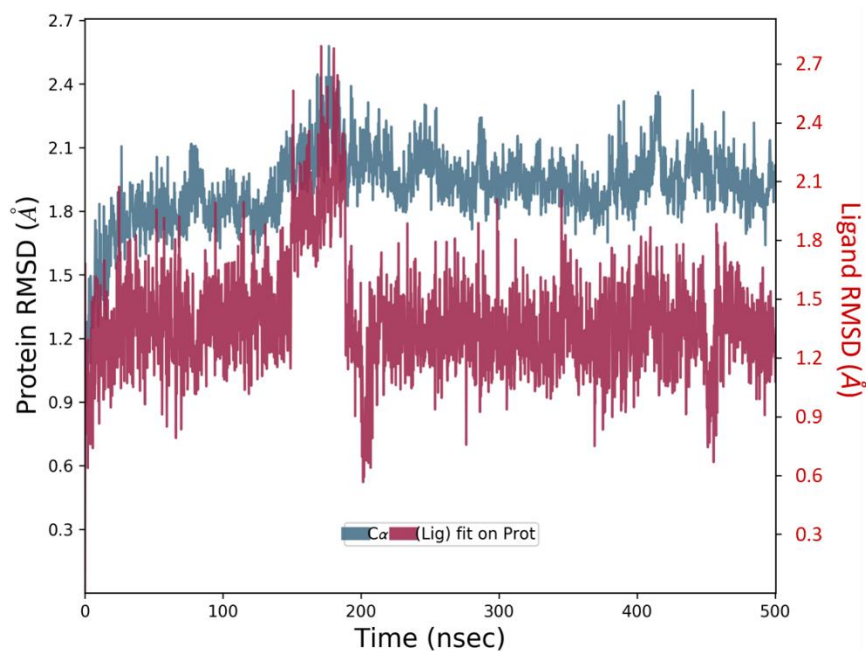

**Figure S1.** RMSD of the atomic positions for ligand **14** (in red, Lig fit Prot) and the GSK-3 $\beta$  kinase (C $\alpha$  positions in blue) of the 500 ns molecular dynamics simulations using Desmond package. The complex is stable along the simulation with persistent hydrogen bonds involving the hinge residues. The peak of ligand RMSD is due to the fluctuation of the solvent exposed oxanyl group.

**Table S1.** CNS-MPO Values Calculated for Compounds 1-16<sup>a</sup>

| Cmpd | T0 value |          |         |          |        |        | CNS_MPO |
|------|----------|----------|---------|----------|--------|--------|---------|
|      | T0_MW    | T0_cLogP | T0_TPSA | T0_cLogD | T0_HBD | T0_pKa |         |
| 1    | 0.51     | 0.88     | 1.00    | 0.92     | 0.50   | 0.80   | 4.60    |
| 2    | 0.92     | 0.95     | 1.00    | 0.45     | 0.50   | 1.00   | 4.82    |
| 3    | 0.92     | 0.95     | 1.00    | 0.45     | 0.50   | 1.00   | 4.81    |
| 4    | 1.00     | 1.00     | 1.00    | 0.65     | 0.50   | 1.00   | 5.15    |
| 5    | 1.00     | 1.00     | 1.00    | 0.54     | 0.50   | 1.00   | 5.04    |
| 6    | 1.00     | 1.00     | 1.00    | 0.60     | 0.50   | 1.00   | 5.10    |
| 7    | 1.00     | 1.00     | 1.00    | 0.54     | 0.50   | 1.00   | 5.04    |
| 8    | 1.00     | 1.00     | 1.00    | 0.87     | 0.50   | 1.00   | 5.37    |
| 9    | 0.68     | 1.00     | 0.66    | 1.00     | 0.50   | 1.00   | 4.83    |
| 10   | 0.78     | 1.00     | 0.66    | 1.00     | 0.50   | 1.00   | 4.93    |
| 11   | 1.00     | 1.00     | 1.00    | 1.00     | 0.50   | 1.00   | 5.50    |
| 12   | 0.75     | 1.00     | 1.00    | 0.72     | 0.50   | 1.00   | 4.97    |
| 13   | 0.85     | 1.00     | 1.00    | 1.00     | 0.50   | 1.00   | 5.35    |
| 14   | 0.95     | 1.00     | 0.66    | 1.00     | 0.17   | 1.00   | 4.78    |
| 15   | 0.85     | 1.00     | 1.00    | 1.00     | 0.50   | 1.00   | 5.35    |
| 16   | 0.95     | 1.00     | 0.66    | 1.00     | 0.17   | 1.00   | 4.78    |

<sup>a</sup>Physicochemical properties were calculated using ACD/Percepta 2017.2.

**Table S2. GSK-3 $\beta$  IC<sub>50</sub> and 95% Confidence Intervals**

| <b>Cmpd</b> | <b>GSK-3<math>\beta</math> IC<sub>50</sub> (<math>\mu</math>M)</b> | <b>95% Lower confidence limit (<math>\mu</math>M)</b> | <b>95% Upper confidence limit (<math>\mu</math>M)</b> |
|-------------|--------------------------------------------------------------------|-------------------------------------------------------|-------------------------------------------------------|
| <b>1</b>    | 0.018                                                              | 0.016                                                 | 0.020                                                 |
| <b>2</b>    | 0.014                                                              | 0.010                                                 | 0.018                                                 |
| <b>3</b>    | 0.020                                                              | 0.016                                                 | 0.025                                                 |
| <b>4</b>    | 0.026                                                              | 0.020                                                 | 0.035                                                 |
| <b>5</b>    | 0.055                                                              | 0.037                                                 | 0.083                                                 |
| <b>6</b>    | 0.022                                                              | 0.021                                                 | 0.033                                                 |
| <b>7</b>    | 0.031                                                              | 0.021                                                 | 0.045                                                 |
| <b>8</b>    | 0.130                                                              | 0.048                                                 | 0.364                                                 |
| <b>9</b>    | 0.039                                                              | 0.020                                                 | 0.075                                                 |
| <b>10</b>   | 0.014                                                              | 0.013                                                 | 0.017                                                 |
| <b>11</b>   | 0.022                                                              | 0.018                                                 | 0.027                                                 |
| <b>12</b>   | 0.004                                                              | 0.0001                                                | 0.277                                                 |
| <b>13</b>   | 0.006                                                              | 0.005                                                 | 0.007                                                 |
| <b>14</b>   | 0.004                                                              | 0.004                                                 | 0.005                                                 |
| <b>15</b>   | 0.028                                                              | 0.019                                                 | 0.043                                                 |
| <b>16</b>   | 0.033                                                              | 0.026                                                 | 0.043                                                 |

**Table S3. GSK-3 $\beta$  IC<sub>50</sub> and 95% Confidence Intervals**

| <b>Cmpd</b> | <b>hERG IC<sub>50</sub> (<math>\mu</math>M)</b> | <b>95% Lower confidence limit (<math>\mu</math>M)</b> | <b>95% Upper confidence limit (<math>\mu</math>M)</b> |
|-------------|-------------------------------------------------|-------------------------------------------------------|-------------------------------------------------------|
| <b>1</b>    | 0.044                                           | 0.035                                                 | 0.0557                                                |
| <b>2</b>    | 4.1                                             | 2.97                                                  | 5.538                                                 |
| <b>3</b>    | 22.3                                            | 17.64                                                 | 28.30                                                 |
| <b>4</b>    | 4.3                                             | 3.157                                                 | 5.846                                                 |
| <b>5</b>    | 11.0                                            | 6.610                                                 | 18.37                                                 |
| <b>6</b>    | 1.8                                             | 0.825                                                 | 3.744                                                 |
| <b>7</b>    | 6.6                                             | 4.315                                                 | 10.01                                                 |
| <b>8</b>    | 13.3                                            | 10.38                                                 | 17.10                                                 |
| <b>9</b>    | 2.1                                             | 1.537                                                 | 2.746                                                 |
| <b>10</b>   | 14.5                                            | 8.554                                                 | 24.68                                                 |
| <b>11</b>   | 49.3                                            | 15.97                                                 | 152.5                                                 |
| <b>12</b>   | 0.86                                            | 0.617                                                 | 1.219                                                 |
| <b>13</b>   | 5.7                                             | 2.708                                                 | 11.85                                                 |
| <b>14</b>   | >100                                            | 156.8                                                 | 1383                                                  |
| <b>15</b>   | 47.1                                            | 30.89                                                 | 71.65                                                 |
| <b>16</b>   | 41.3                                            | 22.86                                                 | 74.81                                                 |

**Table S4. Percent of Inhibition of 14 at 10  $\mu$ M and Standard Deviation (S.D.) for a 42 Kinases Panel**

| <b>Kinase</b>               | <b>INH %<br/>(10<math>\mu</math>M)</b> | <b>S.D.</b> |
|-----------------------------|----------------------------------------|-------------|
| <i>h</i> -ALK               | 42                                     | 11          |
| <i>h</i> -AMPK $\alpha$     | 12                                     | 2           |
| <i>h</i> -AurA/Aur2 kinase  | 10                                     | 2           |
| <i>h</i> -CDC2/CDK1 (cycB)  | 97                                     | 2           |
| <i>h</i> -CDK2 (cycA)       | 99                                     | 0           |
| <i>h</i> -CDK3 (cycE1)      | 93                                     | 0           |
| <i>h</i> -CDK9 (cycT1)      | 92                                     | 1           |
| <i>h</i> -CHK1              | 1                                      | 10          |
| <i>h</i> -CHK2              | 18                                     | 9           |
| <i>h</i> -CLK1              | 100                                    | 0           |
| <i>h</i> -DLK1 (MAP3K12)    | 64                                     | 2           |
| <i>h</i> -DYRK1a            | 100                                    | 0           |
| <i>h</i> -DYRK2             | 98                                     | 0           |
| <i>h</i> -ERK1              | 93                                     | 1           |
| <i>h</i> -ERK2 (P42mapk)    | 91                                     | 0           |
| <i>h</i> -FLT-3 kinase      | 32                                     | 4           |
| <i>h</i> -GRK2 (ADRBK1)     | 98                                     | 0           |
| <i>h</i> -GSK-3 $\alpha$    | 100                                    | 0           |
| <i>h</i> -HGK (MAP4K4)      | 96                                     | 0           |
| <i>h</i> -HIPK2             | 58                                     | 1           |
| <i>h</i> -IRK (InsR)        | -1                                     | 3           |
| <i>h</i> -JAK1              | 3                                      | 9           |
| <i>h</i> -JAK2              | 10                                     | 1           |
| <i>h</i> -JAK3              | 20                                     | 4           |
| <i>h</i> -JNK1              | 75                                     | 3           |
| <i>h</i> -JNK3              | 78                                     | 11          |
| <i>h</i> -Lck kinase        | -7                                     | 14          |
| <i>h</i> -LynA kinase       | 49                                     | 7           |
| <i>h</i> -LynB kinase       | 99                                     | 0           |
| <i>h</i> -MAPKAPK5 (PRAK)   | 40                                     | 4           |
| <i>h</i> -MEK1/MAP2K1       | 86                                     | 0           |
| <i>h</i> -MST3 kinase       | 31                                     | 5           |
| <i>h</i> -p70S6K $\beta$    | -1                                     | 7           |
| <i>h</i> -PKA               | -2                                     | 1           |
| <i>h</i> -PKD1 (PKC $\mu$ ) | 36                                     | 15          |
| <i>h</i> -PKN2              | 9                                      | 0           |
| <i>h</i> -ROCK1             | 4                                      | 2           |
| <i>h</i> -ROCK2             | 10                                     | 3           |
| <i>h</i> -smMLCK (MYLK)     | 37                                     | 3           |
| <i>h</i> -Src kinase        | 41                                     | 7           |
| <i>h</i> -TAOK2 (TAO1)      | 20                                     | 2           |
| <i>h</i> -TRKA              | 10                                     | 1           |

**Table S5. IC<sub>50</sub> Values of 14 for Selected Kinases<sup>a</sup>**

| <b>Kinase</b>              | <b>IC<sub>50</sub> (μM)</b> |
|----------------------------|-----------------------------|
| <i>h</i> -CDC2/CDK1 (cycB) | 0.410                       |
| <i>h</i> -CDK2 (cycA)      | 0.027                       |
| <i>h</i> -CDK3 (cycE1)     | 0.290                       |
| <i>h</i> -CDK9 (cycT1)     | 0.500                       |
| <i>h</i> -CLK1             | 0.013                       |
| <i>h</i> -DLK1 (MAP3K12)   | 6.10                        |
| <i>h</i> -DYRK1a           | <0.010                      |
| <i>h</i> -DYRK2            | 0.290                       |
| <i>h</i> -ERK1             | 0.700                       |
| <i>h</i> -ERK2 (P42mapk)   | 0.300                       |
| <i>h</i> -GRK2 (ADRBK1)    | 0.011                       |
| <i>h</i> -GSK-3α           | <0.010                      |
| <i>h</i> -HGK (MAP4K4)     | 0.350                       |
| <i>h</i> -HIPK2            | 9.00                        |
| <i>h</i> -JNK1             | 1.60                        |
| <i>h</i> -JNK3             | 4.40                        |
| <i>h</i> -LynA kinase      | 54.00                       |
| <i>h</i> -LynB kinase      | <0.010                      |
| <i>h</i> -MEK1/MAP2K1      | 0.750                       |

<sup>a</sup>percent of inhibition at 10 μM higher than 50%.

## CHEMISTRY

Reagents were purchased from Sigma-Aldrich and used as received.

Reaction progress was monitored by TLC or LC-MS. For TLC analysis, Merck silica gel 60 F254 (0.04–0.063 mm) plates with detection by UV (214 or 254 nm) were used. LC-MS analyses were performed on Shimadzu LCMS-2020 Single Quadrupole Liquid Chromatograph Mass Spectrometer and column: Acquity UPLC C18 (2.1 x 50 mm, 1.8  $\mu$ m).

EM Discover SP focused microwave reactor was used for microwave-mediated reactions.

Final compound purity (always >95%) was determined by HPLC-UV, by comparing the area of the target peak and total peak areas of minor impurities. HPLC-UV analyses were carried out with a pump/autosampler (Waters 2695, Alliance model), a UV photo diode array detector (Waters 2996 model), and a Waters system data management (Empower 2). The column used was generally X-Bridge C18 (150 x 4.6 mm, 5  $\mu$ m).

UPLC-QTOF analyses for HRMS determination of final compounds were performed by means of a SYNAPT MS-ACQUITY UPLC system (Waters). The system was operated in positive ion mode in the "V-Optics" configuration. Leucine-enkephalin (200 pg/ $\mu$ L) was employed as the lock mass in order to provide authenticated exact mass measurement in MS and MS/MS modes within 5 ppm RMS mass accuracy. The column was an Acquity BEH C18 (50 x 2.1 mm, 1.7  $\mu$ m).

Nuclear Magnetic Resonance Spectroscopy ( $^1\text{H}$  NMR and  $^{13}\text{C}$  NMR) were obtained using Bruker Avance systems, operating at 300, 400 and 500 MHz. Spectra were acquired at 300 K, using DMSO- $d_6$ , CD $_3$ OD, and CDCl $_3$  as solvents. All resonance bands were referenced to tetramethylsilane (internal standard). For  $^1\text{H}$  NMR spectroscopy: (s) = singlet; (d) = doublet; (t) = triplet; (br) = broad; (dd) = double doublet; (dt) = double triplet; (ddd) = double double doublet; (dtd) = double triple doublet; (m) = multiplet;  $J$  = coupling constant; and  $\delta$  = chemical shift (in ppm).

Compounds were purified with one of the following techniques: i) flash chromatography on silica gel (Grace Reveleris flash chromatography system with a 40  $\mu$ m silica cartridge, flow = 60 mL/min), with an appropriate gradient of mixtures of DCM/MeOH or Cyclohexane/EtOAc as eluents; ii) preparative HPLC-MS system (sample was dissolved at 50 mg/mL in DMSO/CH $_3$ CN in 1:1 ratio), using an appropriate gradient of CH $_3$ CN and H $_2$ O + 0.1% NH $_4$ HCO $_3$ ; flow = 40 mL/min. The preparative HPLC-MS system consisted of a Waters 2767 Sample manager, a Waters 2478 dual  $\lambda$  absorbance detector, and a Waters Micromass ZQ single quadrupole mass spectrometer with an electrospray ionization (ESI) source. The column used was a X-Bridge Prep C18 5  $\mu$ m with 19 x 10 mm (Waters) precolumn. Fraction collection was available from the system software MassLynx v. 4.1. Detection wavelength was set to 230 nm and temperature to 25  $^\circ\text{C}$ .

### General methods for the synthesis of carboxamide intermediates 17 -25

General method (A): HOBt (1.1 eq.) and DCC (1.07 eq.) were added to a solution of 5-bromo-1*H*-indazole-3-carboxylic acid (1.0 eq.) in DMF at 0  $^\circ\text{C}$ . After 1 hour, a solution of the proper amine (1.2 eq.) was added at the same temperature. The mixture was stirred at 0  $^\circ\text{C}$  for 2 hours and left to reach room temperature overnight. The mixture was then concentrated under vacuum, diluted with EtOAc, and washed with aqueous 2N NaOH solution and with brine. The organic phase was dried over anhydrous MgSO $_4$ , filtered and evaporated under reduced pressure to give the target compound. Purification by flash chromatography was performed when required.

General method (B): A mixture of 5-bromo-1*H*-indazole-3-carboxylic acid (1.0 eq.), the proper amine (1 - 1.2 eq.), HOBt (1.2 eq.) and EDC.HCl (1.2 eq.) in DMF was stirred at room temperature overnight. The mixture was concentrated under vacuum and then diluted with EtOAc. The solution was washed with aqueous 2N NaOH solution and brine. The organic phase was dried over anhydrous MgSO $_4$ , filtered and evaporated under reduced pressure to give the target compound. Purification by flash chromatography was performed when required.

### General methods for the synthesis of final compounds 2-16

General method (C): A mixture of the suitable carboxamide intermediate (1.0 eq.), the proper boronic acid (1.3 - 4 eq.), and Cs $_2$ CO $_3$  (1.3 - 4 eq.) in 1,4-dioxane/water (4:1) was placed in a Schlenk tube. The resulting mixture was degassed with N $_2$  for 10 minutes. Then, PdCl $_2$ (dppf) (0.08 – 0.25 eq.) was added and the mixture was heated in the microwave at 130  $^\circ\text{C}$  for 15 minutes. The mixture was diluted with EtOAc/MeOH and the insoluble solids were removed by filtration through Celite. The solvent was evaporated under reduced pressure and the residue was purified by flash chromatography to give the target final compound.

General method (D): A mixture of the suitable carboxamide intermediate (1.0 eq.), the proper boronic acid / ester (2.0 eq.) or bromide (1.2 - 2 eq.), and CsF (2 eq.) in 1,4-dioxane and water (4:1) was placed in a Schlenk tube. The resulting mixture was degassed with N $_2$  for 10 minutes. Then, PdCl $_2$ (dppf) (0.05 – 0.1 eq.) was added and the mixture was heated at 100  $^\circ\text{C}$  overnight. The mixture was diluted with MeOH and the insoluble solids were removed by filtration through Celite. The solvent was evaporated under reduced pressure and the residue was purified by flash chromatography to give the target final compound.

General method (E): A mixture of the suitable carboxamide intermediate (1.0 eq.), the proper bromide (1.1 eq.) and aqueous 2N Na $_2$ CO $_3$  solution (1.1 eq.) in DMF was placed in a Schlenk tube. The resulting mixture was degassed with N $_2$  for 10 minutes.

Then, Pd(PPh<sub>3</sub>)<sub>4</sub> (0.05 eq.) was added and the mixture was heated at 100 °C overnight. The mixture was diluted with EtOAc/MeOH and then the insoluble solids were removed by filtration through Celite. The solvent was evaporated under reduced pressure and the residue was purified by flash chromatography to give the target final compound.

**5-Bromo-N-((tetrahydro-2H-pyran-4-yl)methyl)-1H-indazole-3-carboxamide (17).** The title compound was obtained according to general method (A) using 5-bromo-1H-indazole-3-carboxylic acid (0.1 g, 0.415 mmol), (tetrahydro-2H-pyran-4-yl)methanamine (0.055 g, 0.481 mmol), HOBt (0.062 g, 0.456 mmol), DCC (0.092 g, 0.444 mmol). The crude was purified by flash chromatography (SiO<sub>2</sub>, DCM/MeOH), affording 0.11 g of the title product. Yield = 69%. LC-MS (ESI) m/z: found 338.1 [M+H]<sup>+</sup>; for C<sub>14</sub>H<sub>16</sub>BrN<sub>3</sub>O<sub>2</sub> exact mass calculated 337.0.

**5-Bromo-N-((tetrahydro-2H-pyran-3-yl)methyl)-1H-indazole-3-carboxamide (18).** The title compound was obtained according to general method (A) using 5-bromo-1H-indazole-3-carboxylic acid (0.1 g, 0.415 mmol), (tetrahydro-2H-pyran-3-yl)methanamine (0.055 g, 0.481 mmol), HOBt (0.062 g, 0.456 mmol), DCC (0.092 g, 0.444 mmol). The crude was purified by flash chromatography (SiO<sub>2</sub>, DCM/MeOH), affording 0.10 g of the title product. Yield = 70%. LC-MS (ESI) m/z: found 338.1 [M+H]<sup>+</sup>; for C<sub>14</sub>H<sub>16</sub>BrN<sub>3</sub>O<sub>2</sub> exact mass calculated 337.0.

**5-Bromo-N-((tetrahydrofuran-3-yl)methyl)-1H-indazole-3-carboxamide (19).** The title compound was obtained according to general method (B) using 5-bromo-1H-indazole-3-carboxylic acid (0.2 g, 0.830 mmol), (tetrahydrofuran-3-yl)methanamine (0.084 g, 0.830 mmol), HOBt (0.135 g, 0.996 mmol), EDC.HCl (0.191 g, 0.996 mmol). The crude (0.27 g) was used in the next step without further purification. Yield = 29%. LC-MS (ESI) m/z: found 324.0 [M+H]<sup>+</sup>; for C<sub>13</sub>H<sub>14</sub>BrN<sub>3</sub>O<sub>2</sub> exact mass calculated 323.0.

**5-Bromo-N-((tetrahydrofuran-2-yl)methyl)-1H-indazole-3-carboxamide (20).** The title compound was obtained according to general method (B) using 5-bromo-1H-indazole-3-carboxylic acid (0.2 g, 0.830 mmol), (tetrahydrofuran-2-yl)methanamine (0.084 g, 0.830 mmol), HOBt (0.135 g, 0.996 mmol), EDC.HCl (0.191 g, 0.996 mmol). The crude (0.16 g) was used in the next step without further purification. Yield = 59%. LC-MS (ESI) m/z: found 324.0 [M+H]<sup>+</sup>; for C<sub>13</sub>H<sub>14</sub>BrN<sub>3</sub>O<sub>2</sub> exact mass calculated 323.0.

**5-Bromo-N-(tetrahydro-2H-pyran-4-yl)-1H-indazole-3-carboxamide (21).** The title compound was obtained according to general method (A) using 5-bromo-1H-indazole-3-carboxylic acid (0.1 g, 0.41 mmol), tetrahydro-2H-pyran-4-amine (0.049 g, 0.481 mmol), HOBt (0.062 g, 0.456 mmol), DCC (0.092 g, 0.444 mmol). The crude (0.097 mg) was used in the next step without further purification. Yield: 89%. LC-MS (ESI) m/z: found 324.0 [M+H]<sup>+</sup>; for C<sub>13</sub>H<sub>14</sub>BrN<sub>3</sub>O<sub>2</sub> exact mass calculated 323.0.

**5-Bromo-N-(tetrahydro-2H-pyran-3-yl)-1H-indazole-3-carboxamide (22).** The title compound was obtained according to general method (B) using 5-bromo-1H-indazole-3-carboxylic acid (0.4 g, 1.66 mmol), tetrahydro-2H-pyran-3-amine hydrochloride (0.274 g, 1.991 mmol), HOBt (0.27 g, 1.991 mmol), EDC.HCl (0.38 g, 1.991 mmol). The crude was purified by flash chromatography (SiO<sub>2</sub>, Cyclohexane/EtOAc), affording 0.13 g of the title product. Yield = 21%. LC-MS (ESI) m/z: found 324.0 [M+H]<sup>+</sup>; for C<sub>13</sub>H<sub>14</sub>BrN<sub>3</sub>O<sub>2</sub> exact mass calculated 323.0.

**5-Bromo-N-(tetrahydrofuran-3-yl)-1H-indazole-3-carboxamide (23).** The title compound was obtained according to general method (B) using 5-bromo-1H-indazole-3-carboxylic acid (0.3 g, 1.245 mmol), tetrahydrofuran-3-amine (0.108 g, 1.245 mmol), HOBt (0.202 g, 1.494 mmol), and EDC.HCl (0.286 g, 1.494 mmol). The crude (0.300 g) was used in the next step without further purification. Yield = 78%. LC-MS (ESI) m/z: found 310.0 [M+H]<sup>+</sup>; for C<sub>12</sub>H<sub>12</sub>BrN<sub>3</sub>O<sub>2</sub> exact mass calculated 309.0.

**5-Bromo-N-(1,1-dioxidotetrahydro-2H-thiopyran-4-yl)-1H-indazole-3-carboxamide (24).** The title compound was obtained according to general method (B) using 5-bromo-1H-indazole-3-carboxylic acid (0.3 g, 1.245 mmol), 4-aminotetrahydro-2H-thiopyran 1,1-dioxide (0.185 g, 1.245 mmol), HOBt (0.202 g, 1.494 mmol), EDC.HCl (0.286 g, 1.494 mmol). The crude (0.23 g) was used in the next step without further purification. Yield = 50%. LC-MS (ESI) m/z: found 371.2 [M+H]<sup>+</sup>; for C<sub>13</sub>H<sub>14</sub>BrN<sub>3</sub>O<sub>3</sub>S exact mass calculated 370.9.

**5-Bromo-N-(1,1-dioxidotetrahydrothiophen-3-yl)-1H-indazole-3-carboxamide (25).** The title compound was obtained according to general method (B) using 5-bromo-1H-indazole-3-carboxylic acid (0.3 g, 1.245 mmol), 3-aminotetrahydrothiophene 1,1-dioxide (0.168 g, 1.245 mmol), HOBt (0.202 g, 1.494 mmol), EDC.HCl (0.286 g, 1.494 mmol). The crude (0.22 g) was used in the next step without further purification. Yield = 49%. LC-MS (ESI) m/z: found 357.9 [M+H]<sup>+</sup>; for C<sub>12</sub>H<sub>12</sub>BrN<sub>3</sub>O<sub>3</sub>S exact mass calculated 356.9.

**N-((tetrahydro-2H-pyran-4-yl)methyl)-5-(4,4,5,5-tetramethyl-1,3,2-dioxaborolan-2-yl)-1H-indazole-3-carboxamide (26).** A mixture of 5-bromo-N-((tetrahydro-2H-pyran-4-yl)methyl)-1H-indazole-3-carboxamide **17** (1.5 g, 4.4 mmol), bis(pinacolato)diboron (3.4 g, 13 mmol), and KOAc (0.87 g, 8.9 mmol), in 1,4-dioxane was first degassed with a N<sub>2</sub> stream for 10 minutes and then added with PdCl<sub>2</sub>(dppf) (0.65 g, 0.89 mmol). After purging again with N<sub>2</sub>, the mixture was stirred at 100 °C overnight, then diluted with MeOH and filtered through Celite to remove the insoluble solids. The solvent was evaporated under reduced pressure and the crude was purified by flash chromatography (SiO<sub>2</sub>, DCM/MeOH), affording 0.77 g of the title

product. Yield = 45%. LC-MS (ESI) *m/z*: found 326.1 [ $M_{\text{boronic acid}} + \text{Na}$ ]<sup>+</sup>; for boronic ester  $\text{C}_{20}\text{H}_{28}\text{BN}_3\text{O}_4$  exact mass calculated 385.2, for boronic acid  $\text{C}_{14}\text{H}_{18}\text{BN}_3\text{O}_4$  exact mass calculated 303.1.

*5-(2,3-Difluorophenyl)-N-((tetrahydro-2H-pyran-4-yl)methyl)-1H-indazole-3-carboxamide (2)*. The title compound was obtained according to general method (C) using 5-bromo-*N-((tetrahydro-2H-pyran-4-yl)methyl)-1H-indazole-3-carboxamide* (**17**, 0.107 g, 0.316 mmol), 2,3-difluorophenylboronic acid (0.200 g, 1.266 mmol),  $\text{Cs}_2\text{CO}_3$  (0.412 g, 1.266 mmol),  $\text{PdCl}_2(\text{dppf})$  (0.058 g, 0.079 mmol). The crude was purified by flash chromatography ( $\text{SiO}_2$ , Cyclohexane/EtOAc) to give 0.016 g of the title product. Yield = 14%. LC-MS (ESI) *m/z*: found 372.1 [ $M+H$ ]<sup>+</sup>. HRMS (ESI) *m/z*: found 372.1525 [ $M+H$ ]<sup>+</sup>; for  $\text{C}_{20}\text{H}_{19}\text{F}_2\text{N}_3\text{O}_2$  exact mass calculated 371.1445 (372.1518 [ $M+H$ ]<sup>+</sup>). <sup>1</sup>H NMR (300 MHz,  $\text{DMSO}-d_6$ ):  $\delta$  13.57 (br s, 1H), 8.36 (br s, 1H), 8.25-8.29 (t, 1H, *J*=6.0 Hz), 7.71-7.74 (m, 1H), 7.58-7.62 (m, 1H), 7.28-7.46 (m, 3H), 3.84-3.87 (2H, m), 3.16-3.33 (m, 4H), 1.83-1.91 (m, 1H), 1.60-1.65 (m, 2H), 1.18-1.32 ppm (m, 2H).

*5-(2,3-Difluorophenyl)-N-((tetrahydro-2H-pyran-3-yl)methyl)-1H-indazole-3-carboxamide (3)*. The title compound was obtained according to general method (C) using 5-bromo-*N-((tetrahydro-2H-pyran-3-yl)methyl)-1H-indazole-3-carboxamide* (**18**, 0.107 g, 0.316 mmol), 2,3-difluorophenylboronic acid (0.200 g, 1.266 mmol),  $\text{Cs}_2\text{CO}_3$  (0.412 g, 1.266 mmol),  $\text{PdCl}_2(\text{dppf})$  (0.058 g, 0.079 mmol). The crude was purified by flash chromatography ( $\text{SiO}_2$ , Cyclohexane/EtOAc) to give 0.020 g of the title product. Yield = 16%. LC-MS (ESI) *m/z*: found 372.1 [ $M+H$ ]<sup>+</sup>. HRMS (ESI) *m/z*: found 372.1537 [ $M+H$ ]<sup>+</sup>; for  $\text{C}_{20}\text{H}_{19}\text{F}_2\text{N}_3\text{O}_2$  exact mass calculated 371.1445 (372.1518 [ $M+H$ ]<sup>+</sup>). <sup>1</sup>H NMR (400 MHz,  $\text{DMSO}-d_6$ ):  $\delta$  13.67 (br s, 1H), 8.50 (t, 1H, *J*=6.1 Hz), 8.34 (s, 1H), 7.73 (dd, 1H, *J*=0.9, 8.7 Hz), 7.60 (td, 1H, *J*=1.7, 8.6 Hz), 7.28-7.44 (m, 3H), 3.67-3.79 (m, 2H), 3.07-3.33 (m, 4H), 1.81-1.91 (m, 1H), 1.74-1.79 (m, 1H), 1.54-1.62 (m, 1H), 1.38-1.49 (m, 1H), 1.19-1.29 ppm (m, 1H). <sup>13</sup>C NMR (101 MHz,  $\text{DMSO}-d_6$ ):  $\delta$  162.8, 151.5, 147.1, 141.1, 139.2, 131.3, 128.3, 128.0, 126.6, 125.6, 122.4, 122.2, 116.7, 111.6, 71.2, 68.0, 41.0, 36.6, 27.5, 25.3 ppm.

*5-(2,3-Difluorophenyl)-N-((tetrahydrofuran-3-yl)methyl)-1H-indazole-3-carboxamide (4)*. The title compound was obtained according to general method (C) using 5-bromo-*N-((tetrahydrofuran-3-yl)methyl)-1H-indazole-3-carboxamide* (**19**, 0.269 g, 0.830 mmol), 2,3-difluorophenylboronic acid (0.262 g, 1.660 mmol),  $\text{Cs}_2\text{CO}_3$  (0.541 g, 1.660 mmol), and  $\text{PdCl}_2(\text{dppf})$  (0.061 g, 0.083 mmol). The crude was purified by flash chromatography ( $\text{SiO}_2$ , Cyclohexane/EtOAc) to give 0.015 g of the title product. Yield = 5%. LC-MS (ESI) *m/z*: found 358.1 [ $M+H$ ]<sup>+</sup>. HRMS (ESI) *m/z*: found 358.1372 [ $M+H$ ]<sup>+</sup>; for  $\text{C}_{19}\text{H}_{17}\text{F}_2\text{N}_3\text{O}_2$  exact mass calculated 357.1289 (358.1362 [ $M+H$ ]<sup>+</sup>). <sup>1</sup>H NMR (400 MHz,  $\text{DMSO}-d_6$ ):  $\delta$  13.72 (br s, 1H), 8.59-8.62 (m, 1H), 8.33 (br s, 1H), 7.74 (d, 1H, *J*=8.6 Hz), 7.61 (d, 1H, *J*=8.8 Hz), 7.40-7.47 (m, 2H), 7.32-7.38 (m, 1H), 3.57-3.76 (m, 3H), 3.47-3.51 (m, 1H), 3.26-3.31 (m, 2H), 2.52-2.56 (m, 1H), 1.89-1.97 (m, 1H), 1.60-1.67 ppm (m, 1H).

*5-(2,3-Difluorophenyl)-N-((tetrahydrofuran-2-yl)methyl)-1H-indazole-3-carboxamide (5)*. The title compound was obtained according to general method (C) using 5-bromo-*N-((tetrahydrofuran-2-yl)methyl)-1H-indazole-3-carboxamide* (**20**, 0.158 g, 0.487 mmol), 2,3-difluorophenylboronic acid (0.154 g, 0.975 mmol),  $\text{Cs}_2\text{CO}_3$  (0.318 g, 0.975 mmol),  $\text{PdCl}_2(\text{dppf})$  (0.036 g, 0.049 mmol). The crude was purified by flash chromatography ( $\text{SiO}_2$ , Cyclohexane/EtOAc) to give 0.060 g of the title product. Yield = 31%. LC-MS (ESI) *m/z*: found 358.1 [ $M+H$ ]<sup>+</sup>. HRMS (ESI) *m/z*: found 358.1365 [ $M+H$ ]<sup>+</sup>; for  $\text{C}_{19}\text{H}_{17}\text{F}_2\text{N}_3\text{O}_2$  exact mass calculated 357.1289 (358.1362 [ $M+H$ ]<sup>+</sup>). <sup>1</sup>H NMR (500 MHz,  $\text{DMSO}-d_6$ ):  $\delta$  13.75 (br s, 1H), 8.35 (s, 1H), 8.29 (t, 1H, *J*=10.0 Hz), 7.74 (d, 1H, *J*=8.7 Hz), 7.62 (d, 1H, *J*=8.7 Hz), 7.39-7.48 (m, 2H), 7.31-7.35 (m, 1H), 4.01-4.06 (m, 1H), 3.78-3.82 (m, 1H), 3.62-3.66 (m, 1H), 3.37 (t, 1H, *J*=6.0 Hz), 1.77-1.94 (m, 3H), 1.61-1.67 ppm (m, 1H). <sup>13</sup>C NMR (126 MHz,  $\text{DMSO}-d_6$ ):  $\delta$  162.1, 150.3, 146.8, 140.7, 138.6, 130.8, 127.9, 127.6, 126.1, 125.1, 121.9, 121.7, 116.3, 111.2, 77.0, 67.1, 42.4, 28.5, 25.1 ppm.

*5-(2,3-Difluorophenyl)-N-((tetrahydro-2H-pyran-4-yl)-1H-indazole-3-carboxamide (6)*. The title compound was obtained according to general method (C) using 5-bromo-*N-((tetrahydro-2H-pyran-4-yl)-1H-indazole-3-carboxamide* (**21**, 0.097 g, 0.299 mmol), 2,3-difluorophenylboronic acid (0.095 g, 0.598 mmol),  $\text{Cs}_2\text{CO}_3$  (0.146 g, 0.448 mmol), and  $\text{PdCl}_2(\text{dppf})$  (0.022 g, 0.030 mmol). The crude was purified by flash chromatography ( $\text{SiO}_2$ , Cyclohexane/EtOAc) to give 0.040 g of the title product. Yield = 37%. LC-MS (ESI) *m/z*: found 358.1 [ $M+H$ ]<sup>+</sup>. HRMS (ESI) *m/z*: found 358.1367 [ $M+H$ ]<sup>+</sup>; for  $\text{C}_{19}\text{H}_{17}\text{F}_2\text{N}_3\text{O}_2$  exact mass calculated 357.1289 (358.1362 [ $M+H$ ]<sup>+</sup>). <sup>1</sup>H NMR (500 MHz,  $\text{DMSO}-d_6$ ):  $\delta$  13.74 (br s, 1H), 8.37 (s, 1H), 8.35 (s, 1H), 7.74 (d, 1H, *J*=8.7 Hz), 7.62 (d, 1H, *J*=8.7 Hz), 7.39-7.48 (m, 2H), 7.31-7.35 (m, 1H), 4.05-4.12 (m, 1H), 3.88-3.90 (m, 2H), 3.37-3.42 (m, 2H), 1.66-1.76 ppm (m, 4H). <sup>13</sup>C NMR (126 MHz,  $\text{DMSO}-d_6$ ):  $\delta$  161.5, 150.4, 147.2, 140.8, 139.0, 131.0, 127.9, 127.7, 126.2, 125.3, 122.1, 121.9, 116.4, 111.3, 66.4, 45.2, 32.5 ppm.

*5-(2,3-Difluorophenyl)-N-((tetrahydro-2H-pyran-3-yl)-1H-indazole-3-carboxamide (7)*. The title compound was obtained according to general method (C) using 5-bromo-*N-((tetrahydro-2H-pyran-3-yl)-1H-indazole-3-carboxamide* (**22**, 0.130 g, 0.401 mmol), 2,3-difluorophenylboronic acid (0.127 g, 0.802 mmol),  $\text{Cs}_2\text{CO}_3$  (0.26 g, 0.80 mmol),  $\text{PdCl}_2(\text{dppf})$  (0.03 g, 0.04 mmol). The crude was purified by flash chromatography ( $\text{SiO}_2$ , DCM/MeOH) to give 0.049 g of the title product. Yield = 34%. LC-MS (ESI) *m/z*: found 358.1 [ $M+H$ ]<sup>+</sup>. HRMS (ESI) *m/z*: found 358.1345 [ $M+H$ ]<sup>+</sup>; for  $\text{C}_{19}\text{H}_{17}\text{F}_2\text{N}_3\text{O}_2$  exact mass calculated 357.1289 (358.1362 [ $M+H$ ]<sup>+</sup>). <sup>1</sup>H NMR (400 MHz,  $\text{DMSO}-d_6$ ):  $\delta$  13.76 (br s, 1H), 8.34 (br s, 1H), 8.17 (d, 1H, *J*=8.4 Hz), 7.73-7.76 (m, 1H), 7.59-7.63 (m, 1H), 7.30-7.50 (m, 3H), 3.95-4.04 (m, 1H), 3.70-3.81 (m, 2H), 3.27-3.37 (m, 2H), 1.86-1.94 (m, 1H), 1.56-1.79 ppm (m, 3H).



5-(2,3-Difluorophenyl)-N-(tetrahydrofuran-3-yl)-1H-indazole-3-carboxamide (**8**). The title compound was obtained according to general method (C) using 5-bromo-N-(tetrahydrofuran-3-yl)-1H-indazole-3-carboxamide (**23**, 0.169 g, 0.545 mmol), 2,3-difluorophenylboronic acid (0.172 g, 1.090 mmol), Cs<sub>2</sub>CO<sub>3</sub> (0.26 g, 0.80 mmol), PdCl<sub>2</sub>(dppf) (0.03 g, 0.04 mmol). The crude was purified by flash chromatography (SiO<sub>2</sub>, Cyclohexane/EtOAc) to give 0.027 g of the title product. Yield = 14%. LC-MS (ESI) m/z: found 344.1 [M+H]<sup>+</sup>. HRMS (ESI) m/z: found 344.1199 [M+H]<sup>+</sup>; for C<sub>18</sub>H<sub>15</sub>F<sub>2</sub>N<sub>3</sub>O<sub>2</sub> exact mass calculated 343.1132 (344.1205 [M+H]<sup>+</sup>). <sup>1</sup>H NMR (400 MHz, CDCl<sub>3</sub>): δ 8.53 (s, 1H), 7.61-7.65 (m, 1H), 7.55-7.58 (m, 1H), 7.30-7.34 (m, 1H), 7.12-7.17 (m, 2H), 4.75-4.83 (m, 1H), 3.96-4.05 (m, 2H), 3.81-3.90 (m, 2H), 2.33-2.42 (m, 1H), 1.96-1.99 ppm (m, 1H).

5-(2,3-Difluorophenyl)-N-(1,1-dioxidotetrahydro-2H-thiopyran-4-yl)-1H-indazole-3-carboxamide (**9**). The title compound was obtained according to general method (C) using 5-bromo-N-(1,1-dioxidotetrahydro-2H-thiopyran-4-yl)-1H-indazole-3-carboxamide (**24**, 0.23 g, 0.614 mmol), 2,3-difluorophenylboronic acid (0.194 g, 1.228 mmol), Cs<sub>2</sub>CO<sub>3</sub> (0.400 g, 1.228 mmol), PdCl<sub>2</sub>(dppf) (0.045 g, 0.061 mmol). The crude was purified by flash chromatography (SiO<sub>2</sub>, Cyclohexane/EtOAc) to give 0.075 g of the title product. Yield = 30.2%. LC-MS (ESI) m/z: found 406.1 [M+H]<sup>+</sup>. HRMS (ESI) m/z: found 406.1024 [M+H]<sup>+</sup>; for C<sub>19</sub>H<sub>17</sub>F<sub>2</sub>N<sub>3</sub>O<sub>3</sub>S exact mass calculated 405.0959 (406.1031 [M+H]<sup>+</sup>). <sup>1</sup>H NMR (500 MHz, DMSO-d<sub>6</sub>): δ 13.77 (br s, 1H), 8.62 (d, 1H, J=8.2 Hz), 8.34 (s, 1H), 7.75 (d, 1H, J=8.7 Hz), 7.62 (d, 1H, J=8.7 Hz), 7.32-7.46 (m, 3H), 4.25-4.28 (m, 1H), 3.36-3.40 (m, 2H), 3.10-3.13 (m, 2H), 2.11-2.22 ppm (m, 4H). <sup>13</sup>C NMR (126 MHz, DMSO-d<sub>6</sub>): δ: 162.1, 150.8, 147.6, 141.1, 139.1, 131.3, 128.3, 128.1, 126.6, 125.6, 122.5, 122.4, 116.8, 111.6, 49.6, 44.9, 29.7 ppm.

5-(2,3-Difluorophenyl)-N-(1,1-dioxidotetrahydrothiophen-3-yl)-1H-indazole-3-carboxamide (**10**). The title compound was obtained according to general method (C) using 5-bromo-N-(1,1-dioxidotetrahydrothiophen-3-yl)-1H-indazole-3-carboxamide (**25**, 0.22 g, 0.614 mmol), 2,3-difluorophenylboronic acid (0.194 g, 1.228 mmol), Cs<sub>2</sub>CO<sub>3</sub> (0.400 g, 1.228 mmol), PdCl<sub>2</sub>(dppf) (0.045 g, 0.061 mmol). The crude was purified by flash chromatography (SiO<sub>2</sub>, Cyclohexane/EtOAc) to give 0.072 g of the title product. Yield = 28.5%. LC-MS (ESI) m/z: found 392.0 [M+H]<sup>+</sup>. HRMS (ESI) m/z: found 392.0876 [M+H]<sup>+</sup>; for C<sub>18</sub>H<sub>15</sub>F<sub>2</sub>N<sub>3</sub>O<sub>3</sub>S exact mass calculated 391.0802 (392.0875 [M+H]<sup>+</sup>). <sup>1</sup>H NMR (400 MHz, DMSO-d<sub>6</sub>): δ 13.84 (br s, 1H), 8.88 (d, 1H, J=7.8 Hz), 8.35 (s, 1H), 7.75-7.78 (m, 1H), 7.62-7.65 (m, 1H), 7.28-7.50 (m, 3H), 4.73-4.82 (m, 1H), 3.44-3.52 (m, 1H), 3.34-3.40 (m, 1H), 3.16-3.23 (m, 2H), 2.38-2.44 (m, 1H), 2.26-2.33 ppm (m, 1H).

5-(Pyridin-3-yl)-N-((tetrahydro-2H-pyran-4-yl)methyl)-1H-indazole-3-carboxamide (**11**). The title compound was obtained according to general method (D) using 5-bromo-N-((tetrahydro-2H-pyran-4-yl)methyl)-1H-indazole-3-carboxamide (**17**, 0.150 g, 0.44 mmol), 3-pyridylboronic acid (0.11 g, 0.89 mmol), CsF (0.13 g, 0.89 mmol), and PdCl<sub>2</sub>(dppf) (0.033 g, 0.044 mmol). The crude was purified by flash chromatography (SiO<sub>2</sub>, DCM/MeOH) to give 0.053 g of the title product. Yield = 35%. LC-MS (ESI) m/z: found 337.2 [M+H]<sup>+</sup>. HRMS (ESI) m/z: found 337.1660 [M+H]<sup>+</sup>; for C<sub>19</sub>H<sub>20</sub>N<sub>4</sub>O<sub>2</sub> exact mass calculated 336.1586 (337.1659 [M+H]<sup>+</sup>). <sup>1</sup>H NMR (300 MHz, DMSO-d<sub>6</sub>): δ 13.67 (s, 1H), 8.90 (d, 1H, J=2.1 Hz), 8.58 (dd, 1H, J=1.4, 4.7 Hz), 8.43-8.47 (m, 2H), 8.08-8.12 (m, 1H), 7.72-7.80 (m, 2H), 7.51 (dd, 1H, J=4.7, 7.8 Hz), 3.85 (br dd, 2H, J=2.3, 11.3 Hz), 3.20-3.31 (m, 4H), 1.79-1.94 (m, 1H), 1.61 (dd, 2H, J=1.7, 12.9 Hz), 1.16-1.29 ppm (m, 2H).

5-(5-Isopropoxy-pyridin-3-yl)-N-((tetrahydro-2H-pyran-4-yl)methyl)-1H-indazole-3-carboxamide (**12**). The title compound was obtained according to general method (D) using 5-bromo-N-((tetrahydro-2H-pyran-4-yl)methyl)-1H-indazole-3-carboxamide (**17**, 0.1 g, 0.296 mmol), (5-isopropoxy-pyridin-3-yl)boronic acid (0.080 g, 0.44 mmol), CsF (0.09 g, 0.59 mmol), and PdCl<sub>2</sub>(dppf) (0.024 g, 0.030 mmol). The crude was purified by flash chromatography (SiO<sub>2</sub>, DCM/MeOH) to give 0.07 g of the title product. Yield = 63%. LC-MS (ESI) m/z: found 395.2 [M+H]<sup>+</sup>. HRMS (ESI) m/z: found 395.2082 [M+H]<sup>+</sup>; for C<sub>22</sub>H<sub>26</sub>N<sub>4</sub>O<sub>3</sub> exact mass calculated 394.2005 (395.2078 [M+H]<sup>+</sup>). <sup>1</sup>H NMR (300 MHz, DMSO-d<sub>6</sub>): δ 13.67 (br s, 1H), 8.42-8.49 (m, 3H), 8.26 (d, 1H, J=2.7 Hz), 7.71-7.79 (m, 2H), 7.60 (t, 1H, J=2.2 Hz), 4.80-4.92 (m, 1H), 3.83-3.87 (m, 2H), 3.21-3.31 (m, 4H), 1.80-1.92 (m, 1H), 1.58-1.63 (m, 2H), 1.34 (d, 6H, J=6.0 Hz), 1.11-1.30 (m, 2H). <sup>13</sup>C NMR (75 MHz, DMSO-d<sub>6</sub>): δ: 162.2, 153.8, 140.8, 139.8, 138.8, 137.4, 137.0, 131.1, 126.3, 122.1, 120.2, 119.9, 111.4, 70.0, 66.7, 44.0, 35.0, 30.5, 21.7 ppm.

5-(5-(Methoxymethyl)pyridin-3-yl)-N-((tetrahydro-2H-pyran-4-yl)methyl)-1H-indazole-3-carboxamide (**13**). The title compound was obtained according to general method (D) using N-((tetrahydro-2H-pyran-4-yl)methyl)-5-(4,4,5,5-tetramethyl-1,3,2-dioxaborolan-2-yl)-1H-indazole-3-carboxamide (**26**, 0.2 g, 0.29 mmol), 3-bromo-5-(methoxymethyl)pyridine (0.12 g, 0.57 mmol), CsF (0.087 g, 0.57 mmol), and PdCl<sub>2</sub>(dppf) (0.012 g, 0.014 mmol). The crude was purified by reverse phase chromatography (C18, NH<sub>4</sub>HCO<sub>3</sub>/CH<sub>3</sub>CN) to give 0.015 g of the title product. Yield = 13%. LC-MS (ESI) m/z: found 381.1 [M+H]<sup>+</sup>. HRMS (ESI) m/z: found 381.1925 [M+H]<sup>+</sup>; for C<sub>21</sub>H<sub>24</sub>N<sub>4</sub>O<sub>3</sub> exact mass calculated 380.1848 (381.1921 [M+H]<sup>+</sup>). <sup>1</sup>H NMR (300 MHz, DMSO-d<sub>6</sub>): δ 13.69 (s, 1H), 8.85 (d, 1H, J=2.2 Hz), 8.54 (d, 1H, J=1.8 Hz), 8.48-8.51 (m, 1H), 8.45-8.46 (m, 1H), 8.03 (t, 1H, J=2.1 Hz), 7.78-7.82 (m, 1H), 7.73-7.76 (m, 1H), 4.57 (s, 2H), 3.85 (dd, 2H, J=2.4, 11.4 Hz), 3.38 (s, 3H), 3.17-3.32 (m, 4H), 1.81-1.93 (m, 1H), 1.61 (dd, 2H, J=1.9, 12.9 Hz), 1.16-1.30 ppm (m, 2H). <sup>13</sup>C NMR (75 MHz, DMSO-d<sub>6</sub>): δ: 162.2, 147.3, 146.9, 140.8, 138.8, 135.7, 133.9, 133.4, 131.1, 126.0, 122.2, 119.8, 111.5, 71.0, 66.7, 57.8, 44.0, 35.0, 30.5 ppm.

5-(5-(Hydroxymethyl)pyridin-3-yl)-N-((tetrahydro-2H-pyran-4-yl)methyl)-1H-indazole-3-carboxamide (**14**). The title compound was obtained according to general method (D) using N-((tetrahydro-2H-pyran-4-yl)methyl)-5-(4,4,5,5-tetramethyl-1,3,2-dioxaborolan-2-yl)-1H-indazole-3-carboxamide (**26**, 0.1 g, 0.26 mmol), (5-bromopyridin-3-yl)methanol (0.098 g, 0.52

mmol), CsF (0.079 g, 0.52 mmol), PdCl<sub>2</sub>(dppf) (0.019 g, 0.026 mmol). The crude was purified by reverse phase chromatography (C18, NH<sub>4</sub>HCO<sub>3</sub>/CH<sub>3</sub>CN) to give 0.013 g of the title product. Yield = 13%. LC-MS (ESI) m/z: found 367.1 [M+H]<sup>+</sup>. HRMS (ESI) m/z: found 367.1767 [M+H]<sup>+</sup>; for C<sub>20</sub>H<sub>22</sub>N<sub>4</sub>O<sub>3</sub> exact mass calculated 366.1692 (367.1765 [M+H]<sup>+</sup>). <sup>1</sup>H NMR (300 MHz, DMSO-d<sub>6</sub>) δ: 13.68 (br s, 1H), 8.79 (d, 1H, *J*=1.6 Hz), 8.46-8.53 (m, 3H), 8.03 (s, 1H), 7.73-7.81 (m, 2H), 5.42 (t, 1H, *J*=5.7 Hz), 4.65 (d, 2H, *J*=5.5 Hz), 3.85 (br dd, 2H, *J*=2.4, 11.3 Hz), 3.21-3.27 (m, 4H), 1.83-1.91 (m, 1H), 1.61 (br d, 2H, *J*=12.6 Hz), 1.23 ppm (m, 2H). <sup>13</sup>C NMR (75 MHz, DMSO-d<sub>6</sub>) δ: 162.3, 146.7, 146.2, 140.8, 138.8, 137.8, 135.5, 132.4, 131.3, 125.9, 122.2, 119.7, 111.5, 66.7, 60.6, 44.0, 35.0, 30.5 ppm.

*5-(4-(Methoxymethyl)pyridin-3-yl)-N-((tetrahydro-2H-pyran-4-yl)methyl)-1H-indazole-3-carboxamide* (**15**). The title compound was obtained according to general method (D) using *N-((tetrahydro-2H-pyran-4-yl)methyl)-5-(4,4,5,5-tetramethyl-1,3,2-dioxaborolan-2-yl)-1H-indazole-3-carboxamide* (**26**, 0.2 g, 0.29 mmol), 3-bromo-4-(methoxymethyl)pyridine (0.079 g, 0.39 mmol), CsF (0.079 g, 0.52 mmol), and PdCl<sub>2</sub>(dppf) (0.021 g, 0.026 mmol). The crude was purified by column reverse phase C18 (NH<sub>4</sub>HCO<sub>3</sub>/CH<sub>3</sub>CN) to give 0.046 g of the title product. Yield = 6%. LC-MS (ESI) m/z: found 381.1 [M+H]<sup>+</sup>. HRMS (ESI) m/z: found 381.1927 [M+H]<sup>+</sup>; for C<sub>21</sub>H<sub>24</sub>N<sub>4</sub>O<sub>3</sub> exact mass calculated 380.1848 (381.1921 [M+H]<sup>+</sup>). <sup>1</sup>H NMR (400 MHz, CD<sub>3</sub>OD): δ 8.54 (d, *J* = 5.2 Hz, 1H), 8.46 (s, 1H), 8.21-8.23 (m, 1H), 7.69 (dd, *J* = 8.6, 0.8 Hz, 1H), 7.62-7.65 (m, 1H), 7.43 (dd, *J* = 8.6, 1.7 Hz, 1H), 4.45 (s, 2H), 3.93-3.98 (m, 2H), 3.41 (td, *J* = 11.9, 2.1 Hz, 2H), 3.35 (s, 3H), 3.34 (d, *J* = 7.0 Hz, 2H), 1.87-1.98 (m, 1H), 1.68-1.75 (m, 2H), 1.31-1.43 ppm (m, 2H).

*5-(4-(Hydroxymethyl)pyridin-3-yl)-N-((tetrahydro-2H-pyran-4-yl)methyl)-1H-indazole-3-carboxamide* (**16**). The title compound was obtained according to general method (E) using *N-((tetrahydro-2H-pyran-4-yl)methyl)-5-(4,4,5,5-tetramethyl-1,3,2-dioxaborolan-2-yl)-1H-indazole-3-carboxamide* (**26**, 0.1 g, 0.26 mmol), 3-bromopyridine-4-carbaldehyde (0.053 g, 0.29 mmol), Na<sub>2</sub>CO<sub>3</sub> (0.055 g, 0.52 mmol), and Pd(PPh<sub>3</sub>)<sub>4</sub> (0.015 g, 0.013 mmol). The crude was purified by flash chromatography (SiO<sub>2</sub>, DCM/MeOH) to give 0.013 g of the title product. Yield = 14%. LC-MS (ESI) m/z: found 367.1 [M+H]<sup>+</sup>. HRMS (ESI) m/z: found 367.1760 [M+H]<sup>+</sup>; for C<sub>20</sub>H<sub>22</sub>N<sub>4</sub>O<sub>3</sub> exact mass calculated 366.1692 (367.1765 [M+H]<sup>+</sup>). <sup>1</sup>H NMR (400 MHz, CD<sub>3</sub>OD): δ 8.53 (d, *J* = 5.2 Hz, 1H), 8.40 (bs, 1H), 8.18-8.19 (m, 1H), 7.72-7.73 (m, 1H), 7.68-7.70 (m, 1H), 7.41 (dd, *J* = 8.6, 1.6 Hz, 1H), 4.61 (s, 2H), 3.94 (dd, *J* = 11.4, 2.8 Hz, 2H), 3.38-3.44 (m, 2H), 3.32 (d, *J* = 7.0 Hz, 2H), 1.85-1.99 (m, 1H), 1.65-1.75 (m, 2H), 1.24-1.42 ppm (m, 2H).

## X-RAY CRYSTAL STRUCTURE OF GSK-3B KINASE IN COMPLEX WITH COMPOUND 1

Crystals of GSK-3β in complex with ligand **1** were obtained by mixing 0.5 μl protein solution (4 mg/mL in 20 mM MOPS pH 7.0, 98 mM NaCl, 10% (v/v) glycerol, 1 mM DTT, 1x Phosphatase Inhibitor Cocktail preincubated with 5 mM ligand **1**) with 0.5 μL reservoir solution (18% (w/v) PEG8000, 0.13 M NaCl, 0.1 M Tris Acetate pH 8.0) using sitting drop vapor diffusion method at 277 K. Before flash freezing in liquid nitrogen crystals were cryo-protected by reservoir solution supplemented with 25% (v/v) glycerol.

Diffraction data were collected at 100 K at the Swiss Light Source (SLS, Villigen, Switzerland). Data were processed to 2.14 Å resolution using the programs XDS and XSCALE.<sup>1</sup> The crystals belong to space group C222<sub>1</sub> containing 1 GSK-3β molecule per asymmetric unit. The phase information necessary to determine and analyze the structure of GSK-3β in complex with ligand **1** was obtained by molecular replacement using the program PHASER<sup>2</sup> and a previously solved GSK-3β structure as search model. CORINA<sup>3</sup> was used for ligand parameterization. Subsequent model building and refinement was performed with the software packages CCP4 and COOT.<sup>4-5</sup> For the measure of the free R-factor a measure to cross-validate correctness of the final model, about 5.6% of measured reflections were excluded from the refinement procedure (see table below). Several rounds of manual model building in COOT and bulk solvent correction, positional, B-factor and TLS refinement using REFMAC yielded the final model.<sup>4-5</sup> Data collection and model statistics are shown in the table below. The atomic coordinates and structure factors have been deposited in the Protein Data Bank, www.pdb.org (PDB ID code 6TCU).

| Ligand             | <b>1</b>              |
|--------------------|-----------------------|
| X-ray source       | PXI/X06SA (SLS)       |
| Wavelength [Å]     | 1.0000                |
| Detector           | EIGER X 16M           |
| Temperature [K]    | 100                   |
| Space group        | C 2 2 2 <sub>1</sub>  |
| Cell: a; b; c; [Å] | 84.78; 107.85; 104.23 |
| a; b; c; [°]       | 90.0; 90.0; 90.0      |
| Resolution [Å]     | 2.14 (2.39-2.14)      |
| Unique reflections | 26305 (7373)          |
| Multiplicity       | 4.3 (4.3)             |

|                                       |              |
|---------------------------------------|--------------|
| Completeness [%]                      | 98.5 (99.3)  |
| R <sub>sym</sub> [%]                  | 3.5 (44.3)   |
| R <sub>meas</sub> [%]                 | 4.0 (50.7)   |
| CC1/2                                 | 1.00 (0.856) |
| Mean(I)/sd                            | 20.08 (3.52) |
| Number of reflections (working /test) | 24826 / 1478 |
| Rcryst [%]                            | 20.2         |
| Rfree[%]2                             | 24.0         |
| Total number of atoms:                |              |
| Protein                               | 2814         |
| Water                                 | 87           |
| Ligand 1                              | 31           |
| Acetate                               | 8            |
| Deviation from ideal geometry:        |              |
| Bond lengths [Å]                      | 0.011        |
| Bond angles [°]                       | 1.50         |
| Bonded B's [Å <sup>2</sup> ]          | 3.7          |
| Ramachandran plot:                    |              |
| Most favoured regions [%]             | 90.5         |
| Additional allowed regions [%]        | 8.9          |
| Generously allowed regions [%]        | 0.3          |
| Disallowed regions [%]                | 0.3          |

## DOCKING MATERIAL

The coordinates of the X-ray structures of GSK-3 $\beta$  in complex with **1** (PDB ID: 6TCU) were used for ligand docking of **14**. Glide module of the Schrödinger molecular simulation package was used.<sup>6</sup> The protein structure for ligand docking was prepared with Protein Preparation Wizard. The ligand used in this study was converted to 3D structure and prepared in terms of the most probable protonation states and tautomers with Schrödinger's LigPrep tool.<sup>7</sup> A conformational search was also carried out using ConfGen with default setting.<sup>8</sup> The resulting 64 conformers constituted the input dataset for the subsequent ligand docking.

The binding site was defined by a box of 10 Å centered on the centroid of the co-crystallized inhibitor. Default setting was used to prepare the receptor grid. In addition, we treated thiol and hydroxyl groups of Tyr134, Thr138 and Cys199 as rotatable (flexible) groups. Three H-bond constraints were defined being the carbonyl oxygen of the hinge residues Asp133 and Val135, and the hydrogen of the NH- group of Val135. By using this setting, we required that certain receptor-ligand hydrogen bonds crucial for compound activity were formed. Glide SP protocol was used to dock analog **14**. In addition to the default settings, we used the enhanced sampling option to enhance the sampling of conformational space by adding variations on the input structure to the conformational search. We also included aromatic ligand hydrogen atoms as donors. When docking ligands, all H-bond constraints needed to be satisfied.

## MD SETUP

The best scored binding pose of **14** within the ATP binding site of GSK-3 $\beta$  (docking score=-9.778 kcal/mol) was processed in a 500 ns MD simulation using the graphics processing unit (GPU) tool of the Desmond MD package as supplied with the Schrödinger 2019-2 suite.<sup>9</sup> Water molecules within the binding site were preserved from the original crystal structure, thus easing the burden of solvent equilibration in critical areas. The Desmond System Builder included in the Schrödinger software suite was used to create a fully solvated system ready for MD simulation. The system was solvated with simple point charge (SPC) waters and a cubic solvation box with a 10 Å buffer around the original complex. The system was electrostatically neutralized by adding Na<sup>+</sup> ions in defined positions by using the ion placement option. Default parameters of OPLS-3e forcefield were used. The prepared systems consisted of approximately 63,300 atoms. The MD simulation protocol followed an extended relaxation schedule consisting of the following steps:

1. 100 ps, constant-volume ensemble (NVT) (T= 10 K); 50 kcal/mol/Å<sup>2</sup> restraints on the solute heavy atoms;
2. 120 ps, NVT (T= 10 K); 50 kcal/mol/Å<sup>2</sup> restraints on the solute heavy atoms;
3. 120 ps, constant-pressure ensemble (NPT) (T=10K, P= 1 atm); 50 kcal/mol/Å<sup>2</sup> restraints on the solute heavy atoms;
4. 120 ps, NPT (T= 300 K, P= 1 atm); 50 kcal/mol/Å<sup>2</sup> restraints on the solute heavy atoms;
5. 2400 ps, NPT (T= 300 K,P= 1 atm); unrestrained;
6. 500 ns, NPT (T= 300 K,P= 1 atm); unrestrained.

The production simulation timescale allowed reasonable sampling of solvent and local motions in a reasonable amount of GPU time. The analysis of the MD trajectory was performed with the Simulation Interaction Diagram tool within the Maestro environment of the Schrödinger suite.<sup>9</sup>

### ENZYMATIC GSK-3 $\beta$ ASSAY

Human recombinant enzyme (Carna Bioscience, Kobe, Japan) was incubated for 90 minutes at 22°C in the presence of compounds or vehicle in a reaction buffer containing ATP plus unphosphorylated specific substrate peptide. Substrate phosphorylation was measured by LANCE technology (PerkinElmer, CT, USA). Compounds were tested at five concentrations ranging from 1 nM to 10  $\mu$ M with 10-fold dilutions in duplicate. Staurosporine was used as internal reference compound. The IC<sub>50</sub> values (concentration causing a half-maximal inhibition of control specific activity), 95% Confidence Intervals (CI) and Hill coefficients (nH) were determined by non-linear regression analysis of the inhibition curves generated with mean replicate values using Hill equation curve fitting.

### hERG ASSAY

Using previously described methods,<sup>10</sup> compounds **1-16** were assayed on hERG CHO-K1 cell line by automated whole-cell patch clamp at Eurofins Panlabs, St. Charles, MO, USA. Compounds were tested at five concentrations ranging from 10 nM to 100  $\mu$ M with 10-fold dilutions in duplicate. E-4031 was used as internal reference compound. The degree of inhibition (%) of tail current was obtained by measuring the tail current amplitude, which was induced by a one second test pulse to -40 mV after a two second pulse to +20 mV, before and after drug incubation (the difference current was normalized to control and multiplied by 100 to obtain the percent of inhibition).

Concentration (log) response curves were fitted to a logistic equation (three parameters assuming complete block of the current at very high test compound concentrations) to generate estimates of IC<sub>50</sub> values. The concentration-response relationship of each compound was constructed from the percentage reductions of current amplitude by sequential concentrations.

### CELLULAR GSK-3 $\beta$ ASSAY

Compound **14** was tested in full dose response at eight concentrations ranging from 10 nM to 30  $\mu$ M with 3-fold dilutions in quadruplicate on recombinant human embryonic kidney (HEK) cells stably transfected with both Tau protein and GSK-3 $\beta$  (T-REx/MAPT+GSK-3 $\beta$ -ISO2\_K3) cell line (Axxam S.p.A., Bresso, Italy) to evaluate activity on GSK-3 $\beta$  (GSK-3 $\beta$  Assay Protocol). In parallel the possible toxic effect of compound **14** was also evaluated on the same cells (Cell Viability Protocol). *N*-(4-Methoxybenzyl)-*N'*-(5-nitro-1,3-thiazol-2-yl)urea (AR-A014418), a selective GSK-3 $\beta$  inhibitor was used as reference compound.

**GSK-3 $\beta$  Assay Protocol.** HEK T-REx/MAPT+GSK-3 $\beta$ -ISO2\_K3 cells were seeded at 10,000 cells/well on poly-D-lysine coated black/clear bottom 384 V bottom plate in complete medium. 24 hours after seeding, medium was replaced with complete medium supplemented with 1  $\mu$ g/mL doxycycline, to induce GSK-3 $\beta$  expression. The cells were incubated with compound **14** at tested concentrations for 18 hours at 37°C, then lysed and processed for the detection of phosphorylated Tau protein (PHERAstar reader).

**Cell Viability Protocol.** HEK T-REx/MAPT+GSK-3 $\beta$ -ISO2\_K3 cells were seeded at 10,000 cells/well on poly-D-lysine coated black/clear bottom 384 V bottom plate in complete medium. 24 hours after seeding, medium was replaced with complete medium supplemented with 1  $\mu$ g/mL doxycycline, to induce GSK-3 $\beta$  expression. The cells were incubated with compound **14** at tested concentrations for 18 hours at 37°C, then CellTiter-Glo® reagent was added, and the signal of the emitted luminescence was recorded at FLIPR<sub>TETRA</sub>.

The percent values of activity with respect to control (untreated cells) were calculated. IC<sub>50</sub> curves were generated using Screener 13.0.5 software.

### IN VITRO ADME METHODS

**Aqueous solubility assay (PBS, pH 7.4).** Test compound was dissolved in DMSO as stock solution and then added to isotonic buffer (pH 7.4) at a concentration of 200  $\mu$ M (2% DMSO final concentration). After a 24 hours incubation under shaking at room temperature, dissolved compound is measured by a chromatographic procedure with photodiode array detection. Metoprolol tartrate, rifampicin, ketoconazole, phenytoin, haloperidol, simvastatin, diethylstilbestrol and tamoxifen were used as reference compounds for different solubility degrees.

**Plasma protein binding (human and mouse).** Plasma protein binding was assayed by equilibrium dialysis method at Eurofins Panlabs, St. Charles, MO, USA. Briefly, the dialysate compartment was loaded with 0.05 M phosphate buffer and the sample side was loaded with plasma spiked with the test compound (10  $\mu$ M final concentration). The samples were incubated for 4 hours at 37°C, then they were prepared and analyzed by HPLC-MS/MS. Results were expressed as % plasma bound compound with respect to the initial concentration. The sum of the mass of the test compound in the test buffer and plasma samples compared to the mass in the plasma at the start of the assay is used to calculate percent recovery. Acebutolol, quinidine and warfarin were used as reference compounds.

**In vitro metabolic stability.** In the metabolic stability assays performed at Eurofins Panlabs, St. Charles, MO, USA, test compound at 0.1  $\mu$ M was pre-incubated with pooled liver microsomes (human, Sprague-Dawley rat or CD mouse) in phosphate buffer (pH 7.4) for 5 minutes in a 37°C shaking water bath. The reaction was initiated by adding NADPH-generating system and incubated for 0, 15, 30, 45, and 60 minutes. The reaction was stopped by transferring the incubation mixture to CH<sub>3</sub>CN/MeOH. Samples were then mixed and centrifuged. Supernatants were used for HPLC-MS/MS analysis. All assays were run with specific positive controls. Imipramine, propranolol, terfenadine and verapamil were used as reference compounds. Metabolic stability, expressed as percent of the parent compound remaining, was calculated by comparing the peak area of the compound at the time point relative to that at time-0. The half-life ( $t_{1/2}$ ) was estimated from the slope of the initial linear range of the logarithmic curve of compound remaining (%) vs. time, assuming the first-order kinetics.

**CYP inhibition.** CYP inhibition assay was performed at Eurofins Panlabs, St. Charles, MO, USA on human liver microsomes, panel of 6 assays including CYP2B6, CYP2C8, CYP2C9, CYP2C19, CYP2D6, CYP3A4. Briefly, human liver microsomes were incubated for 20-50 minutes (depending on CYP subtype) at 37°C in the presence of specific substrates, then specific metabolite formation was measured by HPLC-MS/MS method. Inhibition reference compounds were tested concurrently. Peak areas corresponding to the metabolite of each substrate were recorded. The percent of control activity was then calculated by comparing the peak area obtained in the presence of the test compound to that obtained in the absence of the test compound. Subsequently, the percent of inhibition was calculated by subtracting the percent control activity from 100 for each compound.

## PK STUDY

**Animal treatment.** Ten male CD1-CR mice (Charles River, Calco, Italy), 18 - 25 g, were used. The animal house was maintained under artificial lighting (12 hours) between 7:00 and 19:00 in a controlled ambient temperature of 21  $\pm$  3°C, and relative humidity between 20-80%. All animals had free access to food and water.

Compound **14** was administered intraperitoneal (i.p.) route at 10 mg/kg dose. The collection was performed at 0.5, 1, 2, 4, and 7 hours post administration. Compound was prepared in 10 % polyethylene glycol (PEG) 400 and 10% Tween 80 in physiological saline. At each time point, blood and brain samples from two mice were collected.

Animals were placed under isoflurane anaesthesia and approximately 400  $\mu$ L of blood were collected by cardiac puncture using a sterile disposable syringe for terminal blood sampling. The blood samples were immediately transferred into tubes containing anticoagulant agent (K3 EDTA) for plasma preparation. After sealing each tube, the blood samples were gently agitated and stored on ice until centrifugation (within 30 minutes of sampling). The samples were centrifuged at +4°C, at 2000 g, for 10 minutes. The entire resultant plasma was immediately transferred into 2 tubes (2 aliquots of approximately 100  $\mu$ L). The tubes were stored at approximately -80°C until analysis.

Immediately after blood collection, animals were euthanized through cervical dislocation. Their brain was quickly removed from the skull, rinsed in physiological saline and placed in pre-labelled tubes and frozen in liquid nitrogen until the storage at -80°C.

The study was conducted in compliance with Animal Health regulations for the ethical treatment of animals. In particular with the Council Directive No. 2010/63/UE on the protection of animals used for scientific purposes and in accordance with the recommendations of the Association for Assessment and Accreditation of Laboratory Animal Care (AAALAC). The study was authorized by Prefet de la Mayenne (France). The investigation of the pharmacokinetic properties of compound **14** was performed by a hybrid approach (snapshot/rapid design) considering the objective of having a robust PK evaluation reducing the number of sacrificed animals.<sup>11</sup>

**Bioanalysis.** Compound **14** in mouse plasma and brain samples was determined by LC-MS/MS method in the following quantification range 0.488 - 1000 ng/mL and 0.977 - 2000 ng/g, respectively.

Plasma study samples, calibrators and Quality Controls (30  $\mu$ L) were spiked with a solution (40 ng/mL; 10  $\mu$ L) of a structurally related substance used as Internal Standard (IS), and successively deproteinized with CH<sub>3</sub>CN containing 0.1% formic acid (250  $\mu$ L). After centrifuging, the supernatant was evaporated under N<sub>2</sub> flow (SPE Dry, Biotage). The residue was dissolved in H<sub>2</sub>O/CH<sub>3</sub>CN = 90:10 (% v/v) containing 0.1% formic acid (200  $\mu$ L).

Brain study samples, calibrators and Quality Controls (100 mg) were added with 1 mL of CH<sub>3</sub>CN containing 1% v/v formic acid and then with IS solution (0.5  $\mu$ g/mL, 10  $\mu$ L). After vortexing, the sample was submitted to bead beating homogenization procedure (30 s at 6000 rpm for 3 cycles) using Precellys 24 (Bertin Instrument) and successively centrifuged. An aliquot of the clear supernatant (200  $\mu$ L) was evaporated under N<sub>2</sub> flow (SPE Dry, Biotage). The residue was dissolved in H<sub>2</sub>O/CH<sub>3</sub>CN 90:10 (% v/v) (500  $\mu$ L) containing 1% formic acid.

Analysis was performed by an LC-MS/MS method using Shimadzu Nexera LC30AD/SIL30AC coupled with QTRAP 5500 (SCIEX). Analyte and IS were separated by an Acquity UPLC® BEH C18 1.7 $\mu$ m 2.1 x 50 mm column injecting 3  $\mu$ L of the final clear solution obtained from plasma and brain samples.

Gradient elution was achieved at a flow rate of 0.8 mL/min using water containing 0.1 % formic acid and 0.1% formic acid in CH<sub>3</sub>CN as solvents of the mobile phase. Analysis was conducted by Multiple Reaction Monitoring (MRM) and positive electrospray ionization (ESI). The selected precursor and product ion transition was at  $m/z$  367.1  $\rightarrow$  252.0 for compound **14**.

**PK data analysis.** Pharmacokinetic parameters were calculated by non-compartmental analysis (NCA) of sparse plasma and brain concentrations obtained after intraperitoneal administration of 10 mg/kg of compound **14** in ten male mice. Analyses were

performed using the validated software Phoenix<sup>TM</sup> - WinNonlin<sup>®</sup> (v. 6.3). Sparse sampling computation was applied because of the few data available. With sparse data analysis, NCA first calculated the mean concentration curve for plasma or brain data at each unique time value for all the animals in the data set and then calculated the relative standard error values.

#### **AMPHETAMINE MODEL**

C57BL/6J male mice of 12 weeks old (Charles River, Calco, Italy) were housed in individual cages and allowed for two weeks to habituate in a climate-controlled animal facility ( $21 \pm 2^\circ\text{C}$ ) and maintained on a 12-hour light/dark cycle (light on: 7 a.m. - 7 p.m.) with food and water ad libitum, before beginning experimentation, as previously described.<sup>12</sup> All experiments were carried out in accordance with the guidelines established by the European Communities Council Directive (Directive 2010/63/EU of 22 September 2010) and approved by the National Council on Animal Care of the Italian Ministry of Health. All efforts were made to minimize animal suffering and to use the minimal number of animals required to produce reliable results.

#### **KINOME SELECTIVITY PANEL**

Compound **14** was assessed in a 42 kinase assay panel using the LANCE or HTRF technology<sup>12</sup> at Eurofins Cerep, Celle L'Evescault, FRANCE. Compound was firstly tested at 10  $\mu\text{M}$  in duplicate. The results were expressed as a percent of inhibition of control specific activity obtained in the presence of the test compounds. For kinases on which compound showed more than 50% inhibition at this concentration, a further characterization was done, consisting in a concentration-response curve and subsequent IC<sub>50</sub> determination (Table S3). For 19 kinases, compound **14** was tested in duplicate at five concentrations in the range from 10 nM to 100  $\mu\text{M}$ .

# <sup>1</sup>H NMR AND <sup>13</sup>C NMR SPECTRA OF FINAL COMPOUNDS

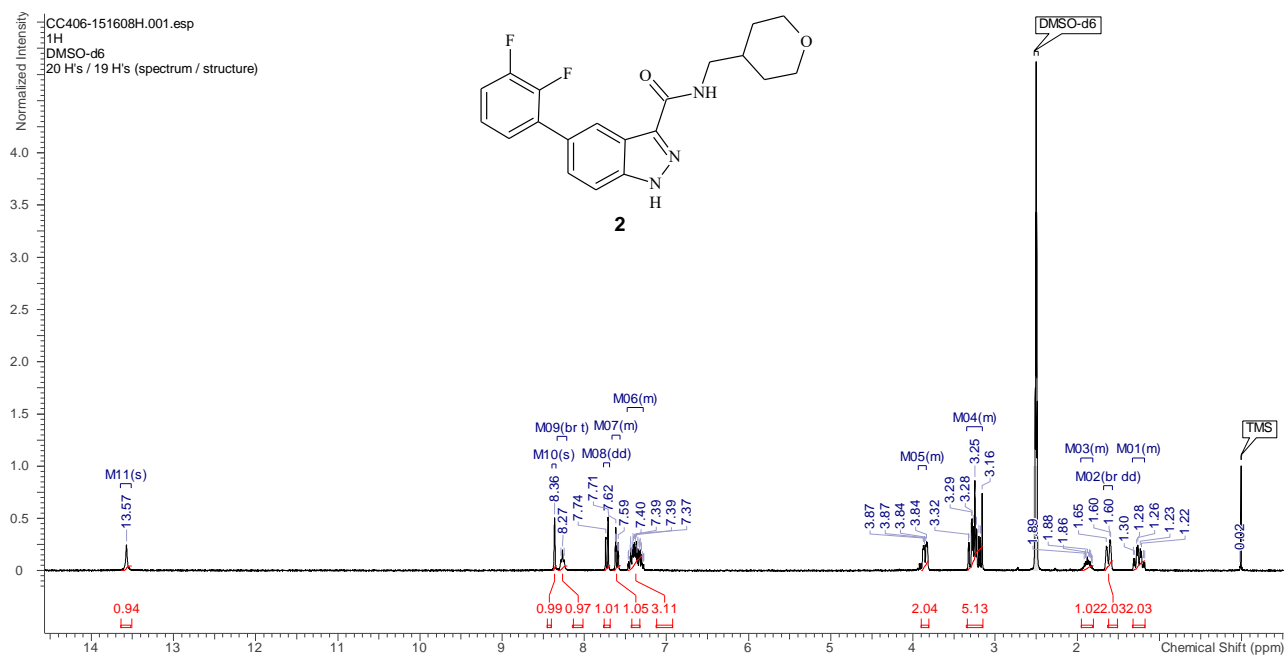

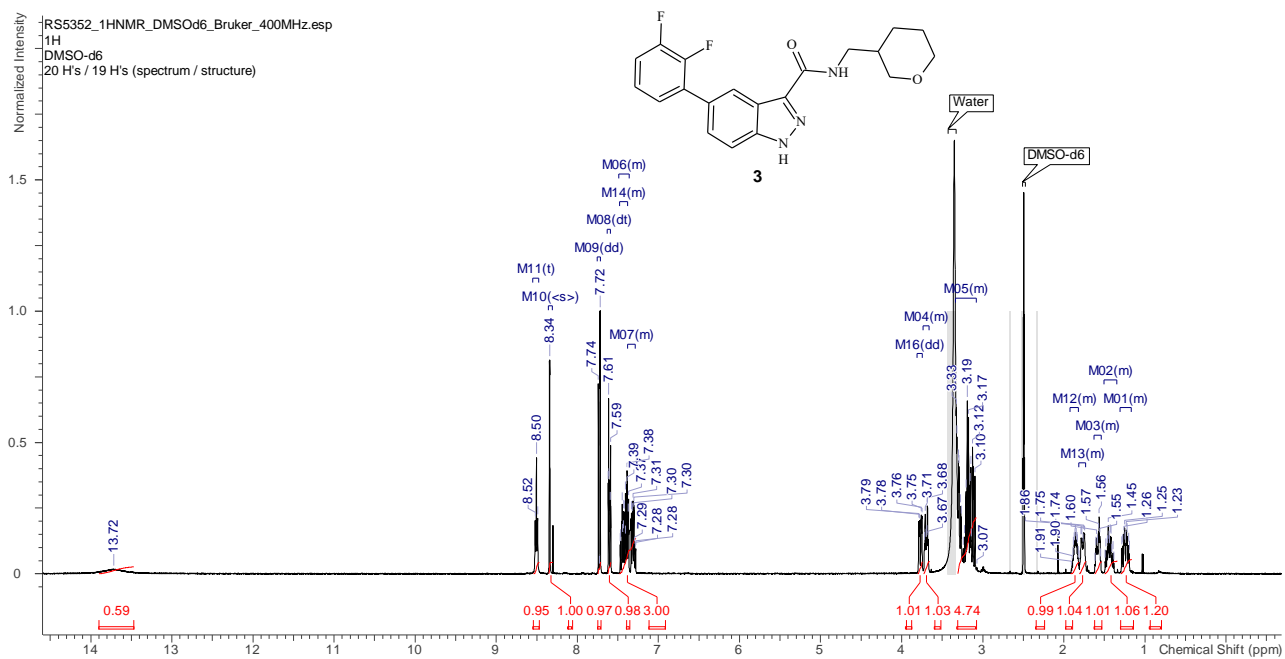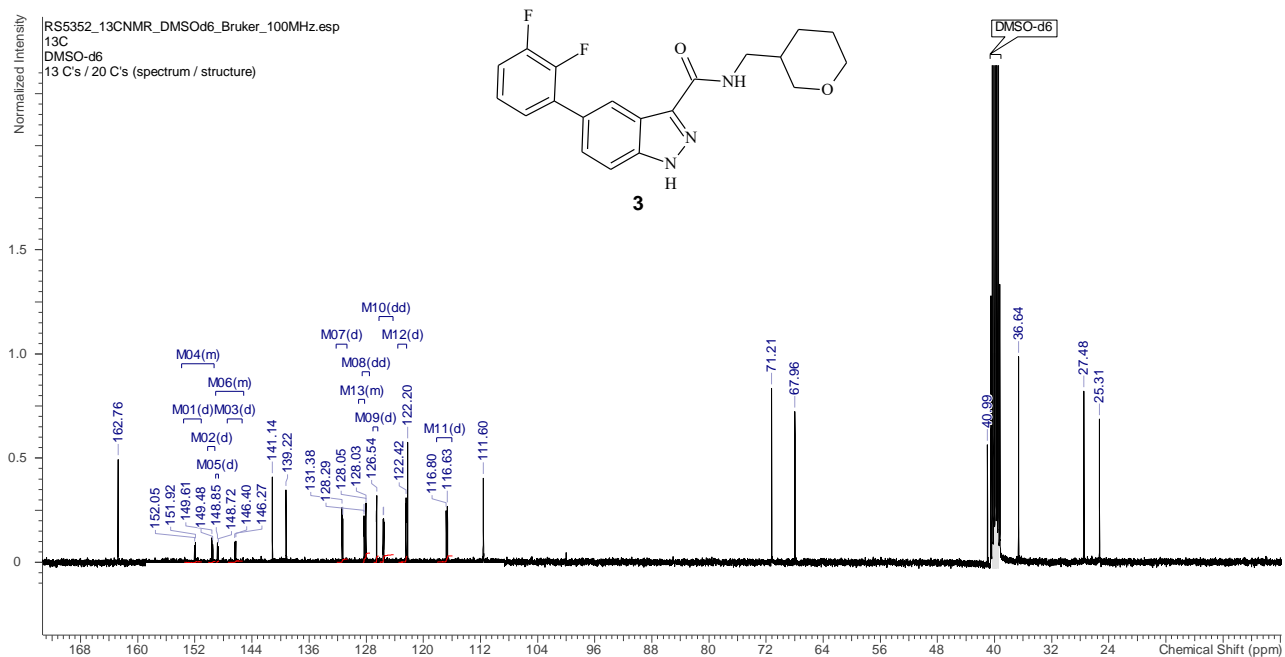



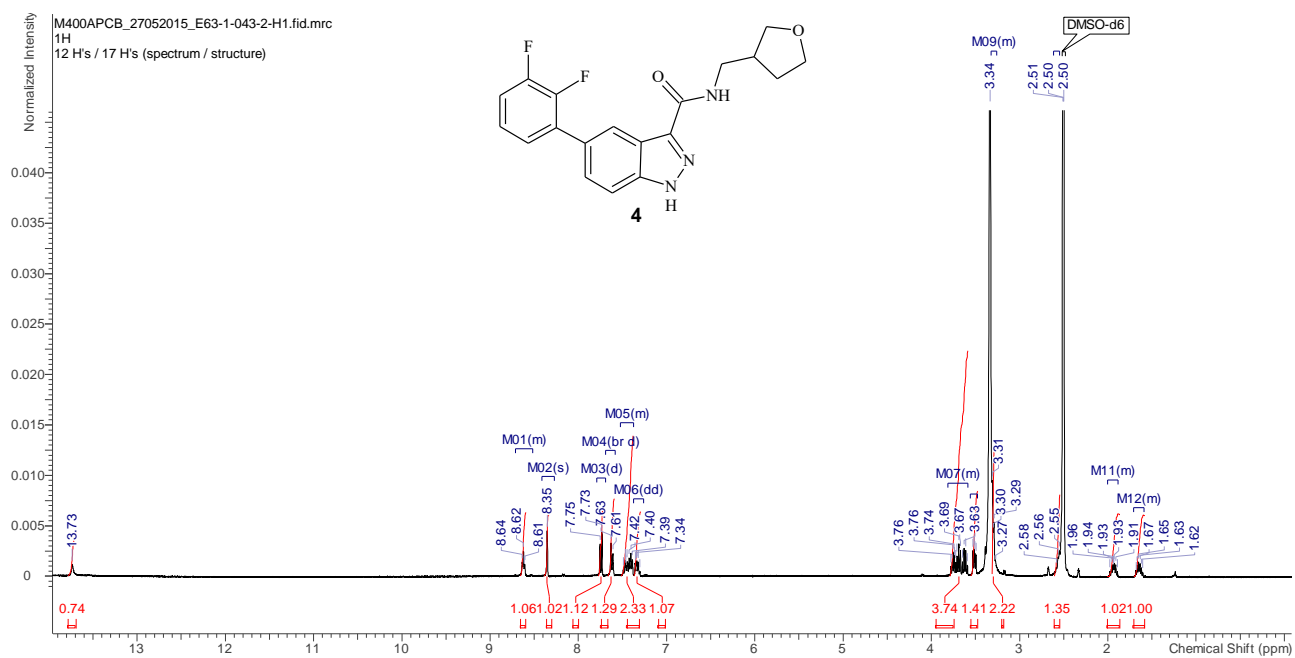

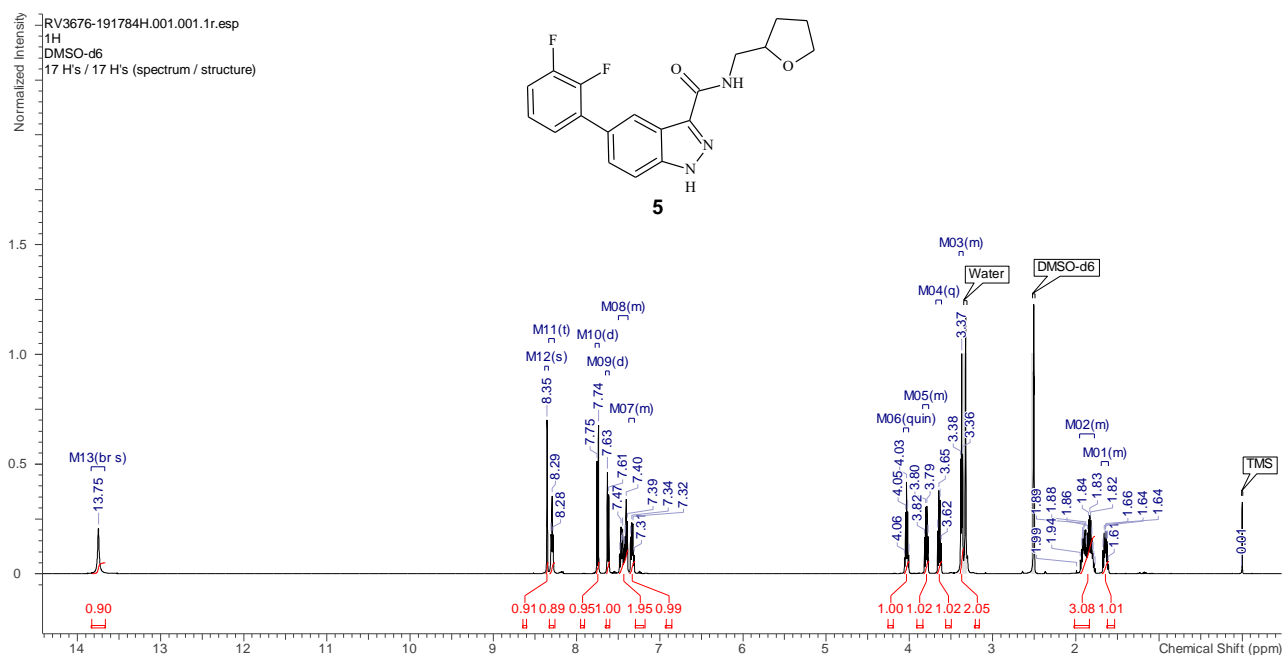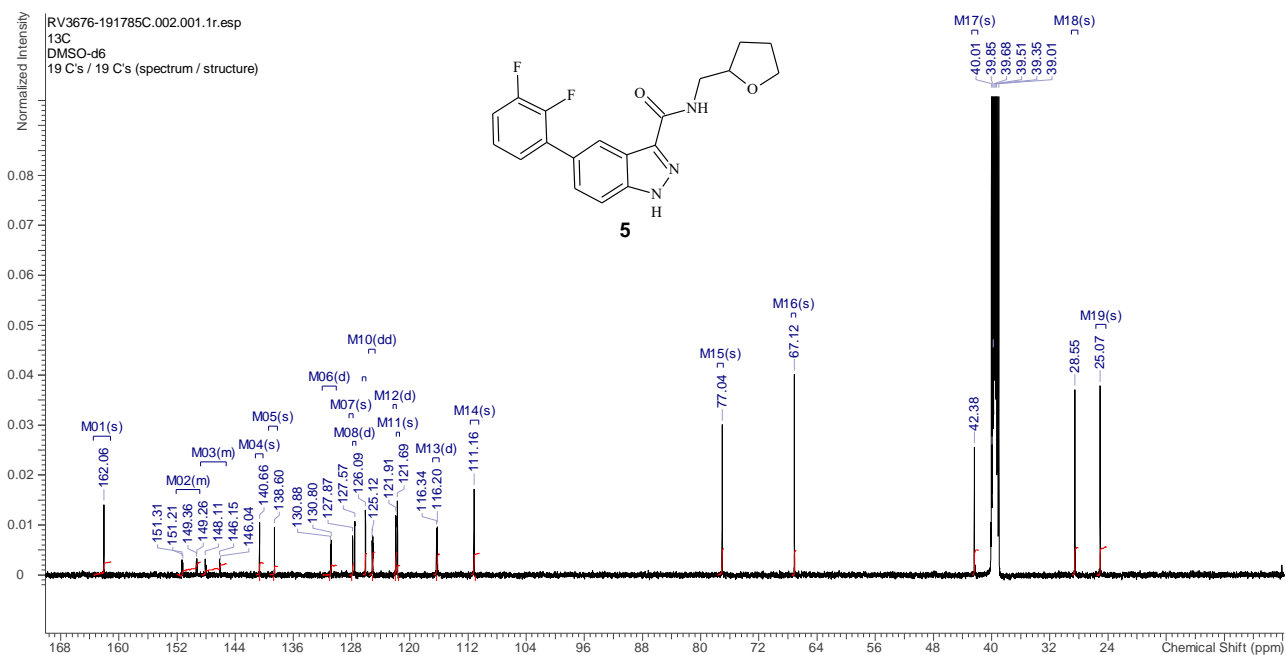

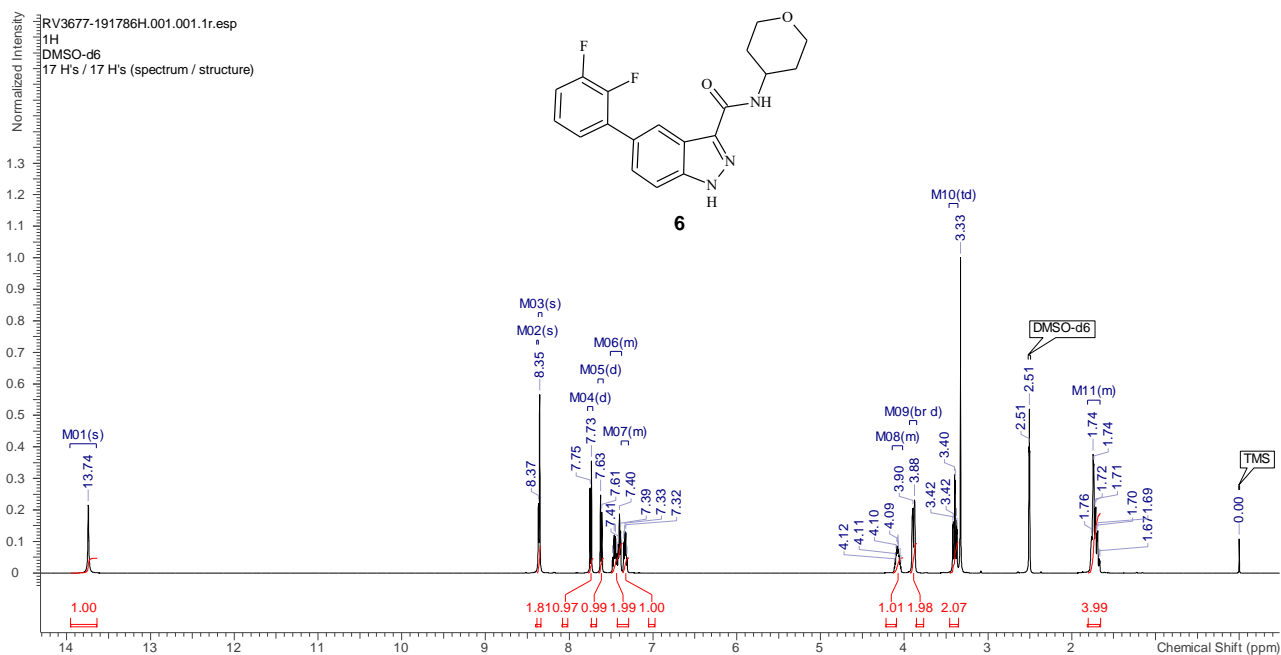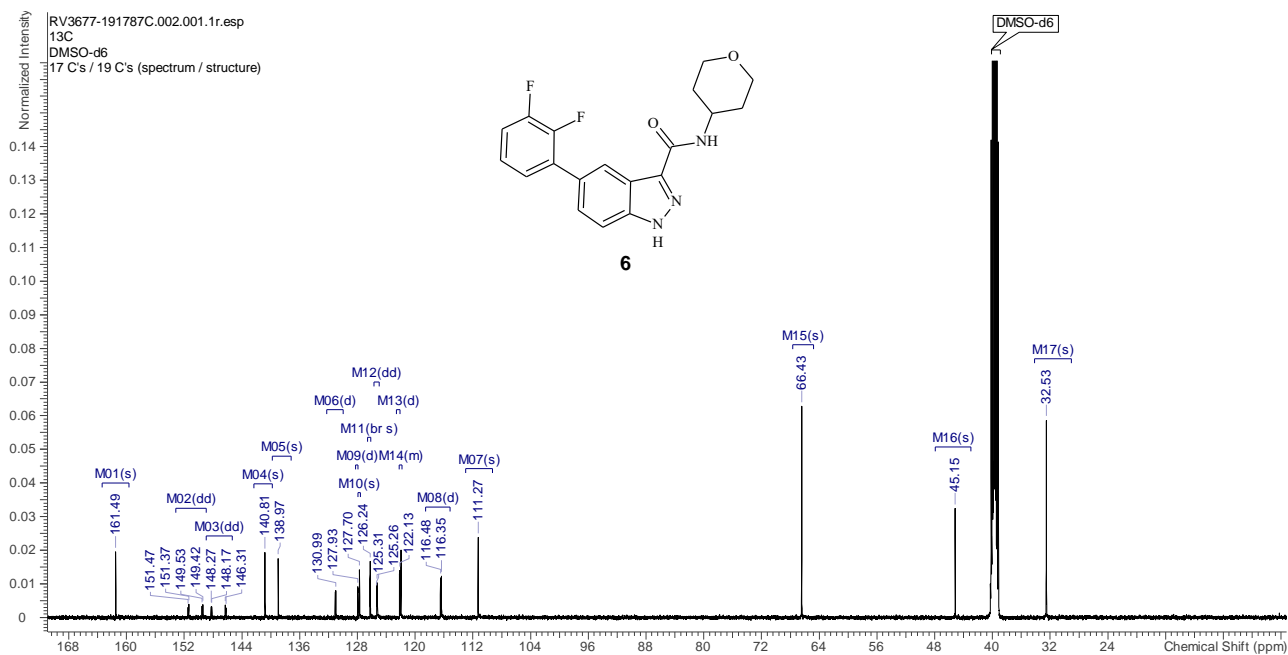

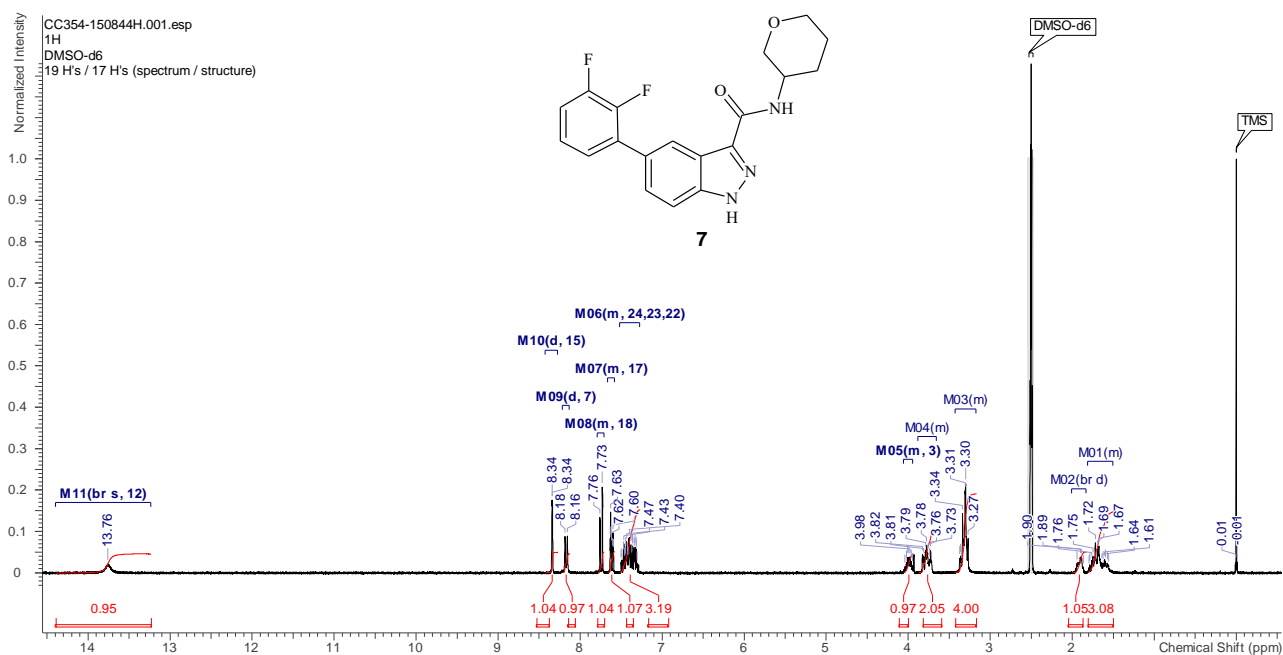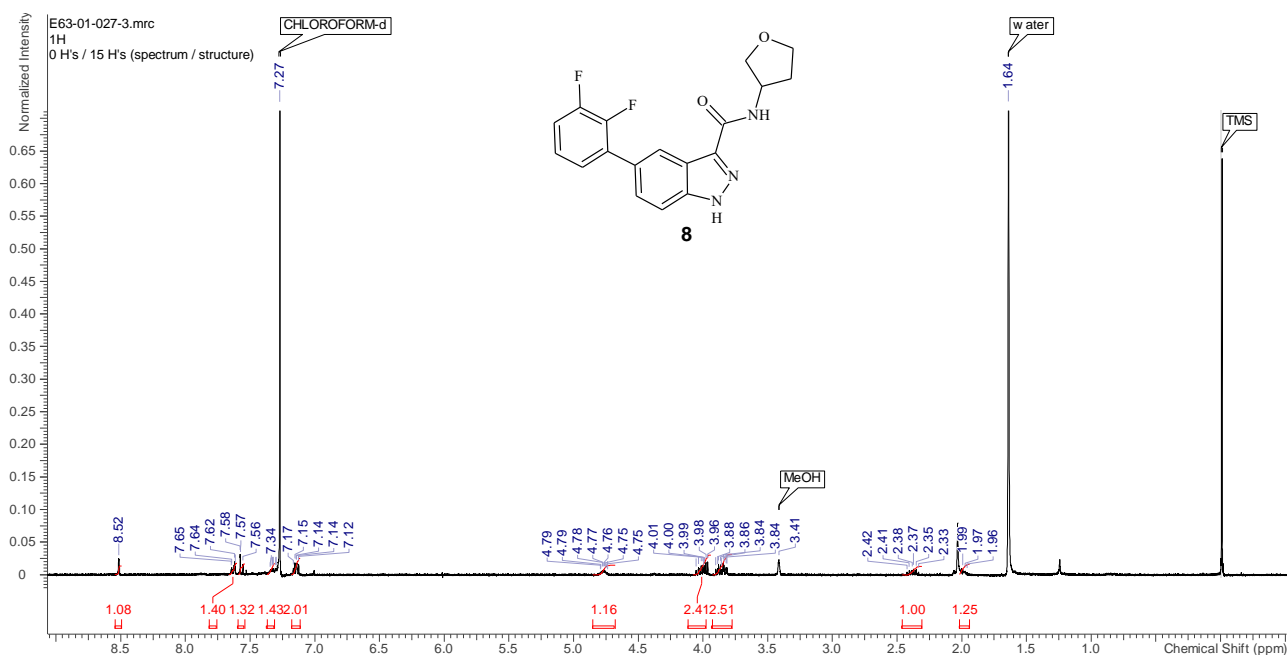

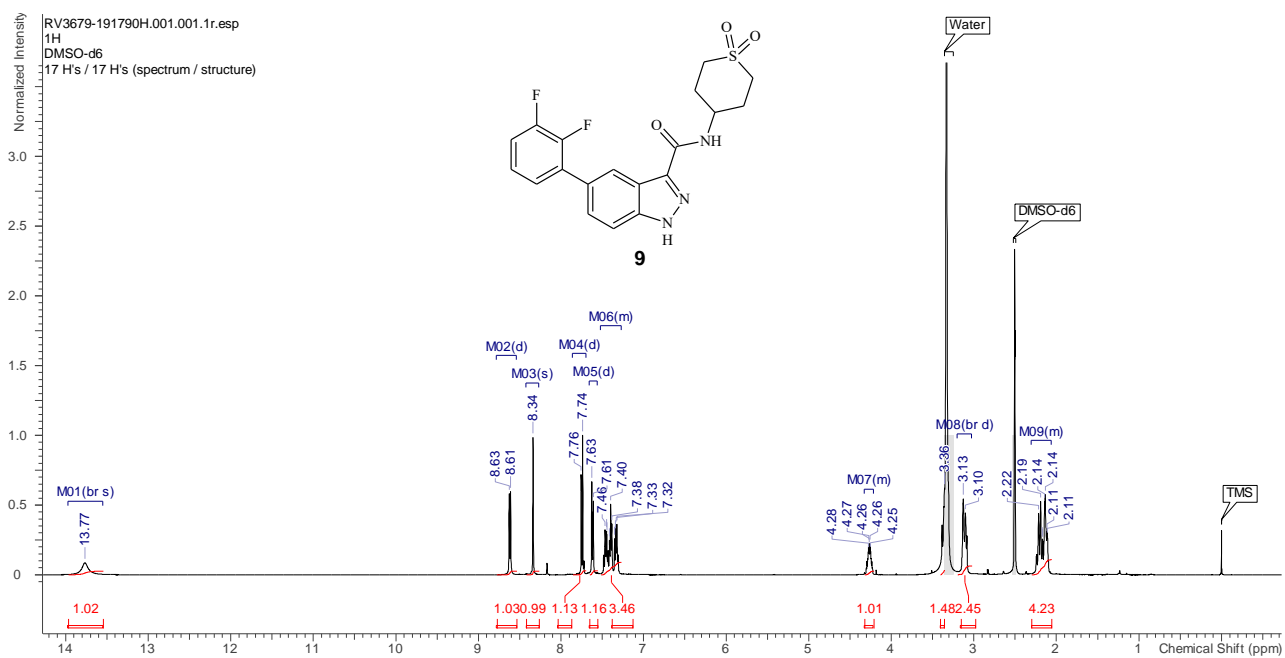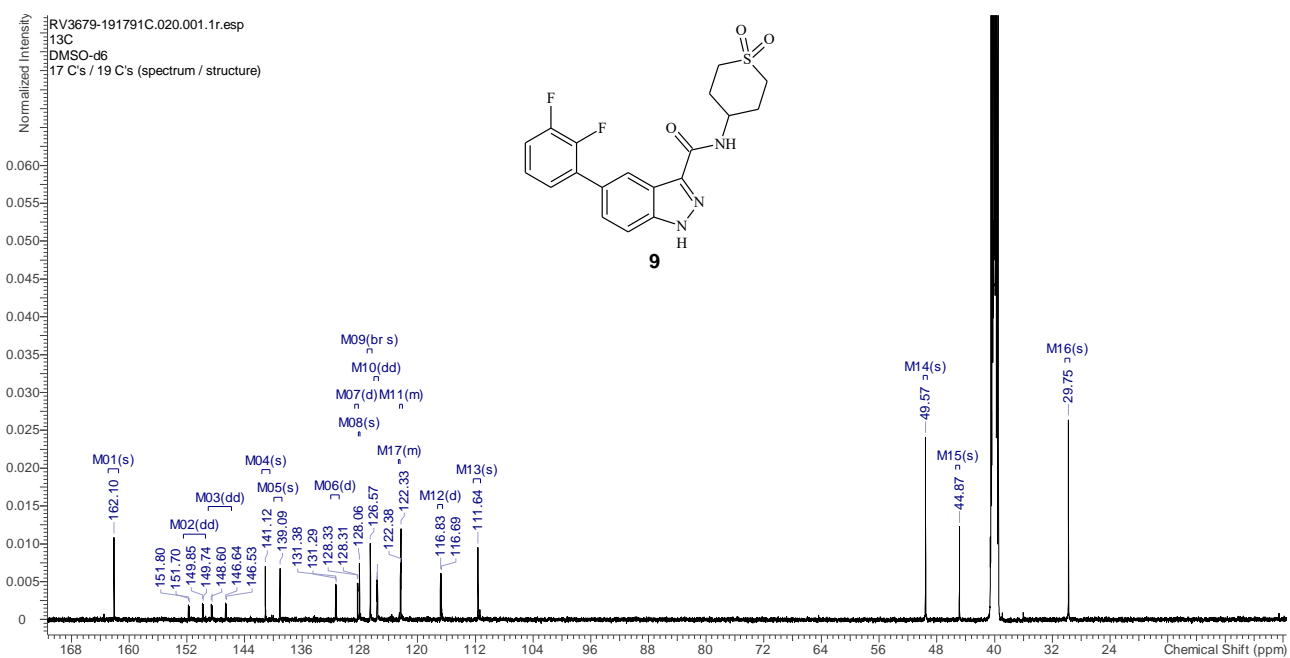

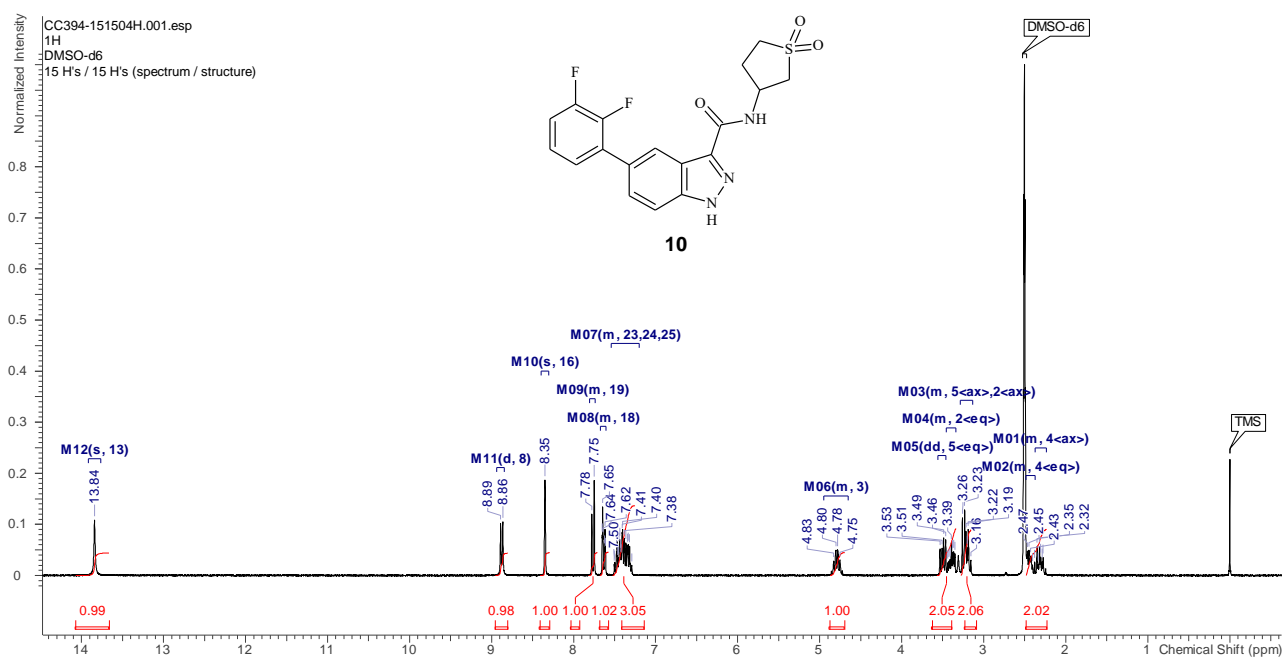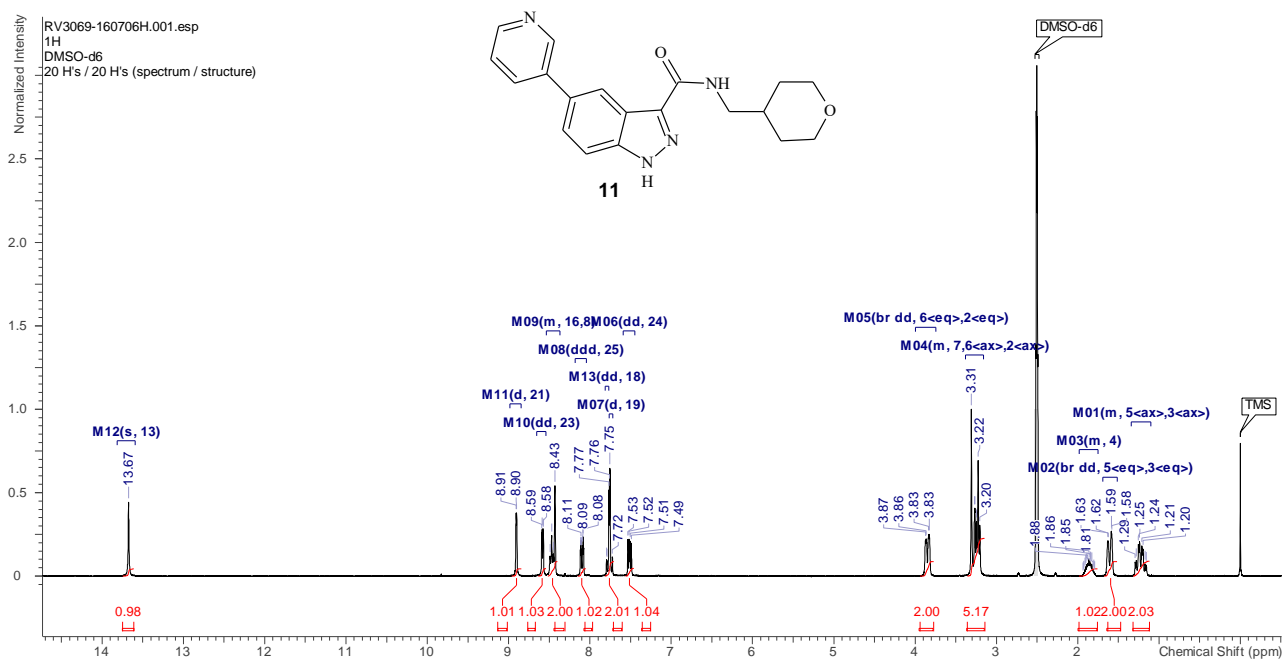

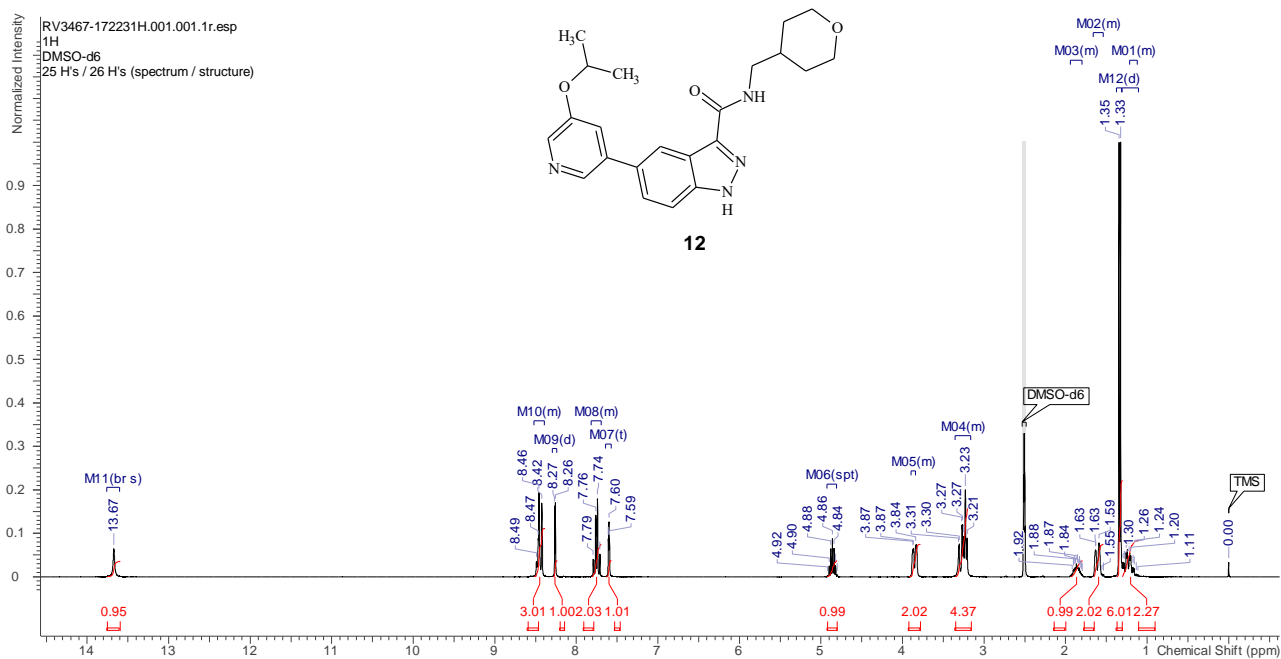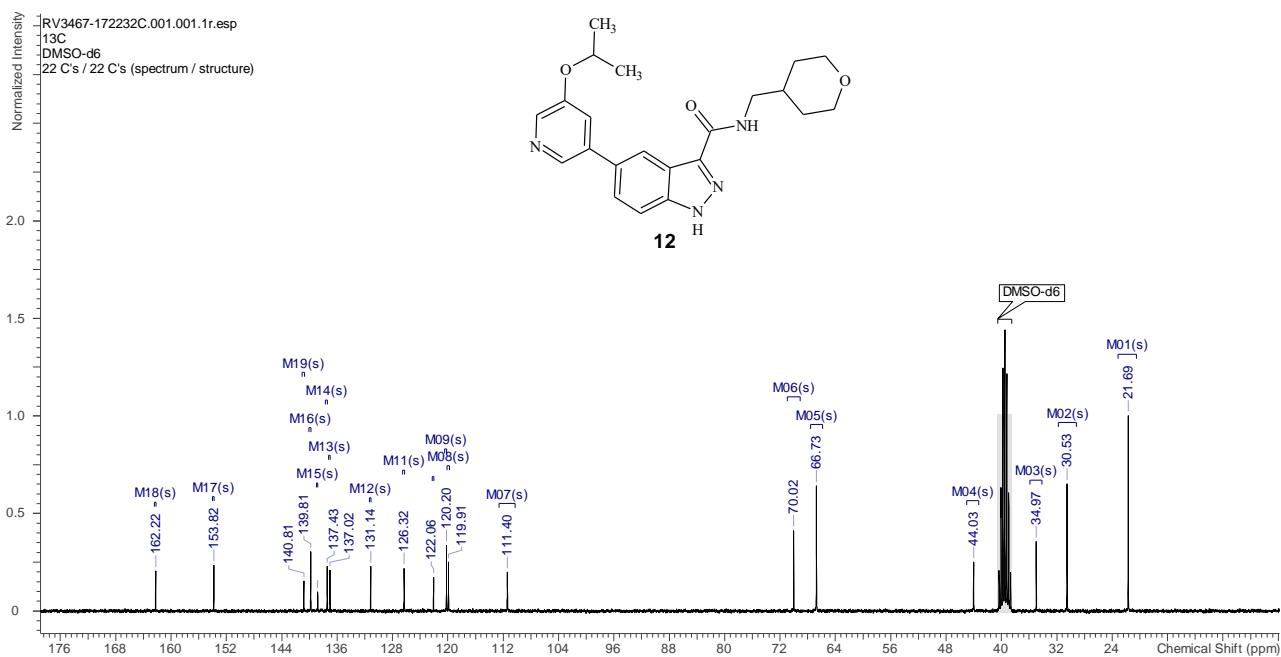

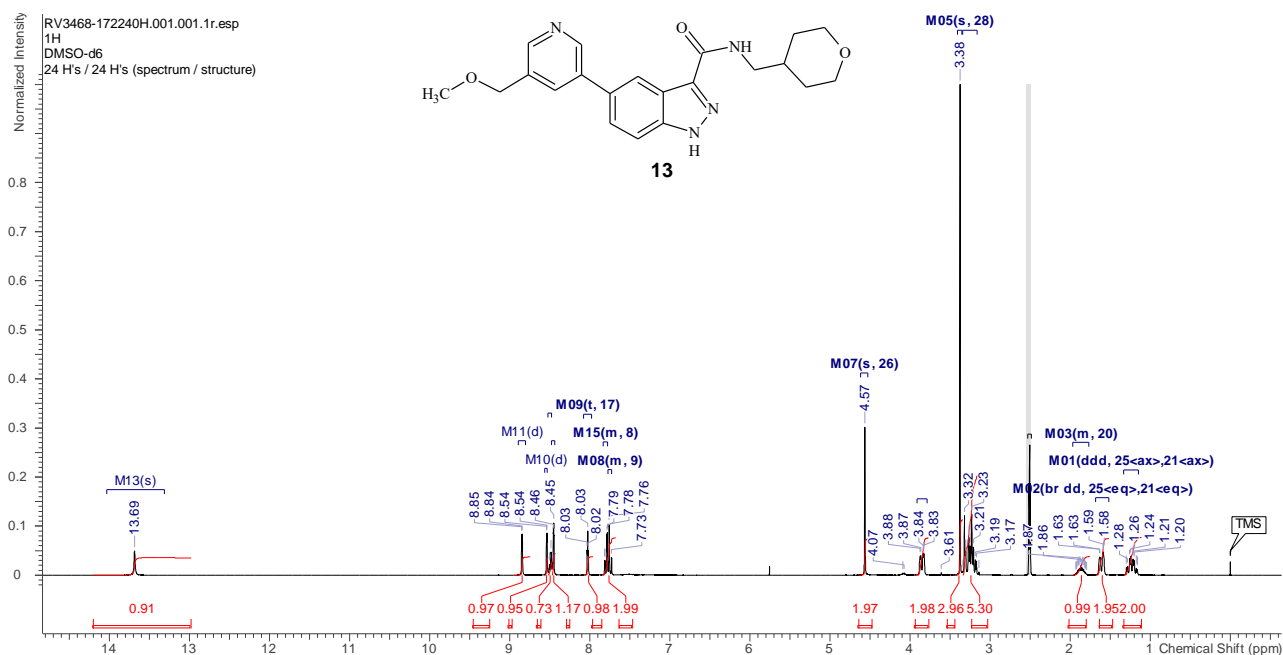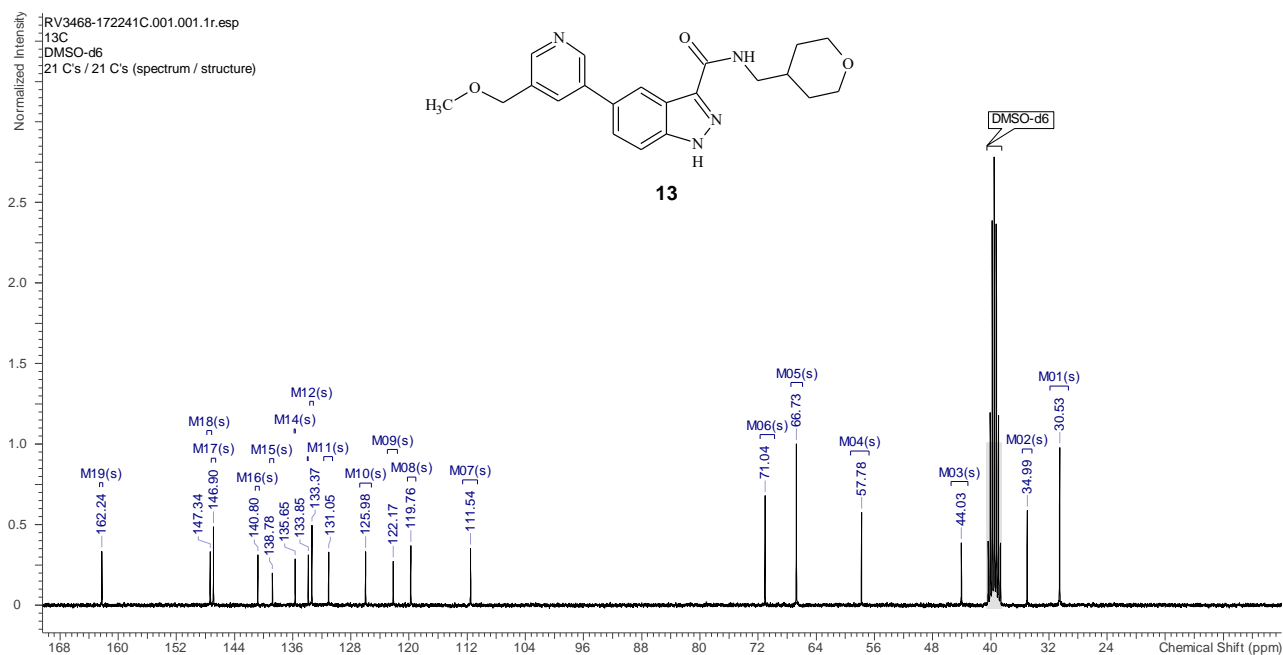



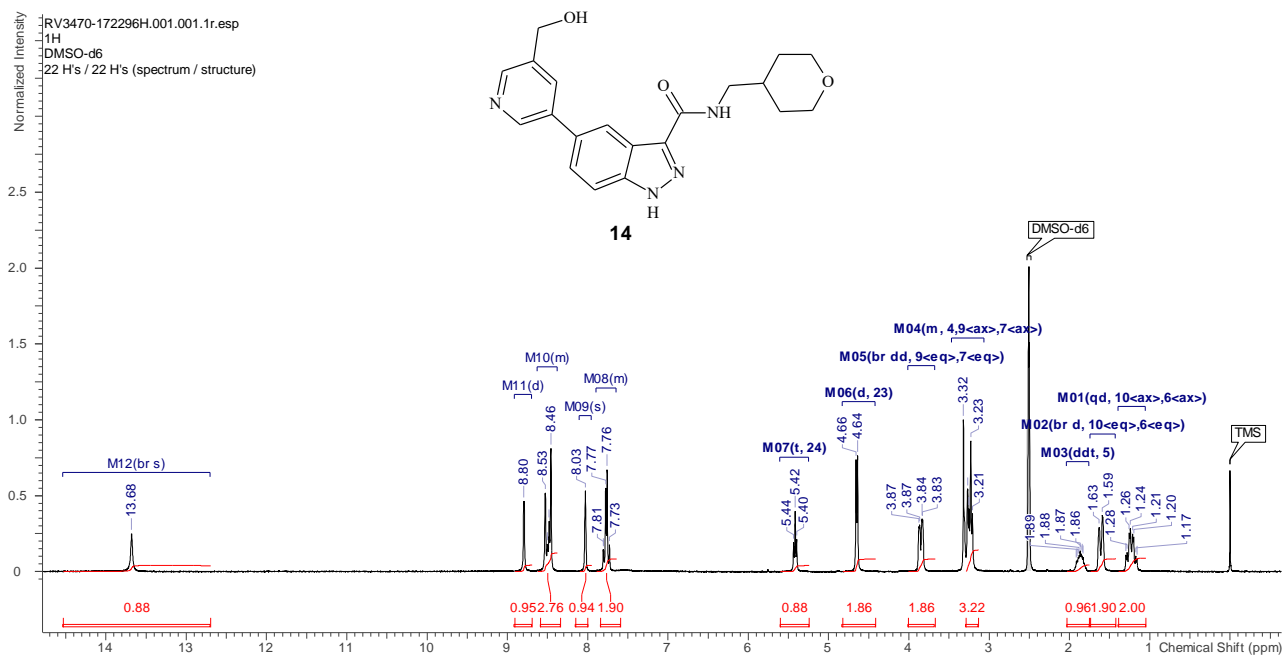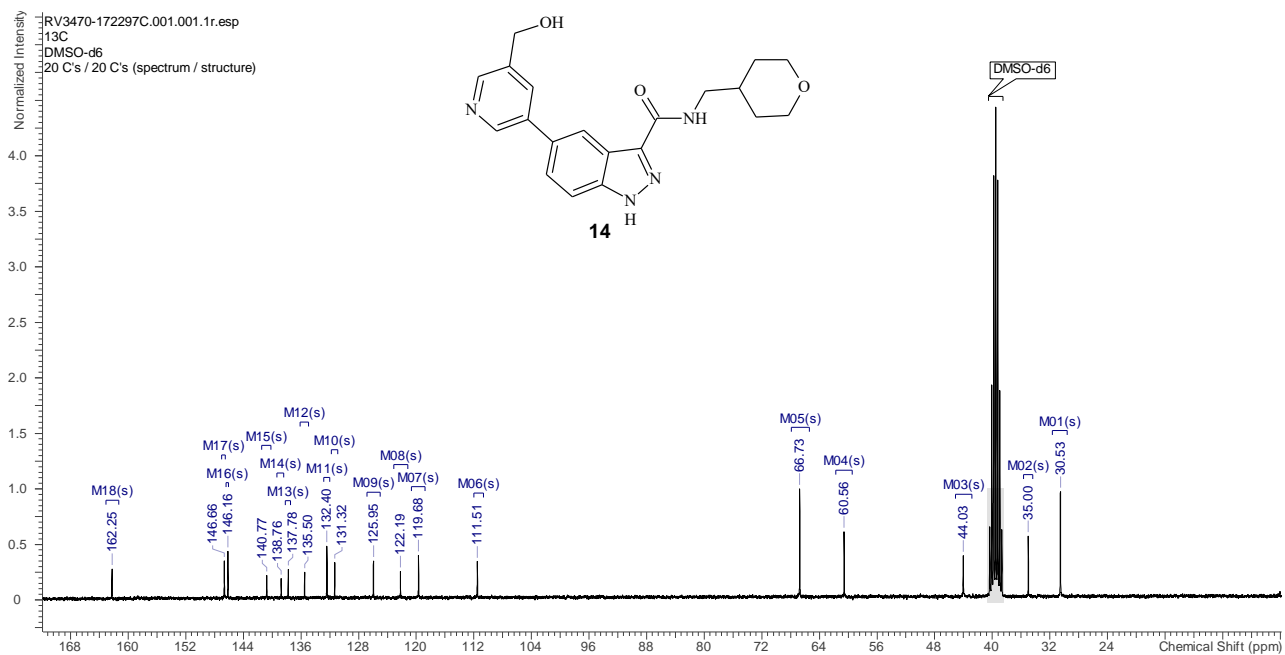

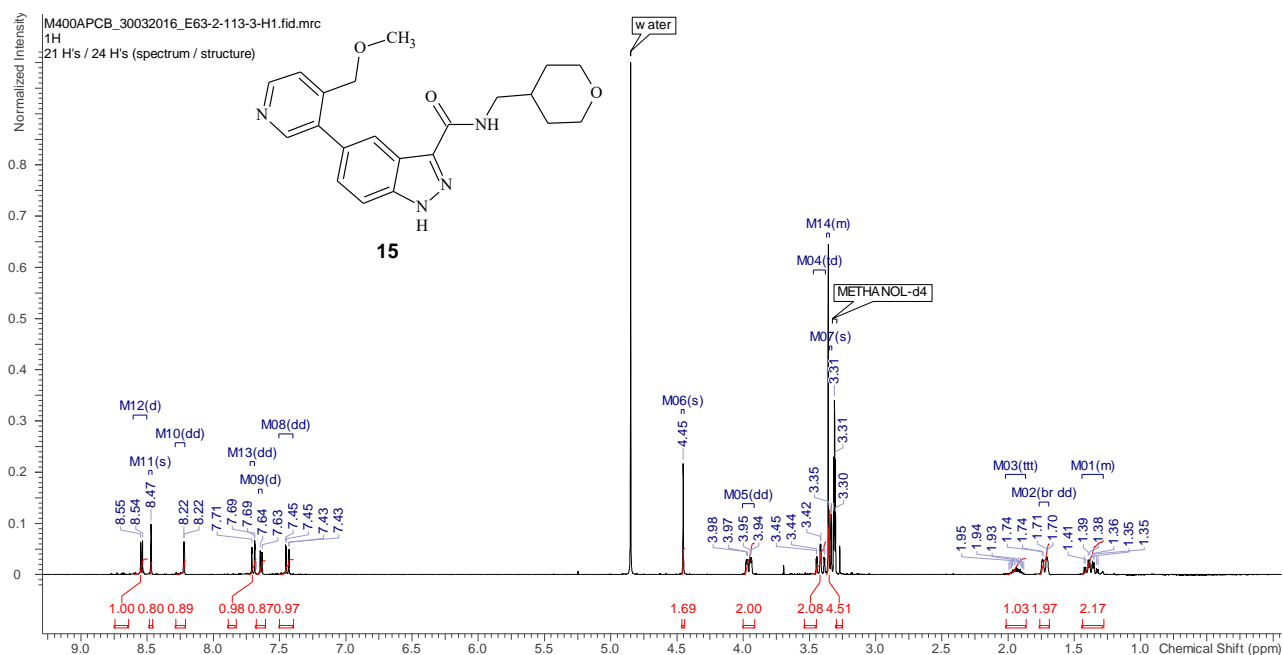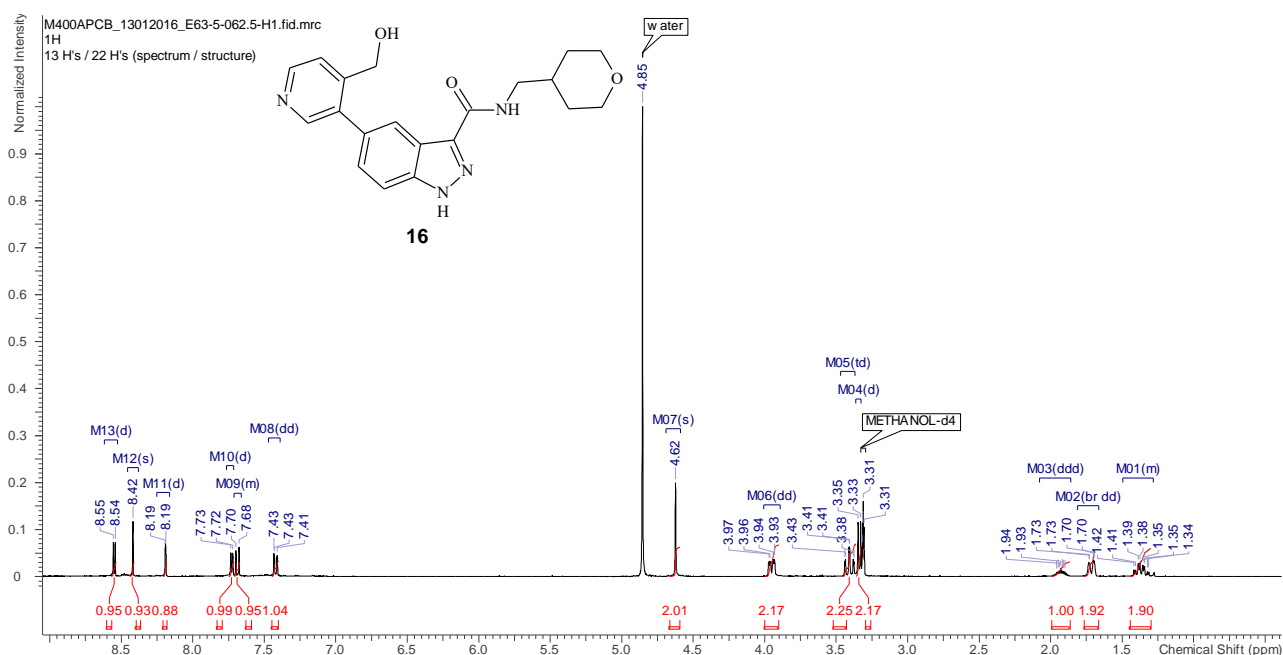

# HPLC ANALYSIS OF FINALCOMPOUNDS

Injection Volume 5 uL

Detector UV (237 nm)

Mobile Phase A ACN+0.01%TFA

Mobile Phase B water+0.01%TFA

Gradient 80-35B (30 min)

Temperature 25°C

Column Name Xbridge C19

Length 15 cm

Diameter 0.46 cm

Particle Size 5 um

Column Flow Rate 2 ml/min

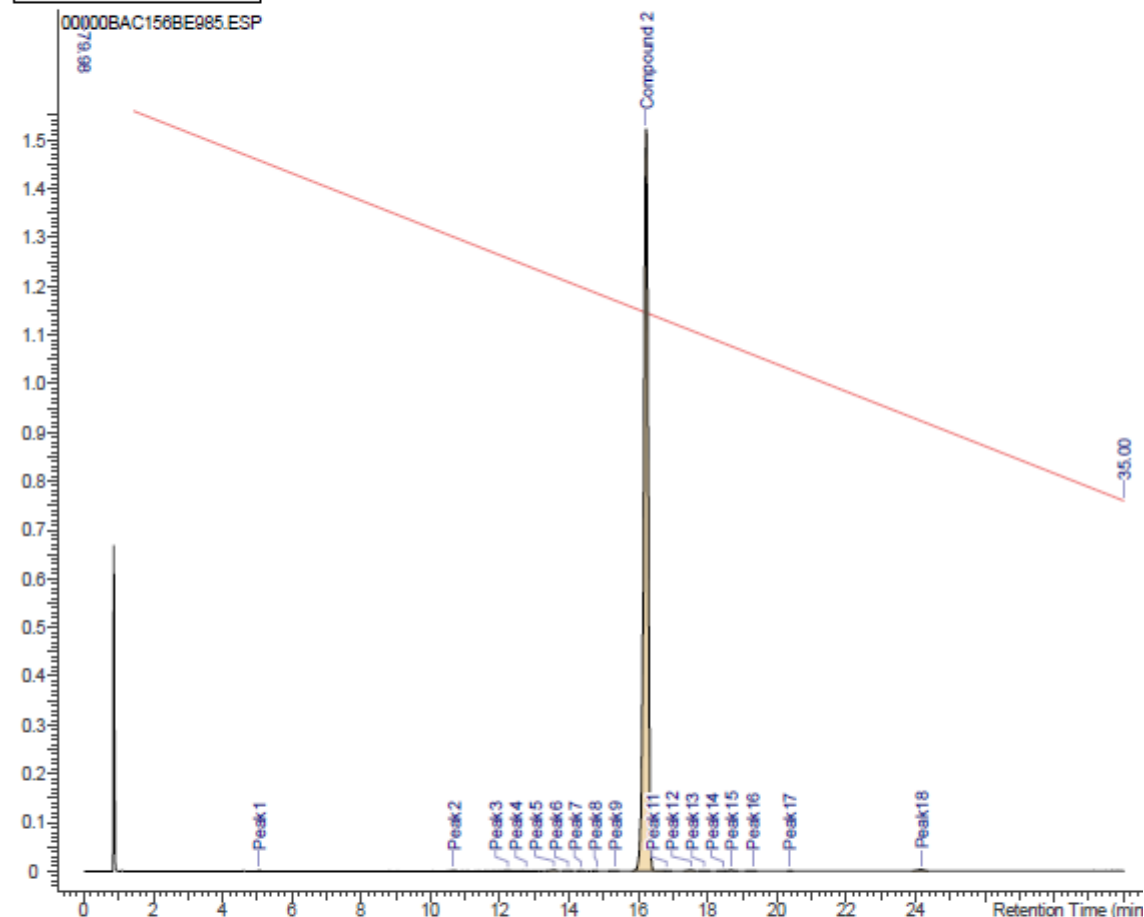

| No. | Name       | tR    | Peak Area<br>(Y units*ms) | Area Percent | Width | Height         |
|-----|------------|-------|---------------------------|--------------|-------|----------------|
| 1   | Peak1      | 5.05  | 3.085                     | 0.023        | 0.208 | 490323.031     |
| 2   | Peak2      | 10.67 | 4.425                     | 0.033        | 0.225 | 625034.625     |
| 3   | Peak3      | 12.24 | 3.415                     | 0.026        | 0.208 | 393321.375     |
| 4   | Peak4      | 12.78 | 1.195                     | 0.009        | 0.167 | 239851.797     |
| 5   | Peak5      | 13.58 | 17.432                    | 0.131        | 0.333 | 2007282.000    |
| 6   | Peak6      | 13.97 | 5.389                     | 0.040        | 0.275 | 611553.875     |
| 7   | Peak7      | 14.34 | 1.320                     | 0.010        | 0.167 | 225614.281     |
| 8   | Peak8      | 14.81 | 1.172                     | 0.009        | 0.150 | 143490.953     |
| 9   | Peak9      | 15.30 | 7.430                     | 0.056        | 0.283 | 786967.625     |
| 10  | Compound 2 | 16.22 | 13219.035                 | 99.194       | 0.917 | 1521110528.000 |
| 11  | Peak11     | 16.82 | 1.232                     | 0.009        | 0.208 | 253796.984     |
| 12  | Peak12     | 17.51 | 14.724                    | 0.110        | 0.342 | 1477789.500    |
| 13  | Peak13     | 17.89 | 2.966                     | 0.022        | 0.317 | 291230.989     |
| 14  | Peak14     | 18.45 | 2.361                     | 0.018        | 0.225 | 236173.391     |
| 15  | Peak15     | 18.68 | 11.634                    | 0.087        | 0.375 | 1125883.250    |
| 16  | Peak16     | 19.30 | 4.213                     | 0.032        | 0.308 | 471650.625     |
| 17  | Peak17     | 20.35 | 1.075                     | 0.008        | 0.142 | 127037.344     |
| 18  | Peak18     | 24.16 | 24.370                    | 0.183        | 0.442 | 2183629.000    |

Sampling Rate 120.002

Injection Volume 5 uL

Detector UV (237 nm)

Mobile Phase A ACN + 0.01% TFA

Mobile Phase B water + 0.01% TFA

Gradient 75-30B (30 min)

Temperature 25°C

Column Name Xbridge C18

Length 15 cm

Diameter 0.46 cm

Particle Size 5 um

Column Flow Rate 2 ml/min

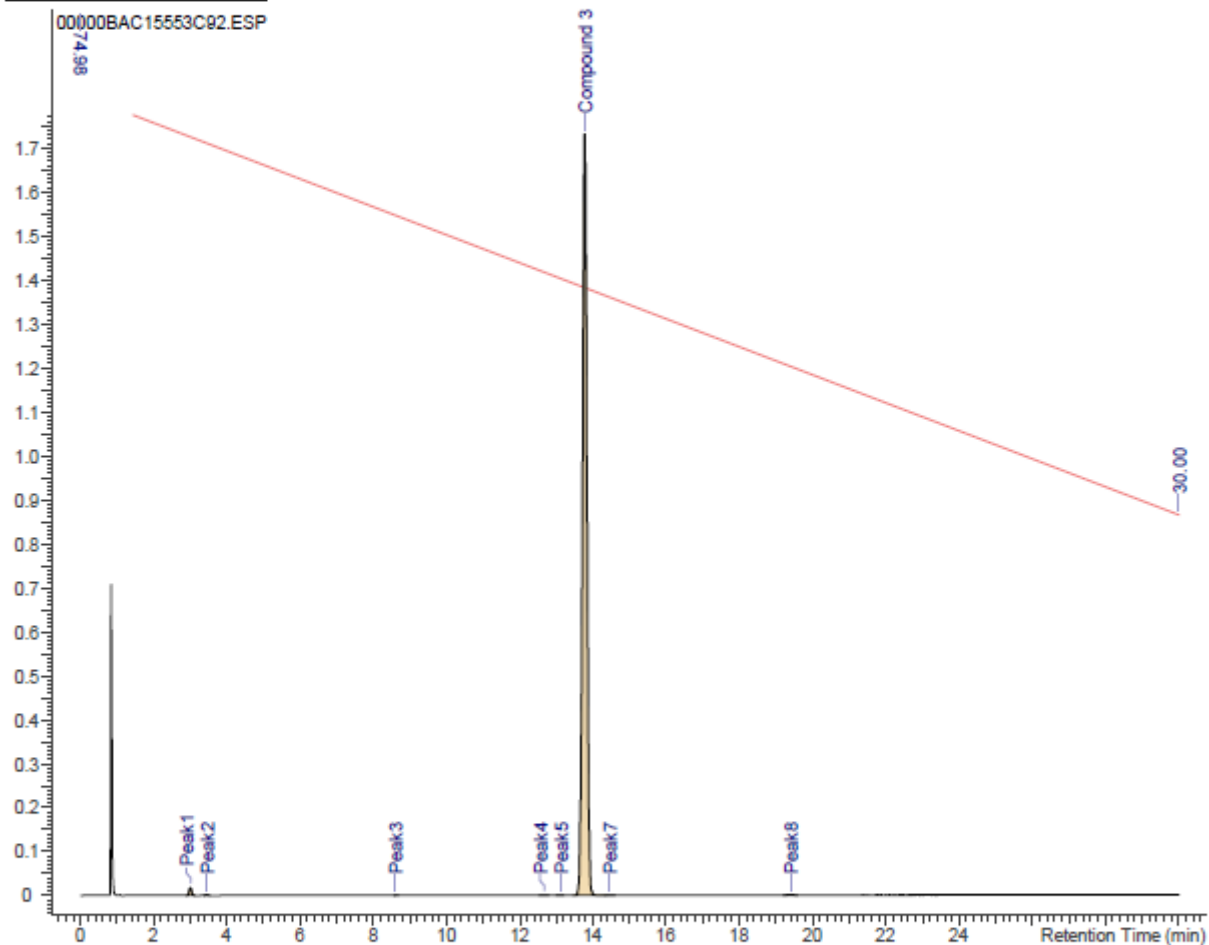

| No. | Name       | tR    | Peak Area<br>(Y units*ms) | Area Percent | Width | Height         |
|-----|------------|-------|---------------------------|--------------|-------|----------------|
| 1   | Peak1      | 3.00  | 83.163                    | 0.594        | 0.233 | 17478178.000   |
| 2   | Peak2      | 3.45  | 6.834                     | 0.049        | 0.158 | 1593834.625    |
| 3   | Peak3      | 8.59  | 0.766                     | 0.005        | 0.117 | 215923.234     |
| 4   | Peak4      | 12.67 | 4.526                     | 0.032        | 0.258 | 473215.500     |
| 5   | Peak5      | 13.12 | 2.512                     | 0.018        | 0.200 | 422335.656     |
| 6   | Compound 3 | 13.78 | 13899.097                 | 99.198       | 0.875 | 1734281856.000 |
| 7   | Peak7      | 14.44 | 2.831                     | 0.020        | 0.258 | 298548.438     |
| 8   | Peak8      | 19.39 | 11.744                    | 0.084        | 0.383 | 1221446.625    |

|                                  |                 |
|----------------------------------|-----------------|
| Injection Volume 5 uL            |                 |
| Detector UV (237 nm)             |                 |
| Mobile Phase A ACN + 0.01% TFA   |                 |
| Mobile Phase B water + 0.01% TFA |                 |
| Gradient                         | 80-35B (30 min) |
| Temperature                      | 25°C            |
| Column Name Xbridge C18          |                 |
| Length                           | 15 cm           |
| Diameter                         | 0.46 cm         |
| Particle Size                    | 5 um            |
| Column Flow Rate                 | 2 ml/min        |

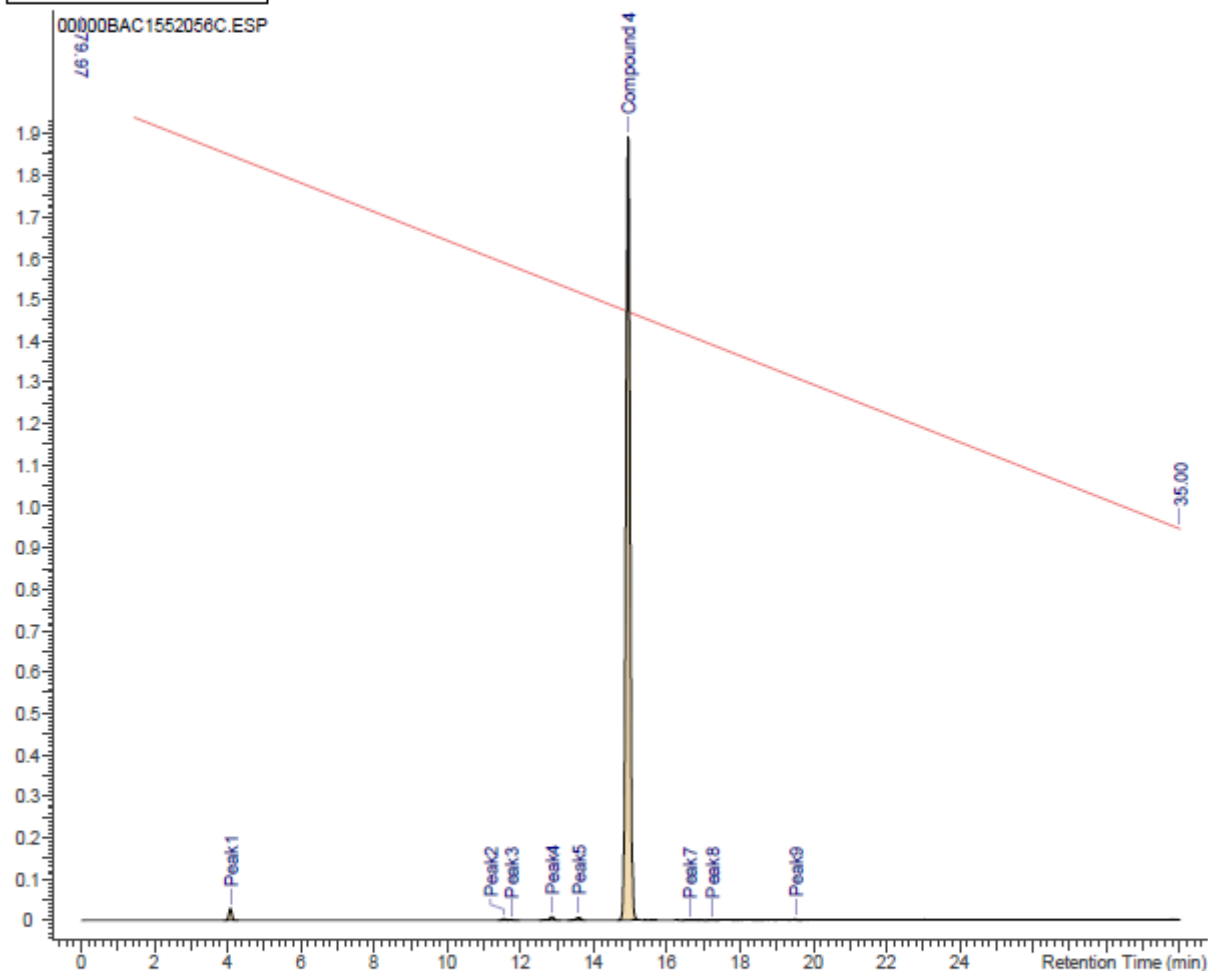

| No. | Name       | tR    | Peak Area<br>(Y units*ms) | Area Percent | Width | Height   |
|-----|------------|-------|---------------------------|--------------|-------|----------|
| 1   | Peak1      | 4.07  | 156.699                   | 1.072        | 0.142 | 28.777   |
| 2   | Peak2      | 11.54 | 19.277                    | 0.132        | 0.183 | 2.745    |
| 3   | Peak3      | 11.74 | 10.706                    | 0.073        | 0.201 | 1.445    |
| 4   | Peak4      | 12.86 | 67.137                    | 0.459        | 0.187 | 7.580    |
| 5   | Peak5      | 13.57 | 54.089                    | 0.370        | 0.200 | 6.569    |
| 6   | Compound 4 | 14.93 | 14278.296                 | 97.635       | 0.198 | 1891.492 |
| 7   | Peak7      | 16.61 | 15.581                    | 0.107        | 0.224 | 1.361    |
| 8   | Peak8      | 17.22 | 9.470                     | 0.065        | 0.217 | 1.132    |
| 9   | Peak9      | 19.51 | 12.842                    | 0.088        | 0.221 | 1.407    |

Sampling Rate 120.002

Injection Volume 5 uL

Detector UV (302 nm)

Mobile Phase A ACN + 0.01% TFA

Mobile Phase B water + 0.01% TFA

Gradient 75-30B (30 min)

Temperature 25°C

Column Name Xbridge C18

Length 15 cm

Diameter 0.46 cm

Particle Size 5 um

Column Flow Rate 2 ml/min

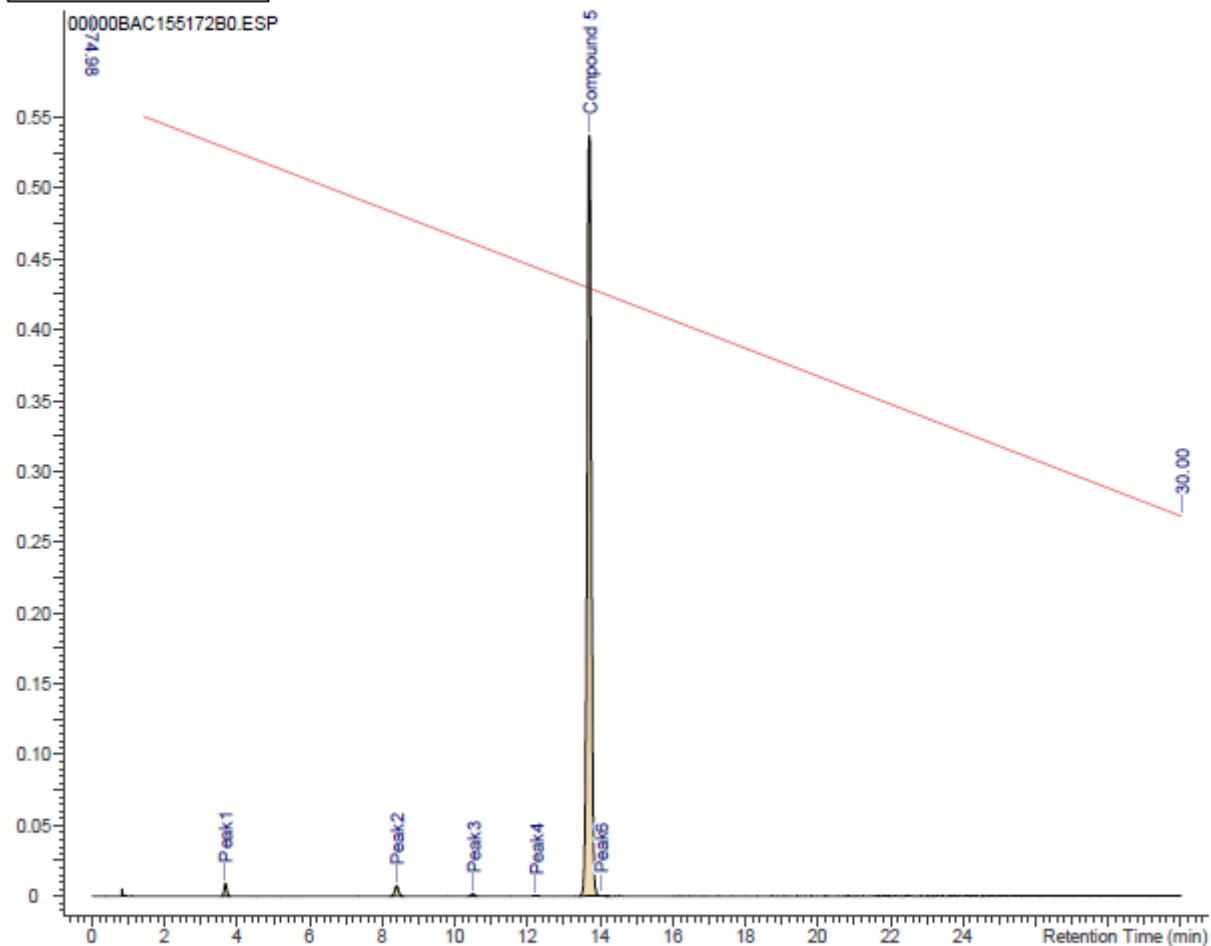

| No. | Name       | tR    | Peak Area<br>(Y units*ms) | Area Percent | Width | Height        |
|-----|------------|-------|---------------------------|--------------|-------|---------------|
| 1   | Peak1      | 3.68  | 44.219                    | 1.016        | 0.250 | 9042178.000   |
| 2   | Peak2      | 8.39  | 51.704                    | 1.188        | 0.383 | 7058270.500   |
| 3   | Peak3      | 10.49 | 10.108                    | 0.232        | 0.250 | 1410121.750   |
| 4   | Peak4      | 12.23 | 2.804                     | 0.064        | 0.183 | 374293.750    |
| 5   | Compound 5 | 13.70 | 4241.393                  | 97.437       | 0.575 | 536880448.000 |
| 6   | Peak6      | 14.01 | 2.738                     | 0.063        | 0.183 | 452684.188    |

Sampling Rate 120.0017

Injection Volume 5 uL

Detector UV (208 nm)

Mobile Phase A ACN + 0.01% TFA

Mobile Phase B water + 0.01% TFA

Gradient 80-35B (30 min)

Temperature 25°C

Column Name Xbridge C18

Length 15 cm

Diameter 0.46 cm

Particle Size 5 um

Column Flow Rate 2 ml/min

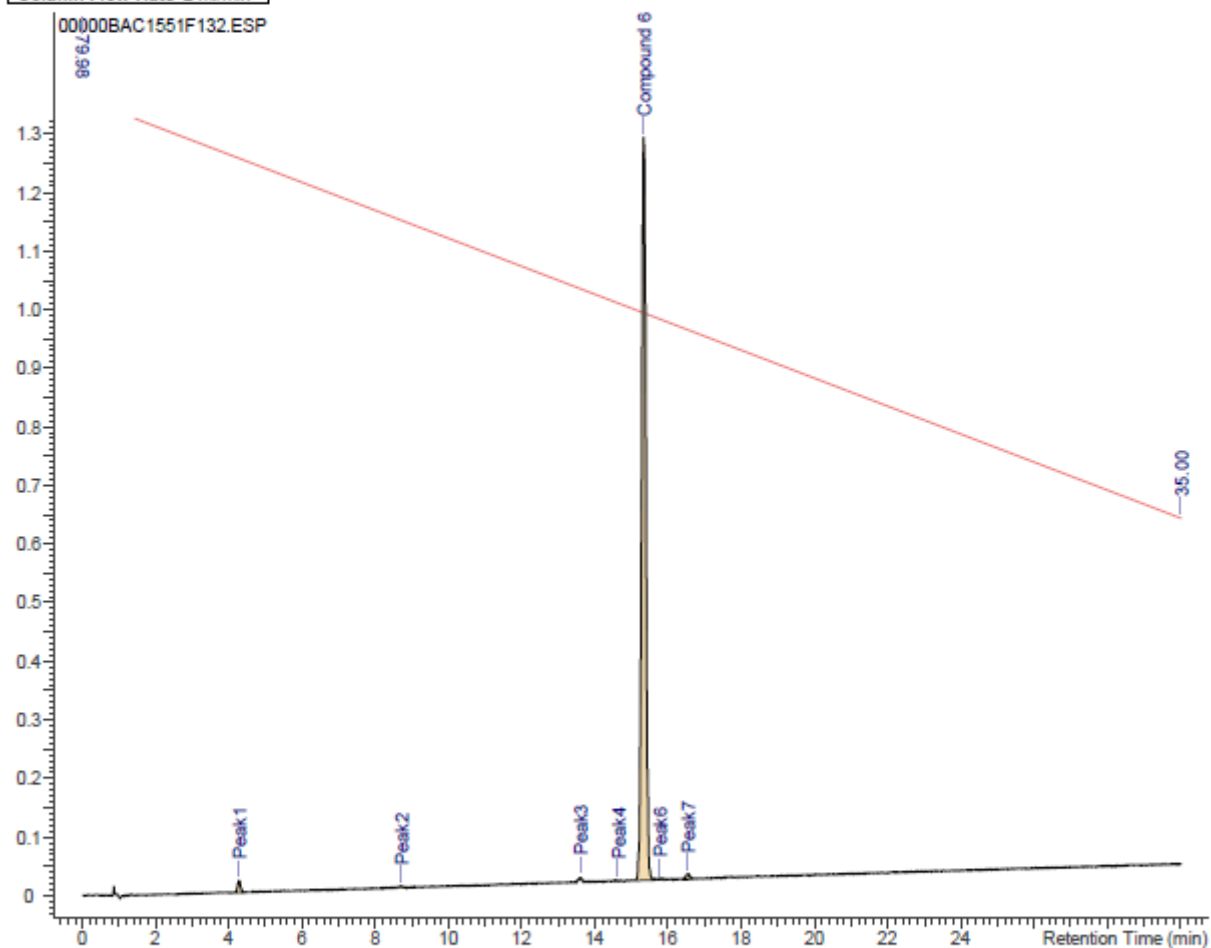

| No. | Name       | tR    | Peak Area<br>(Y units*ms) | Area Percent | Width | Height         |
|-----|------------|-------|---------------------------|--------------|-------|----------------|
| 1   | Peak1      | 4.28  | 103.507                   | 1.018        | 0.200 | 18774478.000   |
| 2   | Peak2      | 8.72  | 14.979                    | 0.147        | 0.167 | 2111837.250    |
| 3   | Peak3      | 13.60 | 49.630                    | 0.488        | 0.200 | 7510794.500    |
| 4   | Peak4      | 14.63 | 6.657                     | 0.065        | 0.117 | 1665834.500    |
| 5   | Compound 6 | 15.33 | 9905.073                  | 97.460       | 0.575 | 1257106176.000 |
| 6   | Peak6      | 15.78 | 19.432                    | 0.191        | 0.208 | 1747031.875    |
| 7   | Peak7      | 16.54 | 63.913                    | 0.629        | 0.267 | 8419971.000    |

Sampling Rate 120.002

Injection Volume 5 uL

Detector UV (206 nm)

Mobile Phase A ACN + 0.01% TFA

Mobile Phase B water + 0.01% TFA

Gradient 80-35B (30 min)

Temperature 25°C

Column Name Xbridge C18

Length 15 cm

Diameter 0.46 cm

Particle Size 5 um

Column Flow Rate 2 ml/min

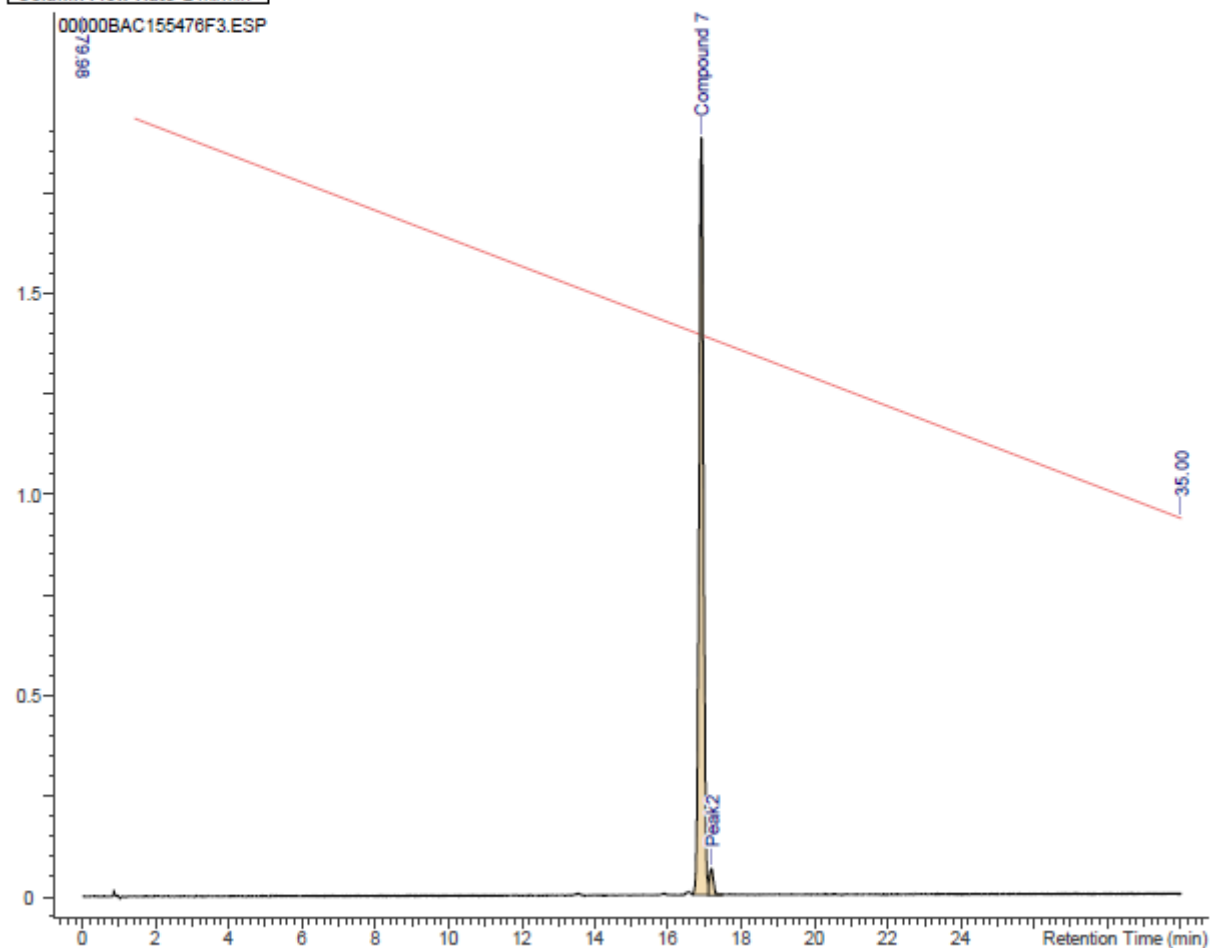

| No. | Name       | tR    | Peak Area<br>(Y units*ms) | Area Percent | Width | Height   |
|-----|------------|-------|---------------------------|--------------|-------|----------|
| 1   | Compound 7 | 16.90 | 15588.066                 | 98.842       | 0.222 | 1881.541 |
| 2   | Peak2      | 17.18 | 508.255                   | 3.158        | 0.217 | 65.299   |



|                  |                   |
|------------------|-------------------|
| Sampling Rate    | 120.0017          |
| Injection Volume | 5 uL              |
| Detector         | UV (208 nm)       |
| Mobile Phase A   | ACN + 0.01% TFA   |
| Mobile Phase B   | water + 0.01% TFA |
| Gradient         | 80-35B (30 min)   |
| Temperature      | 25°C              |
| Column Name      | Xbridge C18       |
| Length           | 15 cm             |
| Diameter         | 0.46 cm           |
| Particle Size    | 5 um              |
| Column Flow Rate | 2 ml/min          |

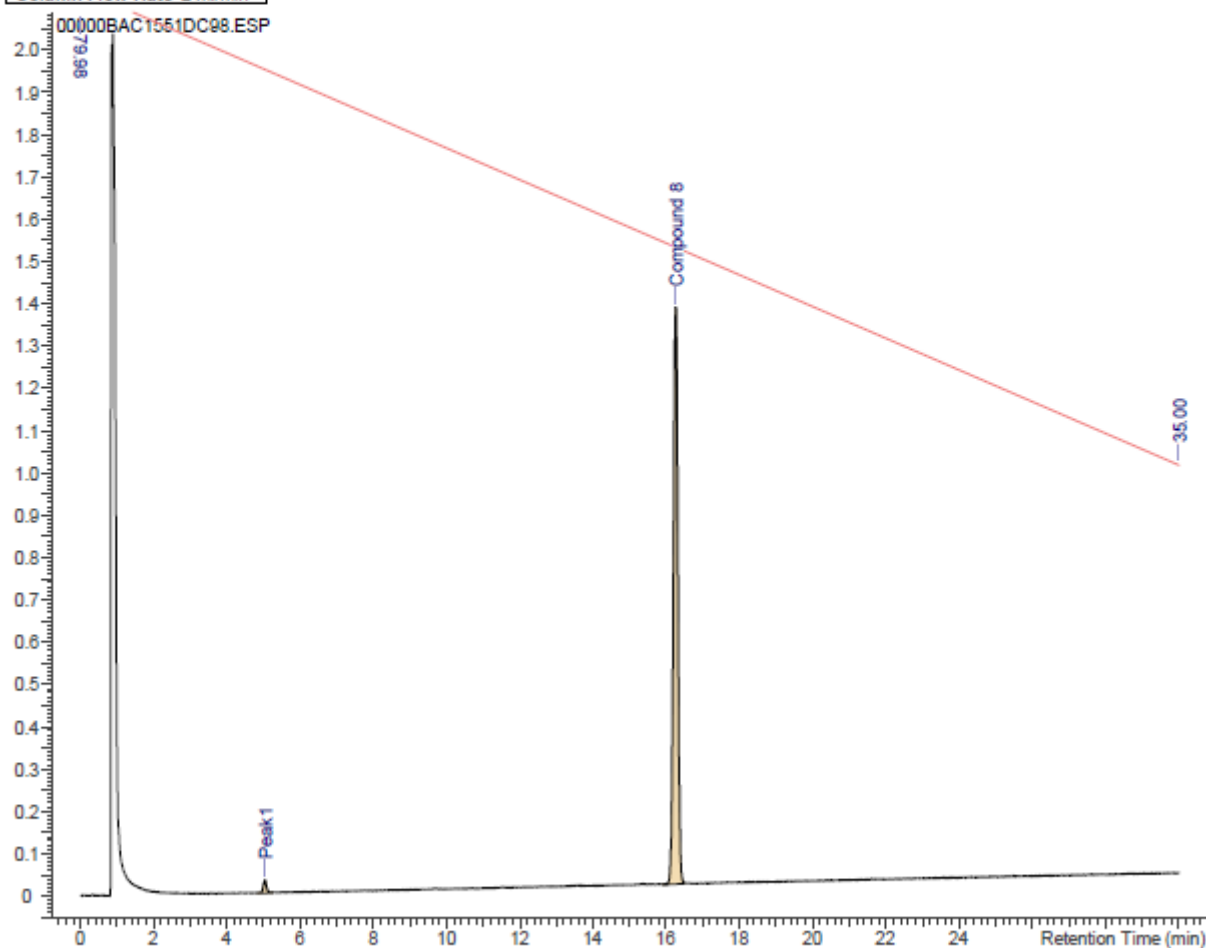

| No. | Name       | tR    | Peak Area<br>(Y units*ms) | Area Percent | Width | Height   |
|-----|------------|-------|---------------------------|--------------|-------|----------|
| 1   | Peak1      | 5.04  | 195.423                   | 1.739        | 0.148 | 30.894   |
| 2   | Compound 8 | 16.26 | 11042.730                 | 98.261       | 0.212 | 1362.278 |

Sampling Rate 120.0017

Injection Volume 5 uL

Detector UV (237 nm)

Mobile Phase A ACN+0.01%TFA

Mobile Phase B water+0.01%TFA

Gradient 80-35B (30 min)

Temperature 25°C

Column Name Xbridge C18

Length 15 cm

Diameter 0.46 cm

Particle Size 5 um

Column Flow Rate 2 ml/min

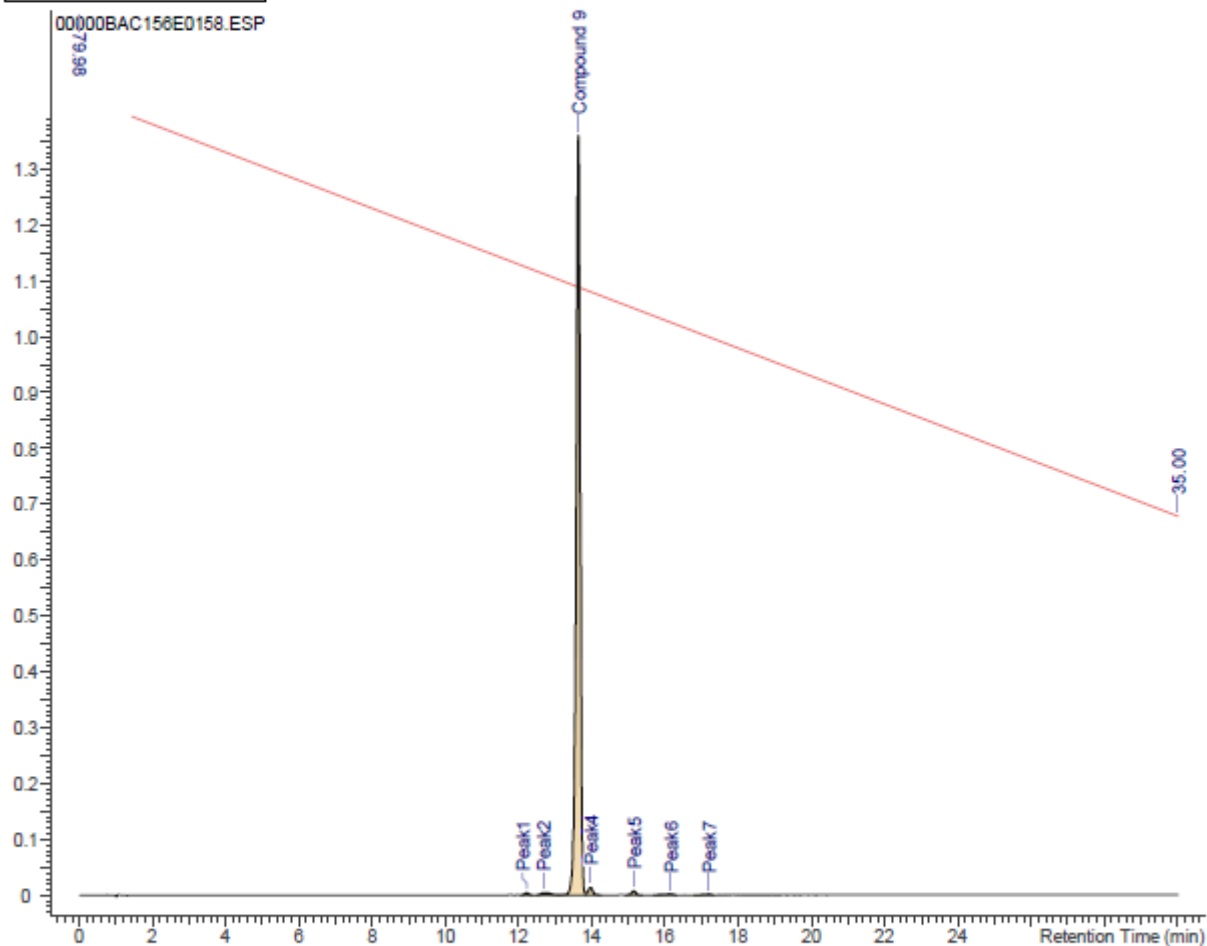

| No. | Name       | tR    | Peak Area<br>(Y units*ms) | Area Percent | Width | Height   |
|-----|------------|-------|---------------------------|--------------|-------|----------|
| 1   | Peak1      | 12.21 | 28.092                    | 0.264        | 0.189 | 3.927    |
| 2   | Peak2      | 12.67 | 67.416                    | 0.634        | 0.481 | 3.855    |
| 3   | Compound 9 | 13.63 | 10325.489                 | 97.145       | 0.194 | 1359.348 |
| 4   | Peak4      | 13.96 | 116.846                   | 1.099        | 0.225 | 13.456   |
| 5   | Peak5      | 15.15 | 56.264                    | 0.529        | 0.200 | 7.274    |
| 6   | Peak6      | 16.15 | 20.218                    | 0.190        | 0.242 | 1.925    |
| 7   | Peak7      | 17.19 | 14.639                    | 0.138        | 0.240 | 1.408    |

Sampling Rate 120.0017

Injection Volume 5 uL

Detector UV (237 nm)

Mobile Phase A ACN+0.01%TFA

Mobile Phase B water+0.01%TFA

Gradient 80-35B (30 min)

Temperature 25°C

Column Name Xbridge C18

Length 15 cm

Diameter 0.46 cm

Particle Size 5 um

Column Flow Rate 2 ml/min

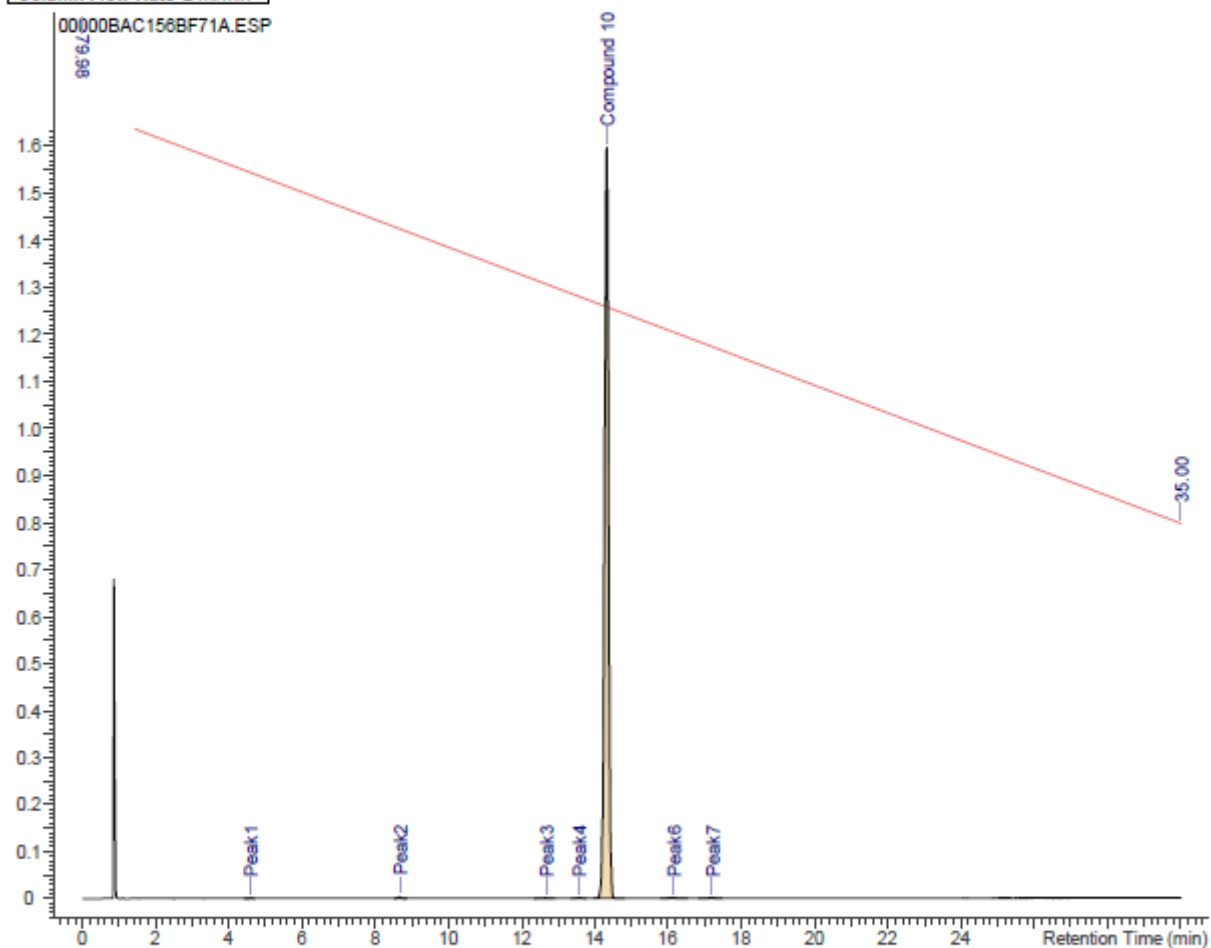

| No. | Name        | tR    | Peak Area<br>(Y units*ms) | Area Percent | Width | Height         |
|-----|-------------|-------|---------------------------|--------------|-------|----------------|
| 1   | Peak1       | 4.60  | 8.757                     | 0.074        | 0.250 | 1178717.250    |
| 2   | Peak2       | 8.66  | 19.446                    | 0.165        | 0.333 | 2709650.000    |
| 3   | Peak3       | 12.66 | 11.197                    | 0.095        | 0.230 | 1.087          |
| 4   | Peak4       | 13.55 | 12.198                    | 0.103        | 0.223 | 1.340          |
| 5   | Compound 10 | 14.32 | 11711.702                 | 99.211       | 0.775 | 1597104640.000 |
| 6   | Peak6       | 16.14 | 25.827                    | 0.219        | 0.388 | 1.711          |
| 7   | Peak7       | 17.20 | 15.750                    | 0.133        | 0.271 | 1.317          |

|                  |                                                           |
|------------------|-----------------------------------------------------------|
| Sampling Rate    | 120.002                                                   |
| Injection Volume | 5 uL                                                      |
| Detector         | UV (234 nm)                                               |
| Mobile Phase A   | Acetonitrile                                              |
| Mobile Phase B   | 10mM KH <sub>2</sub> PO <sub>4</sub> pH3HClO <sub>4</sub> |
| Gradient         | 99-54B (30 min)                                           |
| Temperature      | 25°C                                                      |
| Column Name      | Xbridge C18                                               |
| Length           | 15 cm                                                     |
| Diameter         | 0.46 cm                                                   |
| Particle Size    | 5 um                                                      |
| Column Flow Rate | 2 ml/min                                                  |

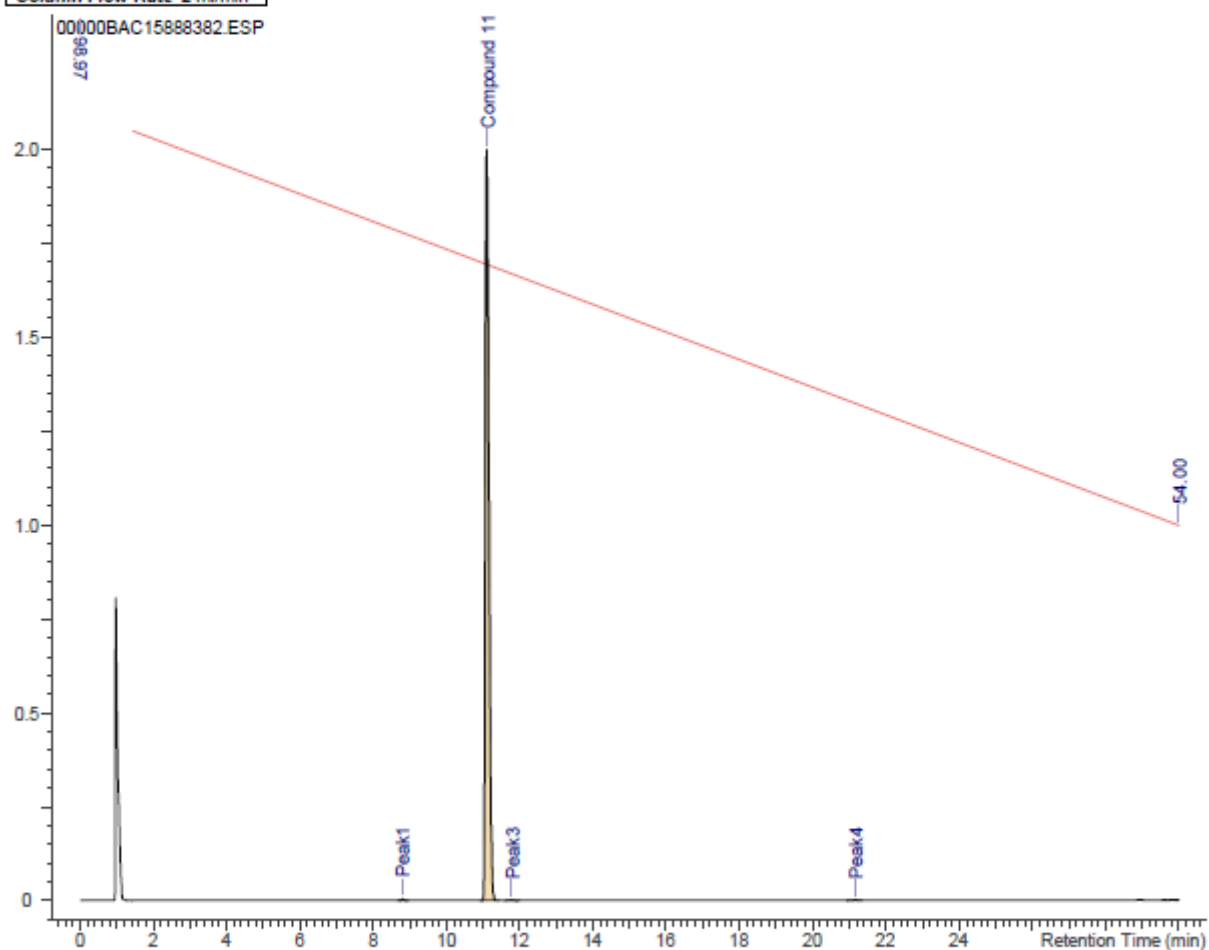

| No. | Name        | tR    | Peak Area<br>(Y units*ms) | Area Percent | Width | Height   |
|-----|-------------|-------|---------------------------|--------------|-------|----------|
| 1   | Peak1       | 8.79  | 17.589                    | 0.134        | 0.127 | 3.470    |
| 2   | Compound 11 | 11.10 | 13109.971                 | 99.656       | 0.176 | 1998.378 |
| 3   | Peak3       | 11.78 | 12.426                    | 0.094        | 0.191 | 1.615    |
| 4   | Peak4       | 21.17 | 15.199                    | 0.116        | 0.170 | 2.110    |

|                         |                 |
|-------------------------|-----------------|
| <b>Injection Volume</b> | 5 uL            |
| <b>Detector</b>         | UV (234 nm)     |
| <b>Mobile Phase A</b>   | ACN+0.01%TFA    |
| <b>Mobile Phase B</b>   | water+0.01%TFA  |
| <b>Gradient</b>         | 95-50B (30 min) |
| <b>Temperature</b>      | 22°C            |
| <b>Column Name</b>      | Xbridge C18     |
| <b>Length</b>           | 15 cm           |
| <b>Diameter</b>         | 0.46 cm         |
| <b>Particle Size</b>    | 5 um            |
| <b>Column Flow Rate</b> | 2ml/min         |

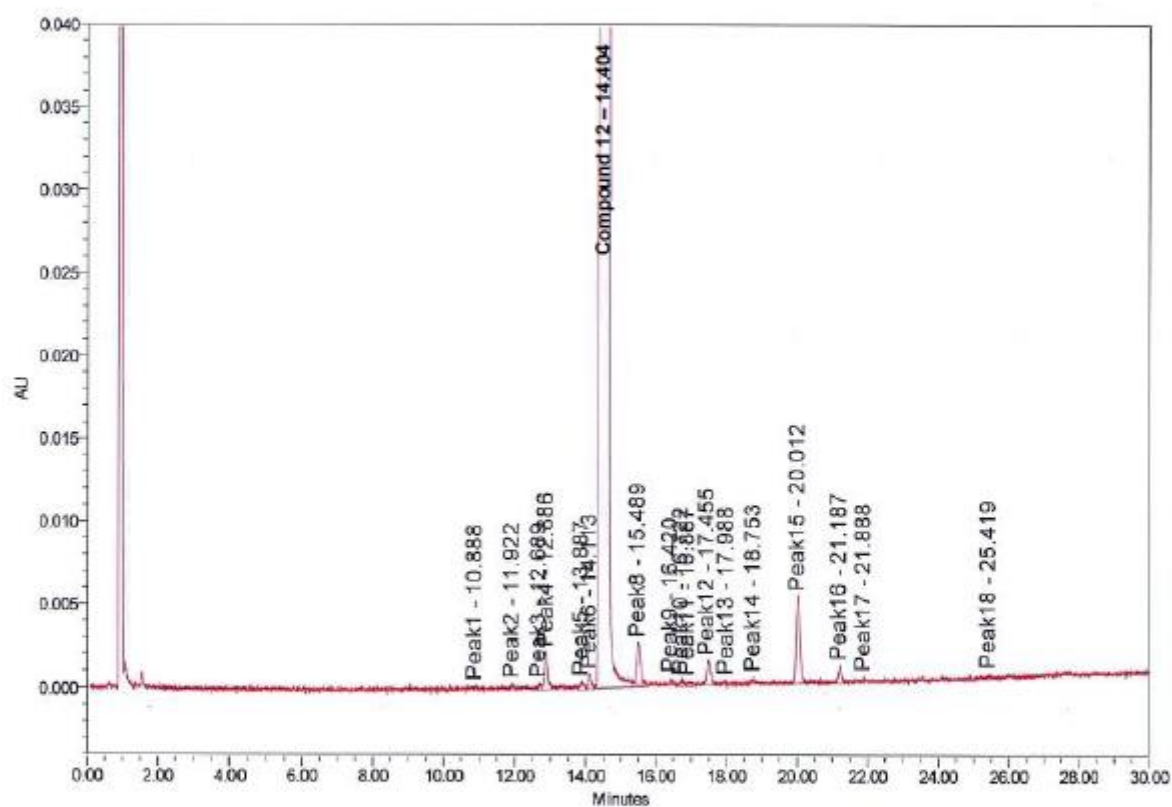

| Peak Results |           |        |               |                 |
|--------------|-----------|--------|---------------|-----------------|
|              | Peak Name | RT     | Area (μV*sec) | % Area RT Ratio |
| 1            | Peak1     | 10.668 | 604           | 0.004 0.758     |
| 2            | Peak2     | 11.922 | 1585          | 0.011 0.838     |
| 3            | Peak3     | 12.089 | 2100          | 0.015 0.861     |
| 4            | Peak4     | 12.666 | 12797         | 0.094 0.895     |
| 5            | Peak5     | 13.867 | 3035          | 0.023 0.964     |
| 6            | Peak6     | 14.113 | 5245          | 0.039 0.900     |
| 7            | Compd12   | 14.404 | 13425632      | 99.214 1.000    |
| 8            | Peak8     | 15.489 | 15295         | 0.113 1.075     |
| 9            | Peak9     | 16.420 | 1961          | 0.012 1.140     |
| 10           | Peak10    | 16.722 | 3047          | 0.023 1.161     |
| 11           | Peak11    | 16.867 | 3007          | 0.015 1.172     |
| 12           | Peak12    | 17.455 | 11799         | 0.087 1.212     |
| 13           | Peak13    | 17.988 | 1494          | 0.011 1.248     |
| 14           | Peak14    | 18.753 | 1330          | 0.009 1.302     |

|    | Peak Name | RT     | Area (μV*sec) | % Area RT Ratio |
|----|-----------|--------|---------------|-----------------|
| 15 | Peak15    | 20.012 | 32549         | 0.263 1.369     |
| 16 | Peak16    | 21.187 | 5381          | 0.047 1.471     |
| 17 | Peak17    | 21.888 | 1075          | 0.008 1.520     |
| 18 | Peak18    | 25.419 | 1475          | 0.011 1.765     |

Injection Volume 5 uL

Detector UV (236 nm)

Mobile Phase A ACN+0.01%TFA

Mobile Phase B water+0.01%TFA

Gradient 99-54B (30 min)

Temperature 25°C

Column Name Xbridge C18

Length 15 cm

Diameter 0.46 cm

Particle Size 5 um

Column Flow Rate 2 ml/min

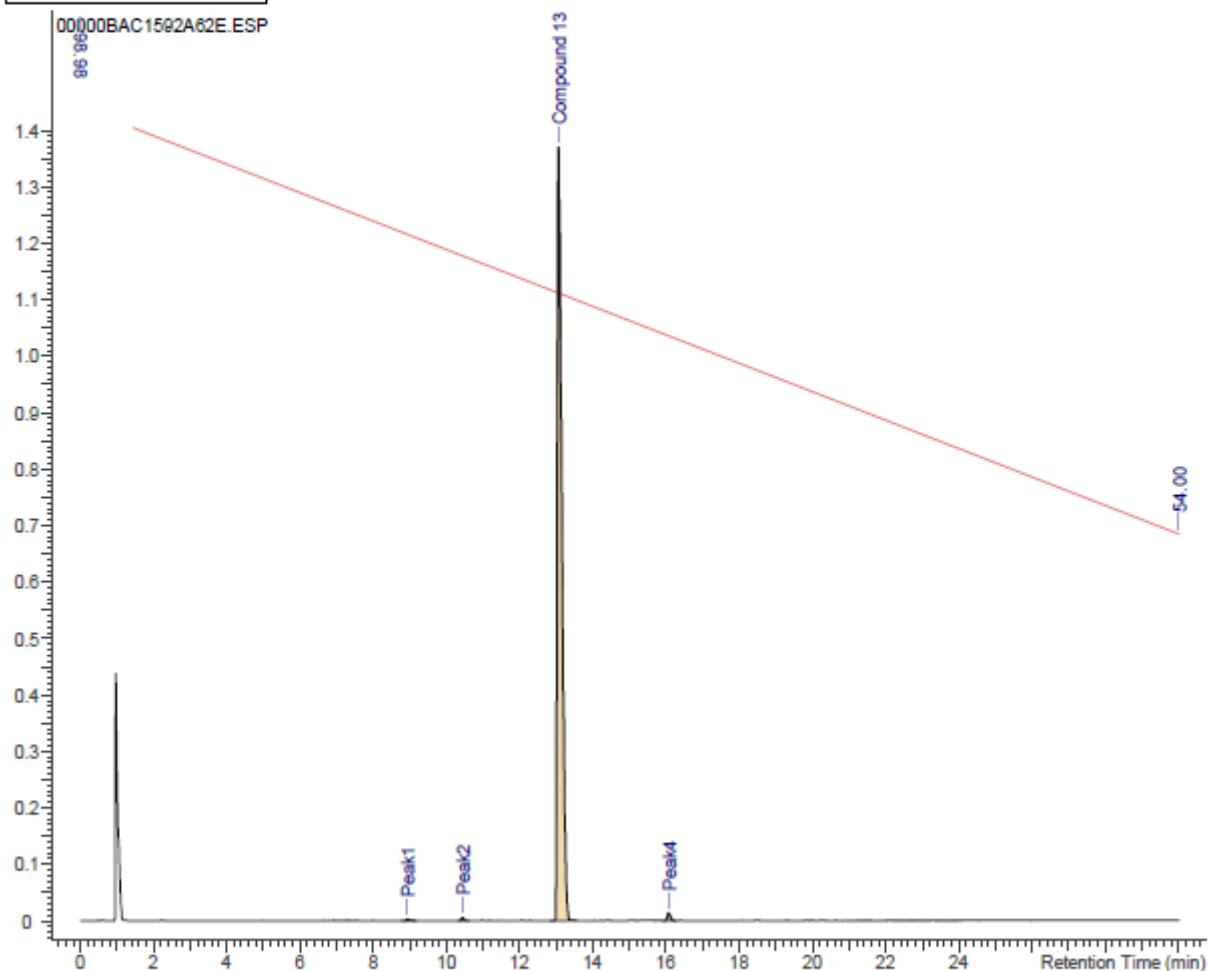

| No. | Name        | tR    | Peak Area<br>(Y units*ms) | Area Percent | Width | Height   |
|-----|-------------|-------|---------------------------|--------------|-------|----------|
| 1   | Peak1       | 8.93  | 15.585                    | 0.134        | 0.128 | 2.473    |
| 2   | Peak2       | 10.44 | 25.834                    | 0.222        | 0.123 | 5.306    |
| 3   | Compound 13 | 13.06 | 11493.586                 | 98.960       | 0.227 | 1370.273 |
| 4   | Peak4       | 16.06 | 79.407                    | 0.684        | 0.149 | 13.430   |

|                  |                 |
|------------------|-----------------|
| Injection Volume | 5 uL            |
| Detector         | UV (236 nm)     |
| Mobile Phase A   | ACN+0.01%TFA    |
| Mobile Phase B   | water+0.01%TFA  |
| Gradient         | 98-68B (30 min) |
| Temperature      | 22°C            |
| Column Name      | Xbridge C18     |
| Length           | 15 cm           |
| Diameter         | 0.46 cm         |
| Particle Size    | 5 um            |
| Column Flow Rate | 2ml/min         |

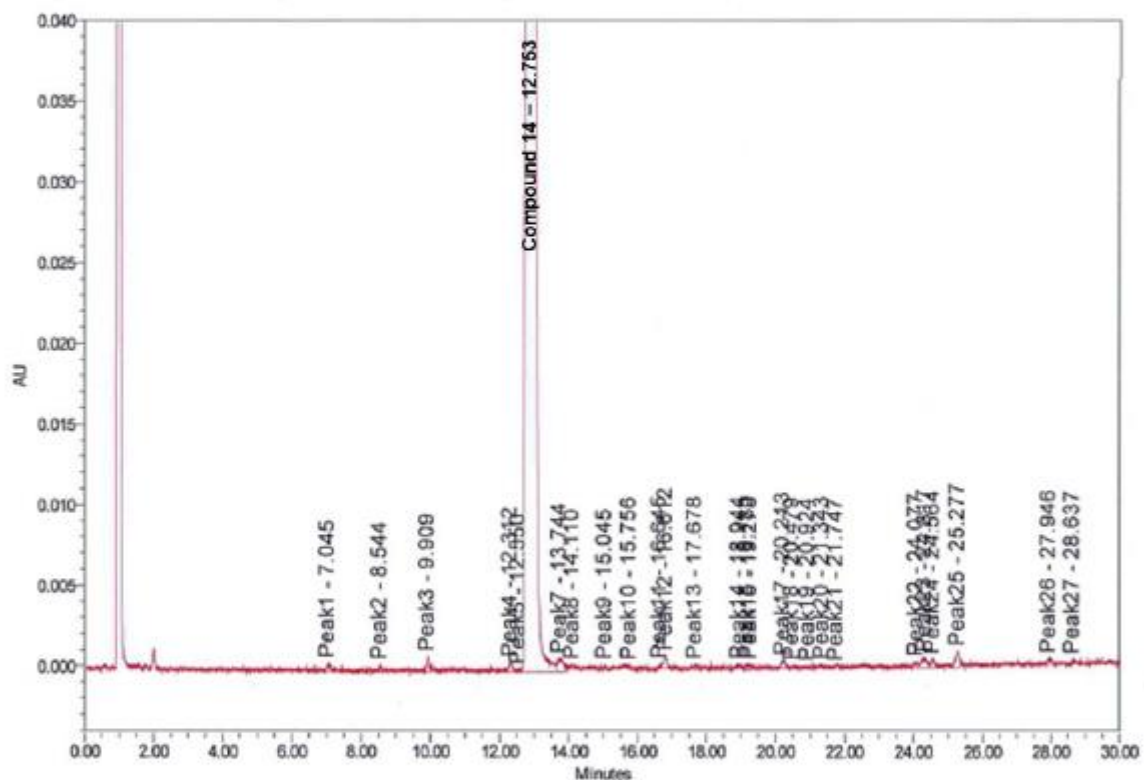

| Peak Results |           |        |               |        |          |
|--------------|-----------|--------|---------------|--------|----------|
|              | Peak Name | RT     | Area (μV*sec) | % Area | RT Ratio |
| 1            | Peak1     | 7.045  | 3085          | 0.000  | 0.552    |
| 2            | Peak2     | 8.544  | 1654          | 0.016  | 0.570    |
| 3            | Peak3     | 9.909  | 5159          | 0.050  | 0.777    |
| 4            | Peak4     | 12.312 | 3490          | 0.034  | 0.965    |
| 5            | Peak5     | 12.550 | 713           | 0.007  | 0.984    |
| 6            | Compd14   | 12.753 | 10329222      | 99.313 | 1.000    |
| 7            | Peak7     | 13.744 | 9059          | 0.093  | 1.078    |
| 8            | Peak8     | 14.110 | 1269          | 0.012  | 1.106    |
| 9            | Peak9     | 15.045 | 1143          | 0.011  | 1.180    |
| 10           | Peak10    | 15.756 | 1945          | 0.019  | 1.235    |
| 11           | Peak11    | 16.645 | 1161          | 0.011  | 1.305    |
| 12           | Peak12    | 16.812 | 5310          | 0.051  | 1.318    |
| 13           | Peak13    | 17.678 | 1323          | 0.013  | 1.386    |
| 14           | Peak14    | 18.944 | 1206          | 0.012  | 1.455    |

|    | Peak Name | RT     | Area (μV*sec) | % Area | RT Ratio |
|----|-----------|--------|---------------|--------|----------|
| 15 | Peak15    | 19.180 | 2460          | 0.024  | 1.504    |
| 16 | Peak16    | 19.278 | 1396          | 0.013  | 1.512    |
| 17 | Peak17    | 20.213 | 3542          | 0.036  | 1.585    |
| 18 | Peak18    | 20.478 | 587           | 0.006  | 1.606    |
| 19 | Peak19    | 20.924 | 568           | 0.005  | 1.641    |
| 20 | Peak20    | 21.343 | 711           | 0.007  | 1.674    |
| 21 | Peak21    | 21.747 | 1267          | 0.012  | 1.705    |
| 22 | Peak22    | 24.077 | 2712          | 0.026  | 1.886    |
| 23 | Peak23    | 24.317 | 6080          | 0.060  | 1.907    |
| 24 | Peak24    | 24.564 | 3418          | 0.033  | 1.926    |
| 25 | Peak25    | 25.277 | 8134          | 0.078  | 1.982    |
| 26 | Peak26    | 27.946 | 2297          | 0.022  | 2.191    |
| 27 | Peak27    | 28.637 | 1902          | 0.018  | 2.245    |

Sampling Rate 120.0017

Injection Volume 5 uL

Detector UV (236 nm)

Mobile Phase A ACN+0.01%TFA

Mobile Phase B water+0.01%TFA

Gradient 99-54B (30 min)

Temperature 25°C

Column Name Xbridge C18

Length 15 cm

Diameter 0.46 cm

Particle Size 5 um

Column Flow Rate 2 ml/min

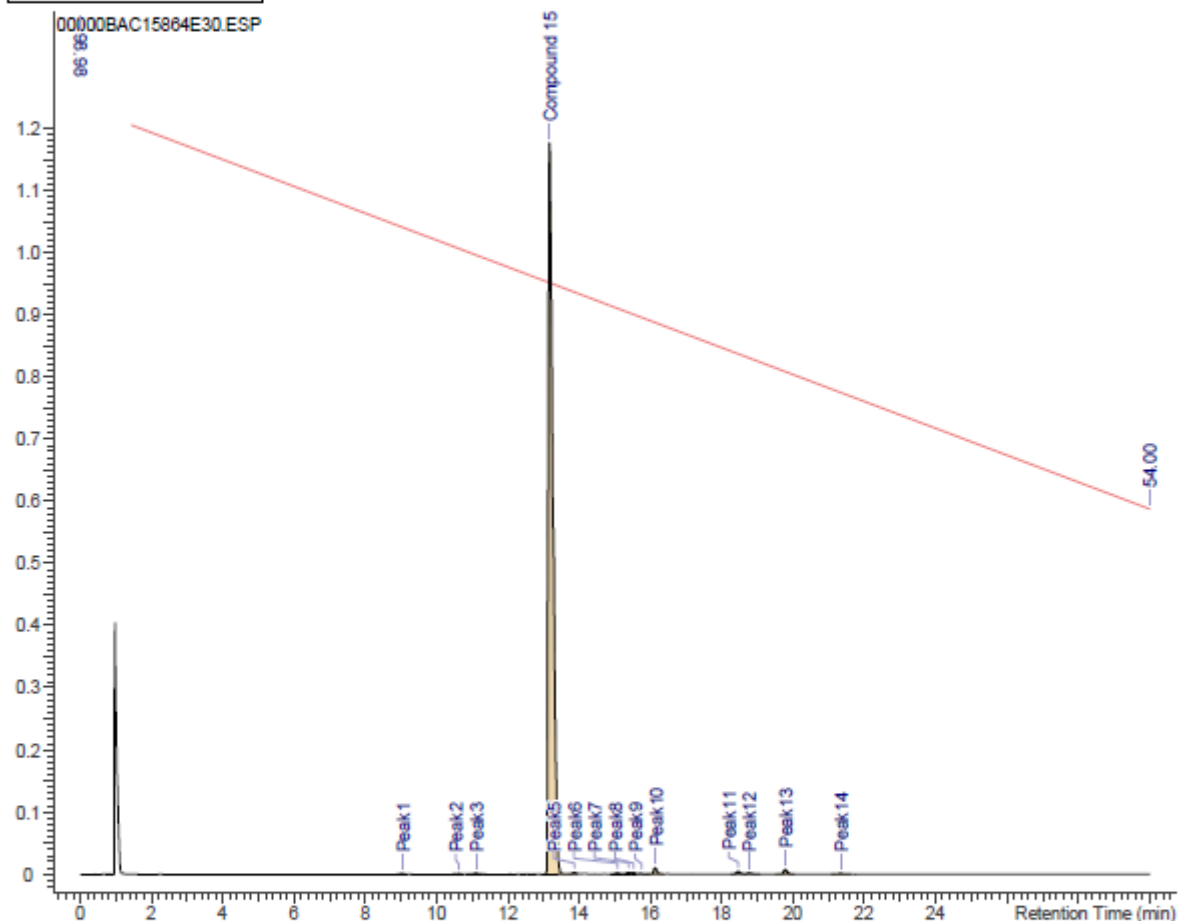

| No. | Name        | tR    | Peak Area<br>(Y units*ms) | Area Percent | Width | Height   |
|-----|-------------|-------|---------------------------|--------------|-------|----------|
| 1   | Peak1       | 9.04  | 6.130                     | 0.058        | 0.137 | 1.076    |
| 2   | Peak2       | 10.62 | 5.031                     | 0.047        | 0.129 | 0.849    |
| 3   | Peak3       | 11.10 | 9.333                     | 0.088        | 0.163 | 1.242    |
| 4   | Compound 15 | 13.17 | 10408.501                 | 97.729       | 0.240 | 1175.252 |
| 5   | Peak5       | 13.87 | 12.038                    | 0.113        | 0.164 | 1.922    |
| 6   | Peak6       | 15.08 | 13.482                    | 0.127        | 0.169 | 1.838    |
| 7   | Peak7       | 15.39 | 19.433                    | 0.182        | 0.181 | 2.853    |
| 8   | Peak8       | 15.52 | 14.687                    | 0.138        | 0.086 | 2.337    |
| 9   | Peak9       | 15.75 | 5.563                     | 0.052        | 0.161 | 0.858    |
| 10  | Peak10      | 16.14 | 60.756                    | 0.570        | 0.157 | 9.685    |
| 11  | Peak11      | 18.45 | 26.057                    | 0.245        | 0.177 | 3.763    |
| 12  | Peak12      | 18.76 | 13.215                    | 0.124        | 0.183 | 1.630    |
| 13  | Peak13      | 19.79 | 48.019                    | 0.451        | 0.170 | 6.944    |



Injection Volume 5 uL

Detector UV (205 nm)

Mobile Phase A ACN+0.01%TFA

Mobile Phase B water+0.01%TFA

Gradient 99-99B (30 min)

Temperature 25°C

Column Name Xbridge

Length 15 cm

Diameter 0.46 cm

Particle Size 5 um

Column Flow Rate 2 ml/min

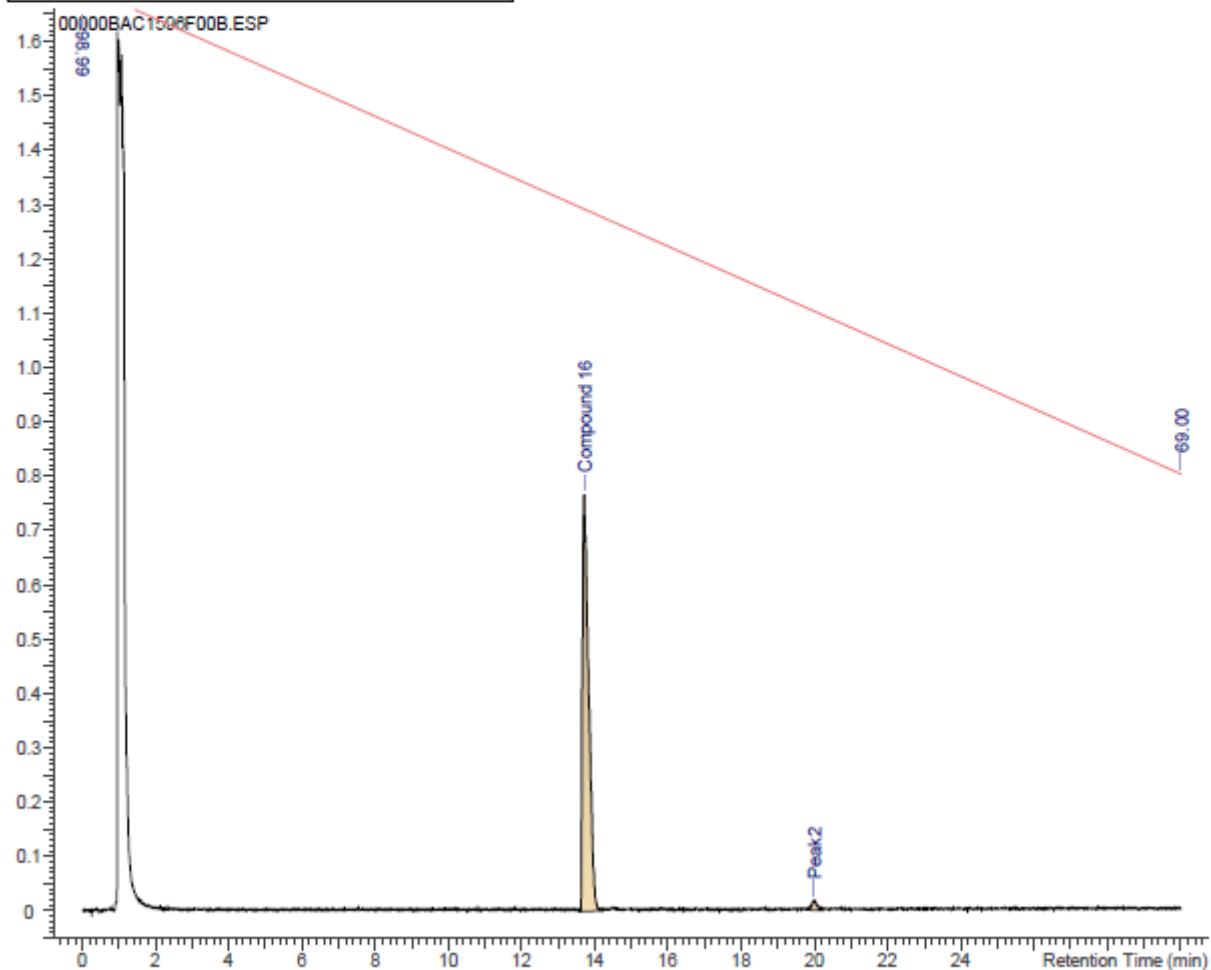

| No. | Name        | tR    | Peak Area<br>(Y units*ms) | Area Percent | Width | Height  |
|-----|-------------|-------|---------------------------|--------------|-------|---------|
| 1   | Compound 16 | 13.70 | 8611.731                  | 97.789       | 0.306 | 766.720 |
| 2   | Peak2       | 19.99 | 194.703                   | 2.211        | 0.219 | 18.578  |

## REFERENCES

1. Kabsch, W., Xds. *Acta Crystallogr. D Biol. Crystallogr.* **2010**, 66 (Pt 2), 125-132.
2. McCoy, A. J.; Grosse-Kunstleve, R. W.; Adams, P. D.; Winn, M. D.; Storoni, L. C.; Read, R. J., Phaser crystallographic software. *J. Appl. Crystallogr.* **2007**, 40 (Pt 4), 658-674.
3. <https://www.mn-am.com/products/corina>.
4. Emsley, P.; Cowtan, K., Coot: model-building tools for molecular graphics. *Acta Crystallogr. D Biol. Crystallogr.* **2004**, 60 (Pt 12 Pt 1), 2126-2132.
5. Murshudov, G. N.; Vagin, A. A.; Dodson, E. J., Refinement of macromolecular structures by the maximum-likelihood method. *Acta Crystallogr. D Biol. Crystallogr.* **1997**, 53 (Pt 3), 240-255.
6. Schrödinger Release 2019-2: Glide, Schrödinger, LLC, New York, NY, 2019.
7. Schrödinger Release 2019-2: LigPrep, Schrödinger, LLC, New York, NY, 2019.
8. Schrödinger Release 2019-2: ConfGen, Schrödinger, LLC, New York, NY, 2019.
9. Schrödinger Release 2019-2: Desmond Molecular Dynamics System, D. E. Shaw Research, New York, NY, 2019. Maestro-Desmond Interoperability Tools, Schrödinger, New York, NY, 2019.
10. Mathes, C., QPatch: the past, present and future of automated patch clamp. *Expert Opin. Ther. Targets* **2006**, 10 (2), 319-327.
11. Li, C.; Liu, B.; Chang, J.; Groessl, T.; Zimmerman, M.; He, Y. Q.; Isbell, J.; Tuntland, T., A modern in vivo pharmacokinetic paradigm: combining snapshot, rapid and full PK approaches to optimize and expedite early drug discovery. *Drug Discov. Today* **2013**, 18 (1-2), 71-78.
12. Furlotti, G.; Alisi, M. A.; Cazzolla, N.; Dragone, P.; Durando, L.; Magaro, G.; Mancini, F.; Mangano, G.; Ombrato, R.; Vitiello, M.; Armirotti, A.; Capurro, V.; Lanfranco, M.; Ottonello, G.; Summa, M.; Reggiani, A., Hit Optimization of 5-Substituted-N-(piperidin-4-ylmethyl)-1H-indazole-3-carboxamides: Potent Glycogen Synthase Kinase-3 (GSK-3) Inhibitors with in Vivo Activity in Model of Mood Disorders. *J. Med. Chem.* **2015**, 58 (22), 8920-8937.
